# Supplementary material for: Association of Smoking, Alcohol Consumption, Blood Pressure, Body Mass Index, and Glycemic Risk Factors With Age-Related Macular Degeneration: A Mendelian Randomization Study
Source: PubMed Central journal article supplement (PMC8569599; doi:10.1001/jamaophthalmol.2021.4601), 2021-11-04
Supplement: jamaophthalmol-e214601-s001.pdf [file jamaophthalmol-e214601-s001.pdf]

## Supplemental Online Content

Kuan V, Warwick A, Hingorani A, et al; International AMD Genomics Consortium (IAMDGC). Association of smoking, alcohol consumption, blood pressure, body mass index, and glycemic risk factors with age-related macular degeneration: a mendelian randomization study. *JAMA Ophthalmol*. Published online November 4, 2021. doi:10.1001/jamaophthalmol.2021.4601

**eMethods.** Study design, data sources, SNV selection, and statistical analysis

**eTable 1.** Smoking initiation exposure SNVs and their association with advanced AMD

**eTable 2.** Smoking cessation exposure SNVs and their association with advanced AMD

**eTable 3.** Lifetime smoking exposure SNVs and their association with advanced AMD

**eTable 4.** Age at smoking initiation exposure SNVs and their association with advanced AMD

**eTable 5.** Alcohol intake per week exposure SNVs and their association with advanced AMD

**eTable 6.** Body mass index exposure SNVs and their association with advanced AMD

**eTable 7.** Systolic blood pressure exposure SNVs and their association with advanced AMD

**eTable 8.** Diastolic blood pressure exposure SNVs and their association with advanced AMD

**eTable 9.** Type 2 diabetes exposure SNVs and their association with advanced AMD

**eTable 10.** HbA1c exposure SNVs and their association with advanced AMD

**eTable 11.** Fasting glucose exposure SNVs and their association with advanced AMD

**eTable 12.** Fasting insulin exposure SNVs and their association with advanced AMD

**eTable 13.** Mendelian randomization analysis of modifiable risk factors for advanced AMD, geographic atrophy, and neovascular AMD

**eFigure 1.** Scatter plot of SNV-smoking initiation and SNV-AMD association estimates for the smoking initiation instrument

**eFigure 2.** Scatter plot of SNV-smoking cessation and SNV-AMD association estimates for the smoking cessation instrument

**eFigure 3.** Scatter plot of SNV-lifetime smoking and SNV-AMD association estimates for the lifetime smoking instrument

**eFigure 4.** Scatter plot of SNV-age at smoking initiation and SNV-AMD association estimates for the age at smoking initiation instrument

**eFigure 5.** Scatter plot of SNV-alcoholic drinks per week and SNV-AMD association estimates for the alcohol intake per week instrument

**eFigure 6.** Scatter plot of SNV-BMI and SNV-AMD association estimates for the body mass index instrument

**eFigure 7.** Scatter plot of SNV-systolic blood pressure and SNV-AMD association estimates for the systolic blood pressure instrument

**eFigure 8.** Scatter plot of SNV-diastolic blood pressure and SNV-AMD association estimates for the diastolic blood pressure instrument

**eFigure 9.** Scatter plot of SNV–type 2 diabetes and SNV-AMD association estimates for the type 2 diabetes instrument

**eFigure 10.** Scatter plot of SNV-HbA1c and SNV-AMD association estimates for the HbA1c instrument

**eFigure 11.** Scatter plot of SNV-fasting glucose and SNV-AMD association estimates for the fasting glucose instrument

**eFigure 12.** Scatter plot of SNV-fasting insulin and SNV-AMD association estimates for the fasting insulin instrument

**eReferences**

This supplemental material has been provided by the authors to give readers additional information about their work.

eMethods

### **Study Design**

Two-sample Mendelian randomization (MR) allows the use of publicly available summary-level data from multiple sources, including large consortia, and is particularly useful given that genetic association studies for risk factors and disease outcomes are often conducted in different study samples. Single nucleotide variants (SNVs) strongly associated with a risk factor were selected as genetic instruments for that risk factor. The association estimates and standard errors for these SNVs were then extracted from the advanced AMD dataset, and that of its subtypes, geographic atrophy and neovascular AMD. The SNV-outcome (advanced AMD, GA and nAMD) association estimates were regressed on the SNV-exposure (smoking traits, alcohol intake, BMI, blood pressure and glycemic traits) association estimates to provide causal estimates of the exposures on the outcomes.

### **Data sources**

Summary-level statistics for lifestyle and metabolic risk factors were obtained from the following sources: smoking initiation (ever having smoked regularly), smoking cessation (a binary phenotype of former versus current smokers), age of smoking initiation and alcoholic drinks per week from the GWAS and Sequencing Consortium of Alcohol and Nicotine use (GSCAN)<sup>1</sup>; lifetime smoking (represented by an index which captures smoking status, duration, heaviness and cessation)<sup>2</sup> from UK Biobank (UKB)<sup>3</sup>; body mass index (BMI) from a meta-analysis<sup>4</sup> of the Genetic Investigation of ANthropometric Traits (GIANT) consortium<sup>5</sup> and UKB<sup>3</sup>; systolic blood pressure (SBP) and diastolic blood pressure (DBP) from a meta-analysis<sup>6</sup> of the Genetic Epidemiology Research on Adult Health and Aging (GERA) cohort<sup>7,8</sup>, the International Consortium for Blood Pressure (ICBP)<sup>9</sup> and UKB<sup>3</sup>; type 2 diabetes mellitus from a meta-analysis<sup>10</sup> of the DIAbetes Genetics Replication and Meta-analysis (DIAGRAM)<sup>11</sup>, GERA<sup>7,8</sup>, and UKB<sup>3</sup> datasets; glycated hemoglobin (HbA1c)<sup>12</sup>, fasting glucose<sup>13</sup> and fasting insulin<sup>10</sup> from the Meta-Analyses of Glucose and Insulin-related traits Consortium (MAGIC) (<https://www.magicinvestigators.org>).

Summary-level genetic association data for advanced AMD and its subtypes geographic atrophy and neovascular AMD were obtained from the International Age-related Macular Degeneration Genomics Consortium (IAMDGC)<sup>14</sup>.

## SNV Selection

SNVs were selected as instrumental variables for the modifiable risk factors in the study if they demonstrated genome-wide significant association ( $P < 5 \times 10^{-8}$ ) with the respective risk factors. At loci with multiple genome-wide significant SNVs and linkage disequilibrium  $R^2 > 0.1$  within 10,000 kb, the SNV with the lowest p-value for each exposure trait was selected. Palindromic SNVs for which allele frequencies were unknown in the source datasets, or with minor allele frequencies between 0.4 and 0.5 were excluded. Effect alleles for exposure SNVs were harmonized with the variant alleles for the effect estimates from the IAMDGC dataset (eFigures 1-12).

## Statistical Analysis

Under inverse-variance weighted (IVW) MR analysis, the association estimates of the SNVs for the outcomes were regressed on the association estimates of the instrumental variables for each of the risk factors, weighted by the inverse variances of the association estimates of the SNVs with the outcomes, with the intercept of the regression line forced through zero. The Cochran Q statistic was assessed as a measure of heterogeneity between variant-specific causal estimates, and  $P < 0.05$  was considered to indicate the presence of heterogeneity<sup>15,16</sup>. The IVW method with multiplicative random-effects was performed as it takes into account heterogeneity in the variant-specific causal estimates, and provides valid causal estimates when horizontal pleiotropy is “balanced” (i.e. when pleiotropic effects on the outcome are equally likely to be positive as negative)<sup>15,17,18</sup>.

Sensitivity analyses to assess the robustness of the IVW results to the assumption of balanced pleiotropy were conducted using the weighted median<sup>19</sup>, MR-Egger<sup>20</sup> and Mendelian randomization pleiotropy residual sum and outlier (MR-PRESSO)<sup>21</sup> methods. The weighted median method gives consistent estimates if over 50% of the weight in the analysis arises from valid instruments. The weighted median estimate is the median of an empirical distribution in which each instrumental variable estimate is ordered and weighted by the inverse of its variance. MR-Egger and MR-PRESSO can test and correct for directional pleiotropy. In MR-Egger, the intercept of the regression line is allowed to deviate from zero and provides an estimate of directional pleiotropy. MR-PRESSO consists of 1) the global test, which detects the presence of directional pleiotropy; 2) the outlier test, which produces a corrected causal estimate by removing pleiotropic outlying variants; and 3) the distortion test, which evaluates whether there is a significant difference in the causal estimate before and after adjusting for outliers. The outlier adjusted causal estimates from MR-PRESSO were reported if the global test

was significant and pleiotropic outliers were identified. Additionally, we performed multivariable MR<sup>22</sup> by adjusting for genetic predisposition to smoking traits in the analysis of alcohol intake, and for genetically-predicted alcohol intake in the analysis of smoking traits.

MR estimates are presented as odds ratios (OR) of advanced AMD and its subtypes for the effect of the risk factors as follows: one standard deviation increase in the log-odds of ever having smoked regularly; one standard deviation increase in the log-odds of smoking cessation (former versus current smoking); one standard deviation increase in the lifetime smoking index; one standard deviation increase of the age at which an individual started smoking cigarettes regularly; one standard deviation increase of log-transformed alcoholic drinks per week; one standard deviation (4.8kg/m<sup>2</sup>) increase in BMI; ten millimeters of mercury (10 mmHg) increase in systolic and diastolic pressure; one SD increase in the log-odds of having type 2 diabetes; one percentage point increase in glycated hemoglobin (HbA1c); one mmol/l increase in fasting glucose; and one log-transformed (pmol/l) increase in fasting insulin.

**eTable 1. Smoking initiation exposure SNVs and their association with advanced AMD.** Chr = chromosome; BP = base position (build 37); EA = effect allele; NEA = non-effect allele; EAF = effect allele frequency; SE = standard error.

| SNV         | Chr | BP        | EA | NEA | EAF   | Ever smoked regularly |       | Advanced AMD |       |
|-------------|-----|-----------|----|-----|-------|-----------------------|-------|--------------|-------|
|             |     |           |    |     |       | Beta                  | SE    | Beta         | SE    |
| rs12130857  | 1   | 7791461   | A  | G   | 0.325 | -0.018                | 0.003 | 0.007        | 0.018 |
| rs301807    | 1   | 8484823   | G  | A   | 0.57  | 0.018                 | 0.003 | -0.017       | 0.017 |
| rs3820277   | 1   | 18436657  | T  | G   | 0.526 | -0.019                | 0.003 | 0.007        | 0.017 |
| rs1889571   | 1   | 32195819  | G  | T   | 0.131 | 0.022                 | 0.004 | 0.025        | 0.025 |
| rs10914684  | 1   | 33795572  | A  | G   | 0.324 | -0.016                | 0.003 | -0.018       | 0.018 |
| rs2637869   | 1   | 38757237  | A  | G   | 0.297 | 0.018                 | 0.003 | 0.008        | 0.018 |
| rs12755632  | 1   | 41776623  | G  | A   | 0.316 | -0.015                | 0.003 | 0.001        | 0.018 |
| rs951740    | 1   | 44011737  | A  | G   | 0.625 | 0.03                  | 0.003 | 0.001        | 0.017 |
| rs925524    | 1   | 46496709  | G  | A   | 0.71  | 0.016                 | 0.003 | -0.006       | 0.018 |
| rs12022778  | 1   | 50603995  | C  | A   | 0.202 | 0.027                 | 0.003 | 0.016        | 0.021 |
| rs11587399  | 1   | 50861071  | T  | A   | 0.221 | -0.018                | 0.003 | -0.02        | 0.02  |
| rs4912332   | 1   | 58815243  | T  | C   | 0.491 | 0.014                 | 0.003 | 0.014        | 0.016 |
| rs1022528   | 1   | 71490122  | A  | G   | 0.344 | 0.017                 | 0.003 | 0.003        | 0.017 |
| rs12740789  | 1   | 72752073  | A  | G   | 0.178 | -0.028                | 0.003 | 0.034        | 0.022 |
| rs10789369  | 1   | 73824909  | G  | A   | 0.615 | -0.023                | 0.003 | -0.026       | 0.017 |
| rs1514176   | 1   | 74991596  | A  | G   | 0.58  | -0.019                | 0.003 | -0.021       | 0.017 |
| rs10873871  | 1   | 76689019  | G  | A   | 0.207 | 0.017                 | 0.003 | -0.022       | 0.023 |
| rs11162019  | 1   | 87913176  | T  | C   | 0.363 | -0.015                | 0.003 | 0.001        | 0.017 |
| rs1008078   | 1   | 91189731  | T  | C   | 0.402 | 0.023                 | 0.003 | 0.009        | 0.017 |
| rs1935571   | 1   | 96414335  | G  | T   | 0.48  | -0.016                | 0.003 | -0.007       | 0.017 |
| rs12027999  | 1   | 154206358 | C  | T   | 0.12  | -0.024                | 0.004 | -0.008       | 0.027 |
| rs45444697  | 1   | 155034632 | G  | C   | 0.212 | 0.02                  | 0.003 | 0.014        | 0.02  |
| rs2901785   | 1   | 174104743 | A  | G   | 0.446 | -0.017                | 0.003 | 0.008        | 0.017 |
| rs147052174 | 1   | 179783167 | T  | G   | 0.017 | 0.062                 | 0.01  | -0.018       | 0.065 |
| rs35656245  | 1   | 190957480 | A  | G   | 0.276 | 0.016                 | 0.003 | -0.023       | 0.018 |
| rs12739243  | 1   | 210302043 | C  | T   | 0.221 | -0.021                | 0.003 | -0.028       | 0.02  |
| rs12563365  | 1   | 236872829 | A  | G   | 0.556 | 0.017                 | 0.003 | -0.001       | 0.017 |
| rs876793    | 1   | 237852083 | C  | T   | 0.349 | -0.018                | 0.003 | -0.001       | 0.018 |
| rs114976176 | 2   | 264621    | C  | A   | 0.352 | -0.016                | 0.003 | 0.024        | 0.017 |
| rs62106258  | 2   | 417167    | C  | T   | 0.047 | -0.045                | 0.006 | -0.037       | 0.053 |
| rs6731872   | 2   | 624205    | G  | T   | 0.826 | 0.032                 | 0.003 | 0.011        | 0.021 |
| rs1022376   | 2   | 22067213  | C  | T   | 0.516 | -0.015                | 0.003 | 0.031        | 0.017 |
| rs61533748  | 2   | 22582968  | C  | T   | 0.384 | 0.017                 | 0.003 | 0.004        | 0.017 |
| rs72790288  | 2   | 29513404  | A  | G   | 0.028 | -0.046                | 0.008 | 0.027        | 0.053 |
| rs2710634   | 2   | 32808804  | C  | T   | 0.521 | -0.018                | 0.003 | 0.007        | 0.017 |
| rs62137126  | 2   | 44250149  | G  | A   | 0.121 | -0.024                | 0.004 | 0.026        | 0.025 |
| rs1004787   | 2   | 45159091  | A  | G   | 0.552 | 0.028                 | 0.003 | -0.005       | 0.017 |
| rs10490159  | 2   | 51341259  | T  | C   | 0.394 | 0.017                 | 0.003 | -0.021       | 0.017 |
| rs1518393   | 2   | 58171220  | C  | A   | 0.619 | 0.017                 | 0.003 | -0.025       | 0.017 |
| rs17616642  | 2   | 59022210  | G  | A   | 0.247 | -0.017                | 0.003 | 0.023        | 0.019 |
| rs6730325   | 2   | 59315828  | A  | G   | 0.61  | -0.015                | 0.003 | -0.037       | 0.017 |
| rs2539706   | 2   | 59819545  | A  | G   | 0.53  | 0.016                 | 0.003 | -0.003       | 0.017 |
| rs1863161   | 2   | 60139524  | A  | G   | 0.561 | 0.015                 | 0.003 | -0.036       | 0.017 |
| rs359247    | 2   | 60477052  | T  | A   | 0.639 | 0.022                 | 0.003 | -0.006       | 0.017 |
| rs62180324  | 2   | 63416606  | A  | G   | 0.212 | -0.02                 | 0.003 | 0.011        | 0.02  |
| rs6750107   | 2   | 80748807  | A  | G   | 0.387 | 0.015                 | 0.003 | -0.001       | 0.017 |
| rs12714017  | 2   | 80999398  | C  | T   | 0.511 | 0.015                 | 0.003 | -0.001       | 0.017 |
| rs56208390  | 2   | 83247997  | G  | A   | 0.123 | 0.022                 | 0.004 | 0.036        | 0.026 |
| rs11692435  | 2   | 98275354  | A  | G   | 0.085 | 0.025                 | 0.005 | 0.023        | 0.029 |
| rs13392222  | 2   | 100672408 | C  | A   | 0.139 | -0.023                | 0.004 | 0.001        | 0.024 |

|            |   |           |   |   |       |        |       |        |       |
|------------|---|-----------|---|---|-------|--------|-------|--------|-------|
| rs1901477  | 2 | 104126983 | G | A | 0.511 | 0.03   | 0.003 | -0.004 | 0.016 |
| rs11889814 | 2 | 104432494 | C | A | 0.128 | -0.021 | 0.004 | -0.013 | 0.025 |
| rs3811038  | 2 | 113240183 | C | T | 0.279 | 0.019  | 0.003 | -0.011 | 0.02  |
| rs75210106 | 2 | 113246436 | T | C | 0.177 | -0.019 | 0.003 | -0.042 | 0.022 |
| rs34399632 | 2 | 137571174 | G | A | 0.232 | 0.019  | 0.003 | 0.004  | 0.02  |
| rs74697736 | 2 | 145412271 | A | G | 0.287 | 0.022  | 0.003 | 0.016  | 0.019 |
| rs6756212  | 2 | 146140132 | T | C | 0.535 | -0.034 | 0.003 | -0.031 | 0.017 |
| rs16826827 | 2 | 147825689 | C | T | 0.124 | -0.022 | 0.004 | -0.013 | 0.026 |
| rs1445649  | 2 | 155682556 | C | T | 0.538 | 0.021  | 0.003 | -0.019 | 0.016 |
| rs1722666  | 2 | 161816880 | T | C | 0.732 | 0.016  | 0.003 | 0.002  | 0.019 |
| rs11678980 | 2 | 162101261 | A | G | 0.45  | 0.018  | 0.003 | 0.004  | 0.018 |
| rs12474587 | 2 | 162802993 | T | G | 0.429 | 0.024  | 0.003 | 0.004  | 0.017 |
| rs357304   | 2 | 164862639 | C | T | 0.727 | 0.017  | 0.003 | 0.026  | 0.019 |
| rs13007361 | 2 | 166250244 | A | G | 0.208 | 0.018  | 0.003 | -0.002 | 0.02  |
| rs7600835  | 2 | 172521827 | A | G | 0.342 | -0.015 | 0.003 | 0.002  | 0.019 |
| rs6750529  | 2 | 182027603 | T | C | 0.744 | 0.02   | 0.003 | 0.001  | 0.019 |
| rs17229285 | 2 | 199523122 | T | C | 0.505 | -0.015 | 0.003 | 0.015  | 0.017 |
| rs3115418  | 2 | 200936399 | C | T | 0.454 | -0.014 | 0.003 | -0.018 | 0.016 |
| rs62193862 | 2 | 202843875 | A | G | 0.1   | 0.024  | 0.004 | 0      | 0.035 |
| rs4674916  | 2 | 225365635 | A | C | 0.328 | -0.018 | 0.003 | -0.032 | 0.017 |
| rs4674993  | 2 | 226332033 | G | A | 0.2   | -0.024 | 0.003 | 0.003  | 0.021 |
| rs11713899 | 3 | 2365026   | C | A | 0.171 | 0.019  | 0.003 | 0.044  | 0.022 |
| rs748832   | 3 | 16851202  | G | A | 0.371 | 0.017  | 0.003 | 0      | 0.017 |
| rs10446419 | 3 | 25725501  | G | A | 0.207 | -0.02  | 0.003 | -0.01  | 0.021 |
| rs13319205 | 3 | 47800216  | A | T | 0.29  | 0.017  | 0.003 | -0.013 | 0.018 |
| rs3172494  | 3 | 48731487  | T | G | 0.115 | -0.029 | 0.004 | -0.006 | 0.029 |
| rs2526390  | 3 | 50192760  | T | C | 0.334 | 0.02   | 0.003 | 0.001  | 0.018 |
| rs2276825  | 3 | 52886605  | C | T | 0.245 | 0.019  | 0.003 | -0.003 | 0.019 |
| rs2306866  | 3 | 53766212  | T | A | 0.614 | -0.017 | 0.003 | -0.012 | 0.018 |
| rs73831818 | 3 | 55988394  | G | A | 0.057 | 0.032  | 0.005 | 0.005  | 0.036 |
| rs1910236  | 3 | 59434420  | A | G | 0.469 | 0.015  | 0.003 | 0.013  | 0.019 |
| rs7640107  | 3 | 59966156  | T | C | 0.431 | -0.014 | 0.003 | -0.033 | 0.017 |
| rs2734390  | 3 | 60459291  | G | A | 0.372 | 0.015  | 0.003 | 0.016  | 0.017 |
| rs221988   | 3 | 64234307  | C | A | 0.384 | -0.015 | 0.003 | 0.01   | 0.019 |
| rs62246017 | 3 | 71483084  | A | G | 0.323 | -0.016 | 0.003 | -0.033 | 0.018 |
| rs4543050  | 3 | 74954560  | T | A | 0.816 | 0.022  | 0.003 | 0.001  | 0.022 |
| rs6782116  | 3 | 77176032  | T | C | 0.415 | -0.015 | 0.003 | -0.035 | 0.017 |
| rs13066050 | 3 | 81325861  | T | C | 0.208 | 0.019  | 0.003 | 0.012  | 0.02  |
| rs12633090 | 3 | 83241365  | C | G | 0.182 | -0.023 | 0.003 | -0.019 | 0.021 |
| rs1549979  | 3 | 85460131  | T | C | 0.615 | -0.025 | 0.003 | 0.007  | 0.017 |
| rs57153235 | 3 | 85902536  | G | T | 0.318 | -0.019 | 0.003 | -0.013 | 0.018 |
| rs6437769  | 3 | 107997514 | T | C | 0.581 | 0.014  | 0.003 | 0.019  | 0.017 |
| rs9288999  | 3 | 114147927 | A | G | 0.735 | 0.017  | 0.003 | -0.007 | 0.019 |
| rs6438436  | 3 | 117822149 | T | C | 0.816 | 0.025  | 0.003 | 0.014  | 0.022 |
| rs12053870 | 3 | 118302515 | G | T | 0.542 | 0.016  | 0.003 | -0.003 | 0.017 |
| rs9826984  | 3 | 131945722 | A | G | 0.542 | -0.014 | 0.003 | -0.023 | 0.017 |
| rs2279829  | 3 | 147106319 | T | C | 0.216 | -0.017 | 0.003 | -0.012 | 0.02  |
| rs2319545  | 3 | 147719648 | A | C | 0.149 | 0.023  | 0.004 | 0.014  | 0.024 |
| rs10935779 | 3 | 149543102 | T | C | 0.415 | -0.014 | 0.003 | 0.015  | 0.017 |
| rs963354   | 3 | 157393770 | A | C | 0.687 | 0.015  | 0.003 | 0.001  | 0.018 |
| rs1714521  | 3 | 158284861 | C | A | 0.411 | -0.016 | 0.003 | 0.005  | 0.017 |
| rs1449012  | 3 | 159048333 | T | C | 0.463 | -0.015 | 0.003 | 0.022  | 0.017 |
| rs9850597  | 3 | 161761866 | A | G | 0.816 | -0.019 | 0.003 | -0.018 | 0.021 |
| rs1187820  | 3 | 173072584 | T | C | 0.439 | -0.014 | 0.003 | 0.024  | 0.018 |
| rs16828799 | 3 | 173353739 | T | G | 0.156 | 0.02   | 0.004 | -0.042 | 0.024 |
| rs9841807  | 3 | 175718927 | T | C | 0.273 | 0.016  | 0.003 | 0.015  | 0.018 |
| rs7631379  | 3 | 181409057 | C | T | 0.206 | 0.021  | 0.003 | -0.024 | 0.023 |
| rs12642744 | 4 | 28027176  | T | G | 0.744 | -0.017 | 0.003 | -0.003 | 0.019 |

|             |   |           |   |   |       |        |       |        |       |
|-------------|---|-----------|---|---|-------|--------|-------|--------|-------|
| rs59537158  | 4 | 28246049  | T | C | 0.214 | 0.022  | 0.003 | 0.009  | 0.022 |
| rs1389171   | 4 | 28822284  | A | T | 0.241 | -0.017 | 0.003 | 0.024  | 0.019 |
| rs55944129  | 4 | 29082156  | C | T | 0.267 | -0.018 | 0.003 | -0.023 | 0.019 |
| rs58400863  | 4 | 31184484  | A | G | 0.347 | -0.02  | 0.003 | -0.007 | 0.018 |
| rs7657022   | 4 | 35501032  | G | A | 0.489 | 0.018  | 0.003 | 0.022  | 0.017 |
| rs112725451 | 4 | 68017710  | T | C | 0.169 | 0.026  | 0.003 | -0.017 | 0.022 |
| rs1435479   | 4 | 94550450  | T | G | 0.287 | 0.016  | 0.003 | -0.026 | 0.018 |
| rs3934797   | 4 | 112467612 | A | G | 0.182 | -0.021 | 0.003 | 0.025  | 0.024 |
| rs71602617  | 4 | 136406155 | T | C | 0.216 | -0.018 | 0.003 | -0.009 | 0.02  |
| rs7696257   | 4 | 137474783 | A | G | 0.366 | 0.015  | 0.003 | -0.009 | 0.017 |
| rs13109980  | 4 | 140886963 | A | G | 0.326 | -0.022 | 0.003 | 0.018  | 0.018 |
| rs1116690   | 4 | 143510148 | G | A | 0.742 | 0.016  | 0.003 | -0.007 | 0.019 |
| rs13110073  | 4 | 147797913 | C | T | 0.395 | -0.025 | 0.003 | -0.018 | 0.017 |
| rs62340589  | 4 | 176875795 | C | G | 0.201 | 0.017  | 0.003 | 0.003  | 0.021 |
| rs12517438  | 5 | 30842054  | G | T | 0.538 | 0.015  | 0.003 | 0.023  | 0.016 |
| rs35375873  | 5 | 43190647  | C | G | 0.11  | -0.027 | 0.004 | -0.026 | 0.03  |
| rs71592686  | 5 | 60121271  | C | T | 0.274 | 0.021  | 0.003 | 0.028  | 0.019 |
| rs2028269   | 5 | 79308315  | A | G | 0.399 | 0.016  | 0.003 | 0.018  | 0.017 |
| rs6874731   | 5 | 80263865  | G | T | 0.484 | 0.015  | 0.003 | 0.007  | 0.017 |
| rs6452785   | 5 | 87685500  | T | C | 0.474 | -0.027 | 0.003 | -0.015 | 0.017 |
| rs10805858  | 5 | 88873832  | T | A | 0.335 | 0.018  | 0.003 | -0.003 | 0.018 |
| rs42417     | 5 | 94198290  | T | C | 0.691 | 0.017  | 0.003 | 0.012  | 0.021 |
| rs72780746  | 5 | 103929588 | C | T | 0.173 | -0.026 | 0.003 | 0.014  | 0.021 |
| rs10060196  | 5 | 106455988 | A | C | 0.581 | 0.018  | 0.003 | 0      | 0.017 |
| rs72789626  | 5 | 106825618 | A | T | 0.136 | -0.026 | 0.004 | 0.038  | 0.025 |
| rs17165769  | 5 | 107365642 | G | A | 0.395 | 0.016  | 0.003 | 0.002  | 0.017 |
| rs329124    | 5 | 133865452 | G | A | 0.428 | -0.016 | 0.003 | -0.003 | 0.017 |
| rs1385108   | 5 | 154839646 | T | C | 0.239 | 0.019  | 0.003 | 0.003  | 0.019 |
| rs1173461   | 5 | 157707571 | T | C | 0.327 | 0.017  | 0.003 | 0.039  | 0.018 |
| rs11956866  | 5 | 161018271 | G | T | 0.567 | -0.015 | 0.003 | -0.019 | 0.017 |
| rs3909281   | 5 | 165096435 | G | T | 0.536 | 0.021  | 0.003 | 0.034  | 0.017 |
| rs3843905   | 5 | 165427280 | T | C | 0.403 | -0.015 | 0.003 | 0.006  | 0.017 |
| rs79476395  | 5 | 166063680 | G | A | 0.073 | 0.033  | 0.005 | 0.115  | 0.034 |
| rs6890961   | 5 | 166778503 | T | C | 0.624 | -0.019 | 0.003 | 0.012  | 0.019 |
| rs4044321   | 5 | 166989513 | G | A | 0.644 | -0.023 | 0.003 | -0.004 | 0.017 |
| rs2173019   | 5 | 167614971 | A | T | 0.177 | 0.028  | 0.003 | 0.049  | 0.022 |
| rs10042827  | 5 | 170299916 | C | T | 0.681 | 0.017  | 0.003 | 0.022  | 0.018 |
| rs359431    | 5 | 173288534 | T | C | 0.56  | -0.014 | 0.003 | 0.003  | 0.017 |
| rs1059490   | 6 | 26171250  | C | T | 0.367 | -0.019 | 0.003 | 0.015  | 0.017 |
| rs1150668   | 6 | 28129789  | G | T | 0.419 | -0.019 | 0.003 | 0.019  | 0.017 |
| rs3218116   | 6 | 41901763  | T | C | 0.256 | -0.02  | 0.003 | 0.002  | 0.019 |
| rs160631    | 6 | 52895230  | G | T | 0.731 | -0.017 | 0.003 | -0.019 | 0.019 |
| rs7743165   | 6 | 67521222  | G | T | 0.495 | 0.019  | 0.003 | -0.018 | 0.017 |
| rs10945141  | 6 | 69470709  | A | G | 0.263 | 0.018  | 0.003 | 0.014  | 0.019 |
| rs619087    | 6 | 94175279  | G | A | 0.422 | 0.014  | 0.003 | -0.022 | 0.017 |
| rs6568832   | 6 | 97702876  | A | G | 0.754 | 0.019  | 0.003 | 0.009  | 0.019 |
| rs12195240  | 6 | 98636905  | A | G | 0.285 | 0.025  | 0.003 | -0.011 | 0.018 |
| rs6936160   | 6 | 100347745 | T | C | 0.698 | 0.02   | 0.003 | 0.022  | 0.018 |
| rs12530388  | 6 | 101329173 | C | A | 0.511 | -0.018 | 0.003 | -0.003 | 0.017 |
| rs3800227   | 6 | 108994161 | G | A | 0.742 | 0.017  | 0.003 | 0.015  | 0.019 |
| rs118202    | 6 | 111658371 | T | G | 0.812 | -0.037 | 0.003 | 0.01   | 0.021 |
| rs73008357  | 6 | 156431856 | C | A | 0.121 | -0.022 | 0.004 | -0.023 | 0.026 |
| rs9331343   | 6 | 157738258 | C | T | 0.568 | -0.014 | 0.003 | 0.006  | 0.026 |
| rs1737329   | 6 | 163807748 | G | C | 0.742 | 0.017  | 0.003 | -0.025 | 0.019 |
| rs10272990  | 7 | 1703675   | C | T | 0.328 | -0.021 | 0.003 | 0.01   | 0.018 |
| rs6948707   | 7 | 1870794   | G | T | 0.419 | 0.024  | 0.003 | -0.002 | 0.017 |
| rs7809303   | 7 | 69484366  | A | G | 0.325 | -0.021 | 0.003 | -0.005 | 0.018 |
| rs7802996   | 7 | 77771983  | T | C | 0.166 | -0.021 | 0.003 | -0.034 | 0.022 |



|            |    |           |   |   |       |        |       |        |       |
|------------|----|-----------|---|---|-------|--------|-------|--------|-------|
| rs1030015  | 7  | 78139581  | T | G | 0.52  | 0.014  | 0.003 | -0.004 | 0.016 |
| rs4727189  | 7  | 88442568  | C | T | 0.344 | 0.015  | 0.003 | -0.006 | 0.017 |
| rs76841737 | 7  | 91281409  | G | C | 0.103 | -0.023 | 0.004 | -0.045 | 0.031 |
| rs11768481 | 7  | 96629103  | A | C | 0.34  | -0.019 | 0.003 | 0.004  | 0.02  |
| rs1799068  | 7  | 97707069  | T | G | 0.379 | 0.017  | 0.003 | 0.013  | 0.017 |
| rs13437771 | 7  | 99071478  | G | A | 0.155 | -0.027 | 0.004 | 0.046  | 0.023 |
| rs11766326 | 7  | 111100585 | C | T | 0.506 | -0.018 | 0.003 | -0.006 | 0.017 |
| rs6968380  | 7  | 114940159 | A | G | 0.681 | -0.023 | 0.003 | -0.026 | 0.018 |
| rs10233018 | 7  | 117523709 | G | A | 0.516 | 0.025  | 0.003 | -0.054 | 0.017 |
| rs10953957 | 7  | 121954709 | A | G | 0.386 | 0.014  | 0.003 | 0.021  | 0.017 |
| rs77283305 | 7  | 132593831 | A | G | 0.306 | -0.015 | 0.003 | 0.024  | 0.018 |
| rs10279261 | 7  | 133589846 | A | G | 0.618 | -0.019 | 0.003 | -0.004 | 0.017 |
| rs1561112  | 7  | 133840652 | C | T | 0.413 | -0.015 | 0.003 | -0.003 | 0.017 |
| rs2952251  | 8  | 10143164  | G | A | 0.744 | 0.016  | 0.003 | -0.016 | 0.019 |
| rs11783093 | 8  | 27425349  | T | C | 0.158 | -0.047 | 0.003 | 0.007  | 0.023 |
| rs7836565  | 8  | 52569449  | T | C | 0.718 | -0.016 | 0.003 | -0.021 | 0.018 |
| rs13261666 | 8  | 59814666  | T | G | 0.517 | -0.02  | 0.003 | 0      | 0.016 |
| rs2063976  | 8  | 91096366  | T | C | 0.665 | -0.02  | 0.003 | 0.015  | 0.018 |
| rs6993429  | 8  | 92733282  | A | C | 0.453 | -0.019 | 0.003 | -0.017 | 0.017 |
| rs6986430  | 8  | 93048104  | C | T | 0.222 | -0.024 | 0.003 | -0.013 | 0.019 |
| rs9987376  | 8  | 93190014  | G | T | 0.574 | -0.02  | 0.003 | 0.015  | 0.017 |
| rs290601   | 8  | 115374642 | T | C | 0.274 | 0.016  | 0.003 | -0.005 | 0.018 |
| rs3847244  | 9  | 3025368   | T | C | 0.47  | 0.019  | 0.003 | 0.02   | 0.017 |
| rs11791671 | 9  | 3398679   | T | C | 0.067 | 0.028  | 0.005 | -0.07  | 0.038 |
| rs7024924  | 9  | 8282399   | C | T | 0.174 | 0.019  | 0.003 | 0.012  | 0.022 |
| rs7867822  | 9  | 20676454  | G | A | 0.673 | -0.015 | 0.003 | -0.009 | 0.017 |
| rs10966092 | 9  | 23831658  | C | T | 0.267 | -0.02  | 0.003 | -0.037 | 0.019 |
| rs4877285  | 9  | 81354129  | A | G | 0.668 | -0.018 | 0.003 | -0.01  | 0.019 |
| rs1930371  | 9  | 81444104  | T | C | 0.241 | -0.017 | 0.003 | 0.002  | 0.019 |
| rs2378662  | 9  | 86707289  | A | G | 0.541 | 0.015  | 0.003 | -0.005 | 0.017 |
| rs1927901  | 9  | 120519111 | C | T | 0.553 | -0.014 | 0.003 | 0.011  | 0.016 |
| rs4837631  | 9  | 122061948 | T | C | 0.446 | -0.015 | 0.003 | -0.017 | 0.017 |
| rs1759433  | 9  | 128073097 | A | G | 0.48  | 0.015  | 0.003 | -0.01  | 0.016 |
| rs34553878 | 9  | 134334588 | G | A | 0.111 | 0.025  | 0.004 | 0.048  | 0.029 |
| rs7026534  | 9  | 134907263 | G | T | 0.704 | -0.017 | 0.003 | -0.022 | 0.018 |
| rs10858334 | 9  | 137989785 | G | C | 0.14  | 0.023  | 0.004 | 0.044  | 0.027 |
| rs10905461 | 10 | 8803551   | C | T | 0.748 | -0.016 | 0.003 | -0.014 | 0.019 |
| rs1291821  | 10 | 11133823  | G | A | 0.534 | 0.014  | 0.003 | 0.005  | 0.017 |
| rs11258417 | 10 | 13533053  | T | C | 0.391 | -0.015 | 0.003 | -0.024 | 0.017 |
| rs7072776  | 10 | 22032942  | G | A | 0.712 | -0.022 | 0.003 | -0.028 | 0.019 |
| rs2796793  | 10 | 36634124  | A | G | 0.452 | 0.014  | 0.003 | -0.01  | 0.017 |
| rs1733760  | 10 | 56698174  | C | T | 0.51  | 0.015  | 0.003 | 0.004  | 0.017 |
| rs7901883  | 10 | 103186838 | A | G | 0.23  | -0.019 | 0.003 | -0.009 | 0.02  |
| rs11594623 | 10 | 103960351 | C | T | 0.234 | 0.027  | 0.003 | 0.014  | 0.02  |
| rs11191269 | 10 | 104120522 | G | C | 0.193 | 0.018  | 0.003 | -0.032 | 0.021 |
| rs28408682 | 10 | 104403310 | G | A | 0.6   | 0.017  | 0.003 | -0.019 | 0.018 |
| rs12244388 | 10 | 104640052 | A | G | 0.35  | 0.026  | 0.003 | 0.045  | 0.017 |
| rs34970111 | 10 | 106078937 | T | C | 0.458 | -0.015 | 0.003 | -0.001 | 0.017 |
| rs9787523  | 10 | 106460460 | C | T | 0.418 | -0.016 | 0.003 | -0.019 | 0.017 |
| rs11192347 | 10 | 106929313 | A | G | 0.104 | -0.026 | 0.004 | 0.013  | 0.028 |
| rs10885480 | 10 | 115378364 | C | T | 0.284 | -0.019 | 0.003 | 0.021  | 0.019 |
| rs4752018  | 10 | 118678712 | A | C | 0.231 | 0.019  | 0.003 | 0.035  | 0.02  |
| rs9423279  | 10 | 125680419 | G | C | 0.645 | -0.019 | 0.003 | -0.019 | 0.022 |
| rs6265     | 11 | 27679916  | T | C | 0.188 | -0.029 | 0.003 | -0.038 | 0.021 |
| rs4275621  | 11 | 28652996  | G | A | 0.382 | -0.021 | 0.003 | -0.021 | 0.017 |
| rs62618693 | 11 | 32956492  | T | C | 0.043 | -0.035 | 0.006 | -0.046 | 0.041 |
| rs2939756  | 11 | 41436297  | A | G | 0.48  | -0.016 | 0.003 | -0.021 | 0.017 |
| rs1381775  | 11 | 42442826  | C | T | 0.712 | -0.016 | 0.003 | -0.015 | 0.018 |

|            |    |           |   |   |       |        |       |        |       |
|------------|----|-----------|---|---|-------|--------|-------|--------|-------|
| rs2959084  | 11 | 46078656  | A | G | 0.705 | 0.017  | 0.003 | 0.03   | 0.019 |
| rs3740977  | 11 | 46393574  | C | T | 0.167 | 0.019  | 0.003 | -0.047 | 0.022 |
| rs61886926 | 11 | 64133552  | T | C | 0.384 | -0.018 | 0.003 | -0.003 | 0.017 |
| rs61884449 | 11 | 64485193  | T | C | 0.149 | 0.02   | 0.004 | -0.003 | 0.023 |
| rs644740   | 11 | 65561468  | T | C | 0.457 | -0.014 | 0.003 | 0.025  | 0.016 |
| rs7943721  | 11 | 73309393  | A | G | 0.829 | -0.021 | 0.003 | -0.038 | 0.031 |
| rs7929518  | 11 | 85980958  | G | A | 0.773 | 0.019  | 0.003 | -0.01  | 0.019 |
| rs586699   | 11 | 92289734  | A | G | 0.543 | -0.015 | 0.003 | 0.028  | 0.016 |
| rs76460663 | 11 | 111979741 | G | C | 0.041 | -0.042 | 0.006 | 0.052  | 0.056 |
| rs2155646  | 11 | 112912811 | C | T | 0.4   | 0.038  | 0.003 | 0.024  | 0.017 |
| rs1713676  | 11 | 113660576 | G | A | 0.523 | -0.017 | 0.003 | -0.009 | 0.016 |
| rs238896   | 11 | 113994505 | A | G | 0.49  | -0.017 | 0.003 | 0.009  | 0.018 |
| rs540860   | 11 | 121530888 | G | A | 0.543 | 0.018  | 0.003 | -0.003 | 0.017 |
| rs1944689  | 11 | 121634334 | T | G | 0.786 | 0.018  | 0.003 | -0.011 | 0.02  |
| rs1834306  | 11 | 122023187 | G | A | 0.579 | -0.014 | 0.003 | -0.003 | 0.019 |
| rs1106363  | 11 | 131966264 | T | C | 0.345 | 0.017  | 0.003 | 0.016  | 0.017 |
| rs2010921  | 11 | 132098205 | A | G | 0.311 | 0.017  | 0.003 | -0.001 | 0.019 |
| rs11057005 | 12 | 16748721  | G | A | 0.441 | -0.016 | 0.003 | -0.011 | 0.017 |
| rs13906    | 12 | 49952394  | T | C | 0.109 | -0.025 | 0.004 | 0.006  | 0.026 |
| rs4759229  | 12 | 56474480  | G | A | 0.656 | 0.016  | 0.003 | 0.008  | 0.017 |
| rs7969559  | 12 | 69655167  | G | A | 0.713 | -0.017 | 0.003 | -0.028 | 0.018 |
| rs7134009  | 12 | 75263193  | C | T | 0.287 | -0.016 | 0.003 | -0.029 | 0.018 |
| rs77215829 | 12 | 112618346 | C | A | 0.131 | -0.024 | 0.004 | -0.057 | 0.028 |
| rs1109480  | 12 | 121083279 | A | G | 0.384 | -0.017 | 0.003 | 0.028  | 0.018 |
| rs11611651 | 12 | 133380790 | A | G | 0.087 | 0.027  | 0.005 | -0.009 | 0.031 |
| rs17197663 | 13 | 38172867  | A | G | 0.125 | -0.022 | 0.004 | -0.005 | 0.025 |
| rs4264267  | 13 | 38359676  | T | C | 0.527 | 0.015  | 0.003 | 0.037  | 0.019 |
| rs61959481 | 13 | 55834929  | A | G | 0.21  | -0.02  | 0.003 | -0.019 | 0.02  |
| rs3098272  | 13 | 55931424  | C | A | 0.799 | -0.018 | 0.003 | -0.02  | 0.021 |
| rs9538162  | 13 | 59265043  | C | T | 0.416 | 0.017  | 0.003 | -0.001 | 0.017 |
| rs1413119  | 13 | 59339281  | T | C | 0.396 | -0.015 | 0.003 | -0.005 | 0.017 |
| rs56367474 | 13 | 59454139  | T | C | 0.304 | -0.017 | 0.003 | -0.002 | 0.019 |
| rs55786907 | 13 | 59871584  | G | A | 0.162 | 0.019  | 0.003 | -0.01  | 0.023 |
| rs4886207  | 13 | 60705792  | C | T | 0.637 | -0.016 | 0.003 | 0.028  | 0.017 |
| rs9540731  | 13 | 66949370  | T | C | 0.509 | -0.018 | 0.003 | 0.008  | 0.016 |
| rs9545155  | 13 | 80191873  | C | T | 0.478 | -0.016 | 0.003 | 0.005  | 0.016 |
| rs1772572  | 13 | 81191176  | A | C | 0.324 | -0.017 | 0.003 | 0.012  | 0.018 |
| rs75674569 | 13 | 96823724  | A | G | 0.1   | -0.025 | 0.004 | -0.05  | 0.028 |
| rs7333559  | 13 | 100546450 | A | G | 0.783 | -0.023 | 0.003 | 0.001  | 0.021 |
| rs1108130  | 13 | 100648356 | A | T | 0.212 | 0.024  | 0.003 | -0.014 | 0.021 |
| rs12855717 | 13 | 101252635 | T | C | 0.538 | 0.016  | 0.003 | -0.01  | 0.017 |
| rs12878369 | 14 | 28346502  | A | C | 0.415 | 0.017  | 0.003 | 0.019  | 0.017 |
| rs9323328  | 14 | 58653514  | G | A | 0.537 | -0.014 | 0.003 | -0.009 | 0.016 |
| rs1811739  | 14 | 77529375  | A | G | 0.248 | 0.018  | 0.003 | -0.005 | 0.019 |
| rs8005334  | 14 | 79563654  | G | T | 0.36  | 0.017  | 0.003 | -0.012 | 0.017 |
| rs34940743 | 14 | 80102233  | G | A | 0.346 | 0.016  | 0.003 | 0.016  | 0.022 |
| rs2925128  | 14 | 98362355  | T | C | 0.385 | 0.017  | 0.003 | -0.025 | 0.017 |
| rs1381287  | 14 | 98597552  | T | C | 0.467 | 0.018  | 0.003 | 0.032  | 0.017 |
| rs55913542 | 14 | 99693843  | T | G | 0.175 | 0.019  | 0.003 | 0.001  | 0.022 |
| rs1435672  | 15 | 36399479  | C | T | 0.56  | 0.014  | 0.003 | 0.026  | 0.017 |
| rs281296   | 15 | 47685010  | A | G | 0.357 | 0.025  | 0.003 | 0.002  | 0.018 |
| rs56902655 | 15 | 63898709  | G | T | 0.136 | -0.022 | 0.004 | -0.03  | 0.024 |
| rs2289791  | 15 | 67476952  | T | G | 0.247 | -0.018 | 0.003 | -0.045 | 0.021 |
| rs60833441 | 15 | 74048768  | G | A | 0.461 | -0.014 | 0.003 | -0.021 | 0.017 |
| rs62007780 | 15 | 78025464  | T | G | 0.416 | -0.016 | 0.003 | 0.011  | 0.017 |
| rs4310804  | 15 | 96858409  | G | C | 0.247 | -0.018 | 0.003 | 0.001  | 0.02  |
| rs8027457  | 15 | 99204101  | C | T | 0.511 | 0.015  | 0.003 | 0.001  | 0.017 |
| rs1139897  | 16 | 720986    | A | G | 0.23  | -0.024 | 0.003 | 0.031  | 0.019 |

|             |    |          |   |   |       |        |       |        |       |
|-------------|----|----------|---|---|-------|--------|-------|--------|-------|
| rs11076962  | 16 | 5811367  | C | T | 0.279 | 0.018  | 0.003 | -0.002 | 0.019 |
| rs7192140   | 16 | 10173748 | C | T | 0.498 | -0.017 | 0.003 | 0.049  | 0.017 |
| rs9922607   | 16 | 17570220 | T | C | 0.2   | -0.022 | 0.003 | -0.03  | 0.021 |
| rs9941217   | 16 | 18050926 | G | C | 0.352 | -0.019 | 0.003 | 0.016  | 0.018 |
| rs7188873   | 16 | 24727064 | G | A | 0.613 | 0.02   | 0.003 | -0.018 | 0.017 |
| rs6497840   | 16 | 25351633 | A | G | 0.707 | 0.023  | 0.003 | 0.003  | 0.019 |
| rs4785187   | 16 | 49766772 | A | G | 0.223 | 0.02   | 0.003 | -0.012 | 0.02  |
| rs8050598   | 16 | 49891964 | T | C | 0.254 | 0.019  | 0.003 | 0.029  | 0.023 |
| rs12918191  | 16 | 50945156 | G | A | 0.243 | -0.02  | 0.003 | -0.015 | 0.019 |
| rs9302604   | 16 | 69576894 | G | A | 0.435 | 0.019  | 0.003 | 0.006  | 0.017 |
| rs9936784   | 16 | 72230694 | G | T | 0.534 | 0.014  | 0.003 | 0.021  | 0.017 |
| rs62052916  | 16 | 72574550 | T | A | 0.07  | -0.032 | 0.005 | 0.006  | 0.034 |
| rs4788676   | 16 | 72950468 | C | T | 0.229 | -0.018 | 0.003 | -0.012 | 0.019 |
| rs117657830 | 16 | 75766873 | G | A | 0.042 | -0.038 | 0.006 | -0.05  | 0.041 |
| rs1050847   | 16 | 87443734 | T | C | 0.559 | -0.015 | 0.003 | -0.004 | 0.017 |
| rs11642231  | 16 | 89608702 | A | G | 0.369 | -0.016 | 0.003 | -0.011 | 0.017 |
| rs4790874   | 17 | 1995177  | T | C | 0.532 | 0.017  | 0.003 | 0.085  | 0.017 |
| rs11078713  | 17 | 7795972  | G | A | 0.419 | -0.015 | 0.003 | -0.003 | 0.018 |
| rs28441558  | 17 | 7803118  | C | T | 0.056 | -0.036 | 0.006 | -0.014 | 0.041 |
| rs11651955  | 17 | 16235462 | A | G | 0.499 | -0.014 | 0.003 | -0.014 | 0.017 |
| rs67777803  | 17 | 27323322 | T | G | 0.172 | -0.025 | 0.003 | -0.018 | 0.022 |
| rs2344976   | 17 | 30685935 | C | T | 0.612 | -0.015 | 0.003 | 0.014  | 0.017 |
| rs3764351   | 17 | 37824339 | A | G | 0.657 | -0.015 | 0.003 | 0.025  | 0.017 |
| rs17692129  | 17 | 44793283 | T | C | 0.331 | 0.02   | 0.003 | -0.012 | 0.029 |
| rs75919030  | 17 | 50193197 | C | T | 0.267 | -0.021 | 0.003 | -0.014 | 0.019 |
| rs2938134   | 17 | 50243397 | A | C | 0.673 | -0.018 | 0.003 | -0.005 | 0.017 |
| rs2587507   | 17 | 77790135 | C | T | 0.502 | -0.015 | 0.003 | -0.017 | 0.016 |
| rs34342129  | 18 | 5872472  | C | T | 0.509 | -0.014 | 0.003 | 0.014  | 0.017 |
| rs4476253   | 18 | 25253297 | A | G | 0.24  | -0.018 | 0.003 | -0.005 | 0.02  |
| rs7505855   | 18 | 31696075 | T | C | 0.586 | -0.017 | 0.003 | 0.003  | 0.017 |
| rs8096225   | 18 | 36921851 | C | A | 0.703 | 0.016  | 0.003 | -0.001 | 0.018 |
| rs67050670  | 18 | 39297254 | G | A | 0.229 | -0.02  | 0.003 | -0.004 | 0.019 |
| rs72898831  | 18 | 42658643 | G | A | 0.155 | -0.024 | 0.004 | 0.01   | 0.024 |
| rs8083764   | 18 | 49874515 | T | G | 0.306 | -0.016 | 0.003 | -0.014 | 0.018 |
| rs1373178   | 18 | 49967811 | G | T | 0.588 | -0.02  | 0.003 | -0.017 | 0.017 |
| rs62098013  | 18 | 50863861 | A | G | 0.365 | 0.018  | 0.003 | -0.006 | 0.018 |
| rs72938304  | 18 | 53661743 | A | G | 0.113 | -0.027 | 0.004 | -0.028 | 0.027 |
| rs11872397  | 18 | 72535282 | A | G | 0.253 | -0.017 | 0.003 | 0.047  | 0.02  |
| rs71367544  | 18 | 77574374 | T | C | 0.203 | 0.021  | 0.003 | 0.043  | 0.021 |
| rs76608582  | 19 | 4474725  | A | C | 0.049 | -0.035 | 0.006 | -0.009 | 0.061 |
| rs10853981  | 19 | 4965064  | A | G | 0.33  | 0.015  | 0.003 | 0.003  | 0.018 |
| rs113230003 | 19 | 18460956 | A | G | 0.255 | -0.019 | 0.003 | -0.015 | 0.019 |
| rs8103660   | 19 | 18566395 | C | T | 0.354 | 0.016  | 0.003 | 0.02   | 0.017 |
| rs117734003 | 19 | 51129745 | C | G | 0.067 | 0.03   | 0.005 | 0.077  | 0.042 |
| rs1126757   | 19 | 55879872 | T | C | 0.473 | 0.014  | 0.003 | 0.022  | 0.016 |
| rs6050446   | 20 | 25195509 | G | A | 0.971 | 0.054  | 0.008 | -0.025 | 0.05  |
| rs1555445   | 20 | 31175258 | T | A | 0.318 | 0.019  | 0.003 | -0.006 | 0.018 |
| rs6073075   | 20 | 42015801 | A | T | 0.824 | -0.019 | 0.003 | -0.025 | 0.023 |
| rs910912    | 20 | 54462393 | C | T | 0.739 | -0.017 | 0.003 | 0.011  | 0.019 |
| rs6011779   | 20 | 61984317 | T | C | 0.806 | -0.019 | 0.003 | -0.038 | 0.033 |
| rs3810496   | 20 | 62406886 | C | T | 0.619 | 0.016  | 0.003 | 0.02   | 0.018 |
| rs4818005   | 21 | 40588819 | A | G | 0.581 | -0.02  | 0.003 | -0.029 | 0.017 |
| rs139896    | 22 | 38397797 | C | T | 0.648 | 0.015  | 0.003 | 0.023  | 0.017 |
| rs4822102   | 22 | 42698430 | T | C | 0.618 | -0.017 | 0.003 | -0.015 | 0.017 |

**Table 2. Smoking cessation exposure SNVs and their association with advanced AMD.** Chr = chromosome; BP = base position (build 37); EA = effect allele; NEA = non-effect allele; EAF = effect allele frequency; SE = standard error.

| SNV         | Chr | BP        | EA | NEA | EAF   | Smoking cessation |       | Advanced AMD |       |
|-------------|-----|-----------|----|-----|-------|-------------------|-------|--------------|-------|
|             |     |           |    |     |       | Beta              | SE    | Beta         | SE    |
| rs112187834 | 2   | 23953454  | A  | T   | 0.14  | -0.033            | 0.006 | 0.019        | 0.023 |
| rs7617480   | 3   | 49210732  | C  | A   | 0.773 | 0.033             | 0.005 | -0.044       | 0.019 |
| rs12203592  | 6   | 396321    | T  | C   | 0.176 | 0.029             | 0.005 | 0.000        | 0.044 |
| rs707968    | 6   | 35058117  | G  | A   | 0.681 | -0.023            | 0.004 | -0.004       | 0.018 |
| rs7778443   | 7   | 32314690  | C  | T   | 0.618 | 0.023             | 0.004 | -0.03        | 0.017 |
| rs1565735   | 8   | 27426077  | A  | T   | 0.199 | 0.035             | 0.005 | 0.000        | 0.021 |
| rs60749569  | 8   | 42602668  | T  | A   | 0.08  | 0.04              | 0.007 | -0.007       | 0.034 |
| rs12378015  | 9   | 127917257 | A  | G   | 0.3   | 0.028             | 0.004 | 0.003        | 0.018 |
| rs9409844   | 9   | 136461851 | A  | G   | 0.045 | 0.059             | 0.009 | -0.107       | 0.039 |
| rs3025327   | 9   | 136467344 | C  | G   | 0.107 | -0.079            | 0.006 | -0.005       | 0.028 |
| rs10821523  | 9   | 136473572 | C  | A   | 0.536 | -0.026            | 0.004 | 0.003        | 0.017 |
| rs1611124   | 9   | 136509275 | T  | G   | 0.068 | 0.045             | 0.008 | -0.014       | 0.033 |
| rs7109376   | 11  | 16372431  | A  | T   | 0.279 | -0.028            | 0.004 | -0.005       | 0.018 |
| rs591143    | 15  | 47647755  | T  | C   | 0.592 | 0.024             | 0.004 | 0.008        | 0.017 |
| rs3866543   | 15  | 76629609  | G  | T   | 0.523 | -0.022            | 0.004 | -0.015       | 0.016 |
| rs518425    | 15  | 78883813  | G  | A   | 0.285 | 0.031             | 0.004 | -0.028       | 0.018 |
| rs145580088 | 19  | 41342842  | G  | A   | 0.024 | -0.091            | 0.013 | 0.167        | 0.084 |
| rs56113850  | 19  | 41353107  | C  | T   | 0.567 | 0.058             | 0.004 | -0.032       | 0.02  |
| rs117824460 | 19  | 41371480  | G  | A   | 0.027 | -0.086            | 0.012 | 0.164        | 0.068 |
| rs59586387  | 19  | 41375030  | G  | C   | 0.068 | -0.051            | 0.008 | 0.011        | 0.047 |
| rs6011779   | 20  | 61984317  | T  | C   | 0.806 | 0.05              | 0.005 | -0.038       | 0.033 |
| rs6089904   | 20  | 62018289  | T  | A   | 0.047 | 0.064             | 0.009 | 0.02         | 0.052 |
| rs9607805   | 22  | 41854446  | T  | C   | 0.725 | -0.03             | 0.004 | 0.005        | 0.019 |

**eTable 3. Lifetime smoking exposure SNVs and their association with advanced AMD.**<sup>a</sup> Chr = chromosome; BP = base position (build 37); EA = effect allele; NEA = non-effect allele; EAF = effect allele frequency; SE = standard error.

| SNV        | Chr | BP        | EA | NEA | EAF   | Lifetime smoking index |       | Advanced AMD |       |
|------------|-----|-----------|----|-----|-------|------------------------|-------|--------------|-------|
|            |     |           |    |     |       | Beta                   | SE    | Beta         | SE    |
| rs4949465  | 1   | 32178489  | T  | C   | 0.87  | -0.017                 | 0.003 | -0.021       | 0.024 |
| rs549845   | 1   | 44076469  | G  | A   | 0.301 | 0.016                  | 0.002 | 0.008        | 0.018 |
| rs1933270  | 1   | 49977965  | T  | G   | 0.364 | 0.013                  | 0.002 | 0.011        | 0.017 |
| rs7528604  | 1   | 66407352  | G  | A   | 0.566 | 0.014                  | 0.002 | 0.012        | 0.017 |
| rs11210229 | 1   | 73860028  | A  | G   | 0.384 | 0.017                  | 0.002 | 0.03         | 0.017 |
| rs7553348  | 1   | 75005067  | G  | A   | 0.438 | 0.014                  | 0.002 | 0.024        | 0.017 |
| rs1931263  | 1   | 96175101  | G  | T   | 0.51  | -0.011                 | 0.002 | 0.01         | 0.016 |
| rs7519626  | 1   | 99514554  | C  | T   | 0.324 | 0.012                  | 0.002 | -0.033       | 0.018 |
| rs9435340  | 1   | 107593201 | T  | A   | 0.344 | 0.012                  | 0.002 | 0.06         | 0.017 |
| rs10918701 | 1   | 162090536 | G  | A   | 0.372 | 0.012                  | 0.002 | 0.006        | 0.017 |
| rs2867112  | 2   | 651349    | T  | G   | 0.835 | 0.021                  | 0.003 | 0.013        | 0.021 |
| rs6741228  | 2   | 22548774  | T  | C   | 0.433 | 0.011                  | 0.002 | -0.004       | 0.017 |
| rs62135536 | 2   | 44326028  | C  | T   | 0.968 | 0.035                  | 0.006 | -0.036       | 0.05  |
| rs7569203  | 2   | 45154418  | A  | C   | 0.689 | -0.016                 | 0.002 | 0.016        | 0.018 |
| rs13016665 | 2   | 57995348  | C  | A   | 0.577 | -0.012                 | 0.002 | 0.023        | 0.017 |
| rs4671357  | 2   | 60136176  | T  | C   | 0.519 | -0.014                 | 0.002 | 0.022        | 0.017 |
| rs359243   | 2   | 60475509  | T  | C   | 0.393 | -0.013                 | 0.002 | 0.008        | 0.017 |
| rs62155874 | 2   | 105973094 | A  | G   | 0.873 | -0.024                 | 0.003 | -0.008       | 0.026 |
| rs3811038  | 2   | 113240183 | T  | C   | 0.724 | -0.014                 | 0.002 | 0.011        | 0.02  |
| rs2890772  | 2   | 146175106 | G  | T   | 0.413 | -0.02                  | 0.002 | -0.056       | 0.017 |
| rs62175972 | 2   | 161362830 | T  | C   | 0.966 | 0.031                  | 0.006 | 0.007        | 0.044 |
| rs13009008 | 2   | 174043233 | A  | G   | 0.328 | 0.012                  | 0.002 | -0.02        | 0.017 |
| rs4473348  | 2   | 182073742 | A  | T   | 0.25  | -0.015                 | 0.002 | 0.005        | 0.019 |
| rs12623702 | 2   | 202885506 | A  | G   | 0.613 | -0.014                 | 0.002 | 0.000        | 0.018 |
| rs6779302  | 3   | 16859710  | G  | T   | 0.633 | -0.013                 | 0.002 | -0.001       | 0.017 |
| rs6778080  | 3   | 49317338  | T  | C   | 0.267 | 0.016                  | 0.002 | 0.049        | 0.018 |
| rs421983   | 3   | 84892866  | T  | C   | 0.519 | 0.013                  | 0.002 | 0.027        | 0.016 |
| rs326341   | 3   | 107811142 | G  | A   | 0.525 | 0.014                  | 0.002 | -0.003       | 0.017 |
| rs73220544 | 3   | 131074511 | A  | C   | 0.842 | -0.016                 | 0.003 | 0.031        | 0.024 |
| rs9842947  | 3   | 157412246 | C  | T   | 0.326 | -0.013                 | 0.002 | -0.001       | 0.018 |
| rs624833   | 4   | 2881256   | T  | G   | 0.695 | 0.013                  | 0.002 | -0.005       | 0.018 |
| rs61796681 | 4   | 23678196  | A  | T   | 0.912 | -0.019                 | 0.004 | -0.017       | 0.031 |
| rs317021   | 4   | 35418368  | T  | A   | 0.814 | -0.017                 | 0.003 | -0.012       | 0.022 |
| rs72678864 | 4   | 112422145 | G  | A   | 0.829 | 0.018                  | 0.003 | -0.035       | 0.026 |
| rs17576594 | 4   | 147952241 | G  | A   | 0.724 | 0.016                  | 0.002 | 0.026        | 0.018 |
| rs11948770 | 5   | 13246336  | T  | C   | 0.768 | -0.015                 | 0.002 | 0.000        | 0.019 |
| rs71627581 | 5   | 43161351  | G  | A   | 0.889 | 0.019                  | 0.003 | 0.029        | 0.03  |
| rs10052591 | 5   | 50812738  | T  | C   | 0.573 | 0.012                  | 0.002 | -0.016       | 0.017 |
| rs2080870  | 5   | 60388313  | A  | T   | 0.258 | 0.012                  | 0.002 | 0.008        | 0.019 |
| rs4571506  | 5   | 87756918  | C  | T   | 0.54  | 0.011                  | 0.002 | 0.017        | 0.016 |
| rs4957528  | 5   | 106420589 | A  | C   | 0.208 | -0.015                 | 0.002 | 0.027        | 0.022 |
| rs329120   | 5   | 133861756 | C  | T   | 0.581 | 0.014                  | 0.002 | 0.005        | 0.017 |
| rs986391   | 5   | 166993972 | G  | A   | 0.367 | 0.016                  | 0.002 | 0.01         | 0.017 |
| rs13153393 | 5   | 167604213 | A  | G   | 0.884 | -0.02                  | 0.003 | -0.063       | 0.027 |
| rs245774   | 5   | 170530930 | A  | G   | 0.272 | -0.013                 | 0.002 | -0.029       | 0.019 |
| rs6935954  | 6   | 26255451  | A  | G   | 0.421 | 0.014                  | 0.002 | -0.019       | 0.017 |
| rs2254710  | 6   | 37477000  | C  | A   | 0.236 | 0.013                  | 0.002 | -0.012       | 0.02  |
| rs2894808  | 6   | 52861990  | T  | A   | 0.922 | -0.022                 | 0.004 | -0.032       | 0.03  |
| rs12202536 | 6   | 67475273  | A  | G   | 0.513 | -0.012                 | 0.002 | 0.016        | 0.016 |
| rs7766610  | 6   | 111707821 | C  | A   | 0.183 | 0.018                  | 0.003 | -0.014       | 0.021 |
| rs1922018  | 7   | 3560401   | C  | T   | 0.364 | 0.014                  | 0.002 | 0.005        | 0.017 |

|             |    |           |   |   |       |        |       |        |       |
|-------------|----|-----------|---|---|-------|--------|-------|--------|-------|
| rs10226228  | 7  | 32315613  | A | G | 0.63  | -0.016 | 0.002 | -0.032 | 0.017 |
| rs11768481  | 7  | 96629103  | C | A | 0.666 | 0.013  | 0.002 | -0.004 | 0.02  |
| rs6962772   | 7  | 99081730  | A | G | 0.846 | 0.016  | 0.003 | -0.047 | 0.023 |
| rs10282292  | 7  | 111092478 | C | T | 0.362 | 0.013  | 0.002 | 0.017  | 0.017 |
| rs7807019   | 7  | 117543063 | A | G | 0.54  | -0.015 | 0.002 | 0.046  | 0.017 |
| rs6957896   | 7  | 132309592 | C | T | 0.503 | -0.011 | 0.002 | -0.009 | 0.017 |
| rs4731925   | 7  | 132664757 | C | T | 0.316 | -0.012 | 0.002 | 0.022  | 0.018 |
| rs35169606  | 8  | 9604066   | T | G | 0.612 | 0.013  | 0.002 | 0.05   | 0.019 |
| rs11783093  | 8  | 27425349  | C | T | 0.839 | 0.023  | 0.003 | -0.007 | 0.023 |
| rs2062882   | 8  | 91839576  | G | A | 0.587 | -0.012 | 0.002 | 0.011  | 0.017 |
| rs72674867  | 8  | 95578201  | A | T | 0.765 | 0.013  | 0.002 | -0.007 | 0.019 |
| rs4543592   | 9  | 3014254   | T | C | 0.52  | -0.012 | 0.002 | -0.033 | 0.017 |
| rs7039819   | 9  | 82430418  | G | A | 0.427 | 0.013  | 0.002 | 0.01   | 0.017 |
| rs1246265   | 9  | 86761745  | T | C | 0.305 | -0.013 | 0.002 | -0.009 | 0.018 |
| rs13296519  | 9  | 128471924 | G | T | 0.606 | -0.014 | 0.002 | -0.01  | 0.017 |
| rs113382419 | 9  | 136463019 | C | A | 0.889 | -0.041 | 0.003 | 0.006  | 0.028 |
| rs11255908  | 10 | 8802912   | T | G | 0.743 | -0.015 | 0.002 | -0.018 | 0.019 |
| rs2675638   | 10 | 63576286  | G | A | 0.581 | 0.012  | 0.002 | 0.004  | 0.017 |
| rs10823968  | 10 | 74738269  | A | T | 0.633 | 0.012  | 0.002 | 0.014  | 0.017 |
| rs17553262  | 10 | 92912773  | A | C | 0.885 | -0.018 | 0.003 | -0.018 | 0.034 |
| rs7077678   | 10 | 104438565 | C | T | 0.623 | 0.012  | 0.002 | -0.015 | 0.017 |
| rs12244388  | 10 | 104640052 | G | A | 0.661 | -0.019 | 0.002 | -0.045 | 0.017 |
| rs3896224   | 10 | 106467853 | A | G | 0.585 | 0.014  | 0.002 | 0.021  | 0.017 |
| rs34866095  | 11 | 16377356  | A | G | 0.686 | -0.012 | 0.002 | 0.006  | 0.018 |
| rs75742406  | 11 | 17070365  | G | A | 0.739 | 0.014  | 0.002 | -0.029 | 0.019 |
| rs17309874  | 11 | 27667236  | G | A | 0.74  | -0.016 | 0.002 | -0.007 | 0.019 |
| rs4391802   | 11 | 28674592  | A | G | 0.707 | 0.015  | 0.002 | 0.031  | 0.018 |
| rs112282219 | 11 | 46632809  | G | A | 0.959 | -0.033 | 0.005 | 0.024  | 0.044 |
| rs9919670   | 11 | 112877304 | G | A | 0.612 | -0.022 | 0.002 | -0.026 | 0.017 |
| rs74086911  | 12 | 50015942  | G | A | 0.925 | 0.021  | 0.004 | -0.006 | 0.032 |
| rs7297175   | 12 | 56473808  | T | C | 0.431 | -0.012 | 0.002 | 0.001  | 0.017 |
| rs10879871  | 12 | 75380511  | T | G | 0.343 | -0.014 | 0.002 | -0.036 | 0.017 |
| rs12831617  | 12 | 84758368  | C | T | 0.764 | -0.013 | 0.002 | -0.03  | 0.019 |
| rs6562474   | 13 | 67332812  | C | G | 0.651 | 0.012  | 0.002 | 0.007  | 0.017 |
| rs7333559   | 13 | 100546450 | G | A | 0.212 | 0.015  | 0.002 | -0.001 | 0.021 |
| rs860326    | 14 | 57342912  | C | T | 0.428 | 0.012  | 0.002 | -0.02  | 0.017 |
| rs7155595   | 14 | 77502546  | A | C | 0.674 | -0.013 | 0.002 | -0.007 | 0.018 |
| rs3742365   | 14 | 104198251 | T | C | 0.595 | -0.016 | 0.002 | 0.022  | 0.017 |
| rs35175834  | 15 | 47680815  | G | A | 0.788 | -0.024 | 0.002 | 0.021  | 0.02  |
| rs28485305  | 15 | 74044197  | C | T | 0.631 | 0.012  | 0.002 | 0.028  | 0.017 |
| rs8042849   | 15 | 78817929  | C | T | 0.342 | 0.028  | 0.002 | 0.026  | 0.017 |
| rs8042134   | 15 | 97514404  | T | G | 0.541 | -0.014 | 0.002 | -0.032 | 0.018 |
| rs6598539   | 15 | 99204483  | T | C | 0.489 | -0.012 | 0.002 | -0.001 | 0.017 |
| rs11861214  | 16 | 746611    | G | T | 0.784 | 0.014  | 0.002 | -0.032 | 0.02  |
| rs12708665  | 16 | 24728227  | A | G | 0.285 | -0.013 | 0.002 | 0.016  | 0.018 |
| rs57611503  | 16 | 31165795  | G | A | 0.485 | 0.011  | 0.002 | 0.009  | 0.018 |
| rs889398    | 16 | 69556715  | C | T | 0.588 | 0.013  | 0.002 | 0.002  | 0.017 |
| rs60952428  | 16 | 75640521  | T | C | 0.909 | 0.019  | 0.003 | 0.001  | 0.029 |
| rs1050847   | 16 | 87443734  | C | T | 0.426 | 0.011  | 0.002 | 0.004  | 0.017 |
| rs369230    | 16 | 89645437  | G | T | 0.308 | -0.013 | 0.002 | -0.013 | 0.022 |
| rs8614      | 17 | 27588806  | C | A | 0.817 | -0.017 | 0.003 | -0.01  | 0.023 |
| rs732083    | 17 | 37834367  | G | A | 0.333 | 0.012  | 0.002 | -0.029 | 0.017 |
| rs9904288   | 17 | 47031973  | T | C | 0.708 | 0.012  | 0.002 | 0.01   | 0.018 |
| rs67596067  | 17 | 50333733  | G | A | 0.649 | -0.013 | 0.002 | -0.008 | 0.019 |
| rs12967855  | 18 | 35138245  | A | G | 0.331 | 0.012  | 0.002 | 0.03   | 0.018 |
| rs62098013  | 18 | 50863861  | G | A | 0.64  | -0.012 | 0.002 | 0.006  | 0.018 |
| rs71367545  | 18 | 77576337  | G | A | 0.791 | -0.015 | 0.002 | -0.04  | 0.021 |
| rs76608582  | 19 | 4474725   | C | A | 0.953 | 0.031  | 0.005 | 0.009  | 0.061 |

|             |    |          |   |   |       |        |       |        |       |
|-------------|----|----------|---|---|-------|--------|-------|--------|-------|
| rs35343344  | 19 | 18471610 | C | A | 0.733 | 0.013  | 0.002 | 0.008  | 0.02  |
| rs4814873   | 20 | 19616429 | C | T | 0.767 | 0.014  | 0.002 | 0.032  | 0.02  |
| rs6119897   | 20 | 31145415 | G | A | 0.762 | -0.018 | 0.002 | 0.01   | 0.019 |
| rs12481282  | 20 | 44761377 | G | C | 0.722 | -0.013 | 0.002 | 0.028  | 0.019 |
| rs348809    | 20 | 59032097 | A | G | 0.348 | -0.012 | 0.002 | 0.019  | 0.017 |
| rs6011779   | 20 | 61984317 | C | T | 0.191 | 0.028  | 0.003 | 0.038  | 0.033 |
| rs147412694 | 21 | 40702786 | G | A | 0.85  | -0.017 | 0.003 | -0.081 | 0.025 |
| rs2838834   | 21 | 46665208 | C | T | 0.699 | -0.013 | 0.002 | -0.022 | 0.018 |
| rs136233    | 22 | 31212410 | A | G | 0.809 | -0.014 | 0.003 | 0.011  | 0.021 |
| rs202645    | 22 | 41798520 | A | G | 0.203 | -0.015 | 0.002 | -0.012 | 0.02  |

<sup>a</sup> The variants together explain 1.2% of the variation in the lifetime smoking index

**Table 4. Age at smoking initiation exposure SNVs and their association with advanced AMD.<sup>a</sup>**

Chr = chromosome; BP = base position (build 37); EA = effect allele; NEA = non-effect allele; EAF = effect allele frequency; SE = standard error.

| SNV        | Chr | BP        | EA | NEA | EAF   | Age of initiation of regular smoking |       | Advanced AMD |       |
|------------|-----|-----------|----|-----|-------|--------------------------------------|-------|--------------|-------|
|            |     |           |    |     |       | Beta                                 | SE    | Beta         | SE    |
| rs72853300 | 2   | 145638766 | T  | C   | 0.153 | 0.019                                | 0.003 | -0.037       | 0.027 |
| rs11915747 | 3   | 85699040  | G  | C   | 0.354 | 0.02                                 | 0.003 | -0.012       | 0.017 |
| rs13136239 | 4   | 140908755 | A  | G   | 0.342 | 0.015                                | 0.003 | 0.015        | 0.017 |
| rs2471711  | 4   | 28589079  | T  | C   | 0.152 | -0.019                               | 0.003 | 0.009        | 0.023 |
| rs624833   | 4   | 2881256   | G  | T   | 0.302 | 0.016                                | 0.003 | 0.005        | 0.018 |
| rs7682598  | 4   | 68000888  | G  | A   | 0.771 | 0.017                                | 0.003 | 0.013        | 0.019 |
| rs11780471 | 8   | 27344719  | A  | G   | 0.06  | 0.033                                | 0.005 | -0.007       | 0.035 |

<sup>a</sup> The variants together explain <1% of the variation in the age of initiation of regular smoking



**Table 5. Alcohol intake per week exposure SNVs and their association with advanced AMD.<sup>a</sup>**

Chr = chromosome; BP = base position (build 37); EA = effect allele; NEA = non-effect allele; EAF = effect allele frequency; SE = standard error.

| SNV        | Chr | BP        | EA | NEA | EAF   | Drinks per week |       | Advanced AMD |       |
|------------|-----|-----------|----|-----|-------|-----------------|-------|--------------|-------|
|            |     |           |    |     |       | Beta            | SE    | Beta         | SE    |
| rs705687   | 1   | 4548453   | G  | A   | 0.785 | -0.011          | 0.002 | -0.011       | 0.02  |
| rs58107686 | 1   | 33837334  | A  | C   | 0.328 | -0.01           | 0.002 | -0.019       | 0.017 |
| rs12088813 | 1   | 66407700  | C  | A   | 0.267 | -0.009          | 0.002 | -0.021       | 0.019 |
| rs5024204  | 1   | 71491890  | T  | A   | 0.278 | 0.01            | 0.002 | -0.008       | 0.018 |
| rs10753661 | 1   | 165119792 | A  | G   | 0.684 | -0.009          | 0.002 | 0.005        | 0.018 |
| rs28680958 | 1   | 173848808 | A  | G   | 0.217 | -0.011          | 0.002 | 0.013        | 0.02  |
| rs823114   | 1   | 205719532 | A  | G   | 0.553 | 0.009           | 0.001 | -0.004       | 0.017 |
| rs77165542 | 2   | 430975    | T  | C   | 0.035 | -0.026          | 0.004 | -0.02        | 0.066 |
| rs1260326  | 2   | 27730940  | C  | T   | 0.601 | 0.021           | 0.001 | -0.038       | 0.017 |
| rs2178197  | 2   | 27860551  | G  | A   | 0.569 | -0.009          | 0.001 | 0.007        | 0.017 |
| rs13383034 | 2   | 45155276  | T  | C   | 0.329 | 0.015           | 0.002 | -0.017       | 0.018 |
| rs13032049 | 2   | 63581507  | G  | A   | 0.283 | 0.01            | 0.002 | -0.041       | 0.018 |
| rs828867   | 2   | 74334462  | A  | G   | 0.545 | 0.009           | 0.001 | -0.006       | 0.019 |
| rs11692435 | 2   | 98275354  | A  | G   | 0.085 | 0.017           | 0.003 | 0.023        | 0.029 |
| rs13024996 | 2   | 144225215 | A  | C   | 0.364 | -0.011          | 0.002 | -0.014       | 0.017 |
| rs72859280 | 2   | 147956293 | T  | G   | 0.036 | 0.023           | 0.004 | -0.021       | 0.05  |
| rs56337305 | 2   | 225475560 | C  | T   | 0.383 | -0.01           | 0.001 | -0.027       | 0.017 |
| rs13094887 | 3   | 70968431  | T  | A   | 0.301 | -0.01           | 0.002 | -0.011       | 0.018 |
| rs62250685 | 3   | 85457240  | G  | A   | 0.614 | -0.014          | 0.002 | 0.006        | 0.017 |
| rs13066454 | 3   | 93994255  | T  | C   | 0.398 | -0.009          | 0.001 | 0.009        | 0.017 |
| rs9838144  | 3   | 131576287 | C  | G   | 0.209 | -0.01           | 0.002 | -0.019       | 0.021 |
| rs2011092  | 3   | 141124607 | C  | T   | 0.339 | -0.009          | 0.002 | 0.079        | 0.017 |
| rs60654199 | 3   | 141267295 | A  | C   | 0.063 | -0.017          | 0.003 | -0.033       | 0.037 |
| rs6787172  | 3   | 158187811 | G  | T   | 0.554 | -0.008          | 0.001 | -0.004       | 0.016 |
| rs3748034  | 4   | 3446091   | T  | G   | 0.143 | -0.012          | 0.002 | -0.039       | 0.023 |
| rs4501255  | 4   | 42151306  | G  | C   | 0.235 | 0.011           | 0.002 | 0.005        | 0.02  |
| rs12499107 | 4   | 99678691  | G  | A   | 0.131 | 0.013           | 0.002 | -0.007       | 0.025 |
| rs1229984  | 4   | 100239319 | C  | T   | 0.963 | 0.151           | 0.004 | 0.112        | 0.04  |
| rs10028756 | 4   | 100254520 | A  | G   | 0.129 | -0.019          | 0.002 | 0.002        | 0.028 |
| rs36052336 | 4   | 100273594 | G  | A   | 0.061 | -0.018          | 0.003 | 0.059        | 0.043 |
| rs2165670  | 4   | 100286085 | A  | G   | 0.106 | 0.023           | 0.002 | 0.000        | 0.028 |
| rs79139602 | 4   | 100444363 | T  | A   | 0.021 | 0.06            | 0.005 | 0.053        | 0.058 |
| rs4699791  | 4   | 101243023 | A  | G   | 0.096 | 0.019           | 0.002 | -0.002       | 0.032 |
| rs13107325 | 4   | 103188709 | T  | C   | 0.072 | -0.028          | 0.003 | -0.009       | 0.031 |
| rs4690727  | 4   | 143648579 | G  | C   | 0.718 | 0.011           | 0.002 | 0.01         | 0.018 |
| rs10004020 | 4   | 152968372 | A  | G   | 0.72  | 0.009           | 0.002 | 0.015        | 0.018 |
| rs4916723  | 5   | 87854395  | C  | A   | 0.416 | -0.01           | 0.001 | 0.011        | 0.017 |
| rs12655091 | 5   | 144412335 | A  | G   | 0.53  | -0.008          | 0.001 | -0.015       | 0.016 |
| rs55872084 | 5   | 155902003 | T  | G   | 0.235 | 0.01            | 0.002 | 0.021        | 0.02  |
| rs10085696 | 7   | 69783020  | G  | A   | 0.186 | -0.011          | 0.002 | 0.009        | 0.021 |
| rs6460047  | 7   | 73042443  | C  | T   | 0.208 | 0.012           | 0.002 | 0.05         | 0.022 |
| rs10236149 | 7   | 98977515  | G  | A   | 0.123 | -0.013          | 0.002 | 0.029        | 0.025 |
| rs35034355 | 7   | 103840115 | A  | G   | 0.521 | -0.008          | 0.001 | -0.005       | 0.016 |
| rs6951574  | 7   | 153489744 | C  | T   | 0.458 | 0.013           | 0.001 | 0.000        | 0.019 |
| rs13250583 | 8   | 20949917  | T  | C   | 0.213 | -0.01           | 0.002 | 0.007        | 0.02  |
| rs1217091  | 8   | 64527399  | C  | T   | 0.812 | 0.012           | 0.002 | 0.013        | 0.021 |
| rs55932213 | 9   | 108755622 | G  | A   | 0.736 | 0.009           | 0.002 | 0.035        | 0.02  |
| rs10978550 | 9   | 109345993 | C  | T   | 0.206 | -0.012          | 0.002 | 0.021        | 0.02  |
| rs7074871  | 10  | 110507806 | A  | G   | 0.255 | -0.009          | 0.002 | -0.006       | 0.019 |
| rs17665139 | 10  | 125093880 | T  | C   | 0.149 | -0.012          | 0.002 | 0.007        | 0.023 |
| rs7950166  | 11  | 8642218   | T  | C   | 0.637 | -0.01           | 0.002 | 0.032        | 0.017 |

|             |    |           |   |   |       |        |       |        |       |
|-------------|----|-----------|---|---|-------|--------|-------|--------|-------|
| rs11030084  | 11 | 27643725  | T | C | 0.184 | -0.011 | 0.002 | -0.036 | 0.021 |
| rs56030824  | 11 | 47397353  | A | G | 0.322 | -0.012 | 0.002 | 0.029  | 0.018 |
| rs10750025  | 11 | 113424042 | T | C | 0.686 | 0.01   | 0.002 | -0.007 | 0.017 |
| rs1713676   | 11 | 113660576 | G | A | 0.522 | -0.008 | 0.001 | -0.009 | 0.016 |
| rs4938230   | 11 | 116075001 | A | C | 0.842 | 0.013  | 0.002 | -0.011 | 0.022 |
| rs682011    | 11 | 121544285 | C | T | 0.559 | 0.008  | 0.001 | 0.013  | 0.017 |
| rs12795042  | 11 | 133658168 | C | A | 0.623 | -0.008 | 0.002 | -0.032 | 0.018 |
| rs10876188  | 12 | 51895882  | T | C | 0.457 | -0.008 | 0.001 | 0.034  | 0.016 |
| rs3809162   | 12 | 54674235  | G | A | 0.397 | 0.009  | 0.001 | -0.014 | 0.017 |
| rs10506274  | 12 | 81601464  | T | G | 0.484 | -0.009 | 0.001 | -0.009 | 0.016 |
| rs4842786   | 12 | 92170791  | A | G | 0.584 | -0.009 | 0.001 | 0.011  | 0.018 |
| rs500321    | 13 | 27124360  | T | A | 0.736 | -0.01  | 0.002 | -0.035 | 0.019 |
| rs1123285   | 14 | 57274519  | G | C | 0.335 | -0.009 | 0.002 | 0.003  | 0.018 |
| rs2180870   | 14 | 58782779  | C | T | 0.135 | -0.012 | 0.002 | -0.016 | 0.024 |
| rs28929474  | 14 | 94844947  | T | C | 0.018 | -0.037 | 0.005 | -0.324 | 0.068 |
| rs11625650  | 14 | 104610138 | A | G | 0.233 | -0.01  | 0.002 | 0.058  | 0.023 |
| rs2472297   | 15 | 75027880  | T | C | 0.249 | 0.011  | 0.002 | 0.061  | 0.02  |
| rs12907323  | 15 | 86796012  | G | A | 0.411 | 0.008  | 0.001 | -0.007 | 0.017 |
| rs2764771   | 16 | 20013793  | A | G | 0.307 | 0.01   | 0.002 | 0.006  | 0.018 |
| rs17177078  | 16 | 24810681  | T | C | 0.063 | -0.022 | 0.003 | 0.043  | 0.034 |
| rs378421    | 16 | 28754684  | A | G | 0.404 | -0.011 | 0.001 | -0.056 | 0.027 |
| rs113443718 | 16 | 29892184  | A | G | 0.305 | -0.01  | 0.002 | -0.014 | 0.018 |
| rs62044525  | 16 | 64872590  | G | C | 0.184 | -0.012 | 0.002 | -0.009 | 0.021 |
| rs7185555   | 16 | 69131281  | C | G | 0.153 | -0.011 | 0.002 | 0.028  | 0.024 |
| rs79616692  | 16 | 72338507  | C | G | 0.108 | 0.016  | 0.002 | 0.017  | 0.027 |
| rs4548913   | 17 | 2209888   | A | G | 0.632 | -0.008 | 0.002 | -0.051 | 0.017 |
| rs3803800   | 17 | 7462969   | G | A | 0.786 | 0.011  | 0.002 | 0.025  | 0.02  |
| rs2854334   | 17 | 29715500  | G | A | 0.615 | 0.009  | 0.001 | 0.02   | 0.019 |
| rs10438820  | 17 | 78524597  | T | C | 0.702 | 0.009  | 0.002 | 0.037  | 0.018 |
| rs9950000   | 18 | 53052169  | T | C | 0.395 | -0.009 | 0.001 | 0.008  | 0.017 |
| rs4092465   | 18 | 55080437  | G | A | 0.635 | -0.008 | 0.002 | 0.028  | 0.024 |
| rs281379    | 19 | 49214274  | A | G | 0.508 | 0.014  | 0.001 | 0.06   | 0.016 |
| rs4815364   | 20 | 25035711  | A | G | 0.616 | 0.009  | 0.001 | -0.01  | 0.017 |
| rs9607814   | 22 | 41946519  | A | C | 0.2   | -0.01  | 0.002 | -0.018 | 0.021 |

<sup>a</sup> The variants together explain 1% of the variation in the number of alcoholic drinks per week

**Table 6. Body mass index exposure SNVs and their association with advanced AMD.**<sup>a</sup> Chr = chromosome; BP = base position (build 37); EA = effect allele; NEA = non-effect allele; EAF = effect allele frequency; SE = standard error.

| SNV         | Chr | BP        | EA | NEA | EAF   | BMI    |       | Advanced AMD |       |
|-------------|-----|-----------|----|-----|-------|--------|-------|--------------|-------|
|             |     |           |    |     |       | Beta   | SE    | Beta         | SE    |
| rs1884429   | 1   | 11112836  | T  | C   | 0.235 | 0.013  | 0.002 | -0.02        | 0.02  |
| rs561136    | 1   | 23345051  | T  | C   | 0.869 | -0.019 | 0.002 | -0.029       | 0.024 |
| rs11577094  | 1   | 38026600  | T  | C   | 0.079 | 0.019  | 0.003 | 0.011        | 0.032 |
| rs112566467 | 1   | 39562627  | T  | C   | 0.207 | 0.018  | 0.002 | -0.007       | 0.022 |
| rs12121950  | 1   | 49710264  | T  | G   | 0.336 | 0.019  | 0.002 | 0.017        | 0.018 |
| rs12140153  | 1   | 62579891  | T  | G   | 0.091 | -0.035 | 0.003 | -0.012       | 0.033 |
| rs6690398   | 1   | 66447394  | A  | G   | 0.55  | 0.013  | 0.002 | 0.008        | 0.017 |
| rs3101336   | 1   | 72751185  | T  | C   | 0.383 | -0.025 | 0.002 | 0.023        | 0.017 |
| rs12049202  | 1   | 77967523  | T  | C   | 0.188 | 0.024  | 0.002 | 0.002        | 0.021 |
| rs2968487   | 1   | 96887370  | T  | C   | 0.277 | 0.018  | 0.002 | 0.001        | 0.018 |
| rs12072739  | 1   | 98315893  | A  | G   | 0.776 | -0.017 | 0.002 | 0.011        | 0.02  |
| rs1730859   | 1   | 107617707 | A  | G   | 0.651 | -0.012 | 0.002 | -0.058       | 0.018 |
| rs17024393  | 1   | 110154688 | T  | C   | 0.969 | -0.064 | 0.005 | -0.076       | 0.049 |
| rs7534091   | 1   | 118864616 | A  | G   | 0.718 | -0.012 | 0.002 | -0.029       | 0.019 |
| rs61813324  | 1   | 156049877 | T  | C   | 0.131 | 0.029  | 0.003 | -0.053       | 0.028 |
| rs61828641  | 1   | 174321997 | A  | G   | 0.109 | 0.022  | 0.003 | -0.024       | 0.025 |
| rs543874    | 1   | 177889480 | A  | G   | 0.779 | -0.048 | 0.002 | 0.022        | 0.021 |
| rs10920678  | 1   | 190239907 | A  | G   | 0.425 | 0.015  | 0.002 | -0.019       | 0.017 |
| rs2400414   | 1   | 194965200 | T  | C   | 0.346 | -0.013 | 0.002 | -0.003       | 0.017 |
| rs2820295   | 1   | 201800868 | A  | G   | 0.327 | 0.024  | 0.002 | 0.049        | 0.018 |
| rs6661316   | 1   | 210095527 | T  | C   | 0.589 | 0.012  | 0.002 | -0.021       | 0.017 |
| rs946824    | 1   | 243684019 | T  | C   | 0.136 | 0.02   | 0.003 | 0.019        | 0.025 |
| rs13021737  | 2   | 632348    | A  | G   | 0.157 | -0.058 | 0.002 | -0.01        | 0.021 |
| rs10929925  | 2   | 6155557   | A  | C   | 0.411 | -0.014 | 0.002 | -0.009       | 0.017 |
| rs7607490   | 2   | 12851120  | A  | G   | 0.11  | 0.016  | 0.003 | -0.011       | 0.028 |
| rs3770799   | 2   | 36788616  | A  | G   | 0.637 | -0.011 | 0.002 | -0.036       | 0.017 |
| rs7561278   | 2   | 48954905  | T  | C   | 0.767 | 0.017  | 0.002 | -0.003       | 0.021 |
| rs930295    | 2   | 50233352  | A  | C   | 0.155 | 0.021  | 0.002 | 0.029        | 0.022 |
| rs4671328   | 2   | 58935282  | T  | G   | 0.45  | 0.021  | 0.002 | 0.008        | 0.017 |
| rs6545714   | 2   | 59307725  | A  | G   | 0.611 | -0.019 | 0.002 | -0.038       | 0.017 |
| rs2861685   | 2   | 67837553  | T  | C   | 0.586 | 0.017  | 0.002 | -0.012       | 0.017 |
| rs12714199  | 2   | 86812549  | T  | C   | 0.615 | -0.014 | 0.002 | -0.002       | 0.017 |
| rs13002946  | 2   | 100801959 | A  | T   | 0.265 | -0.018 | 0.002 | 0.025        | 0.019 |
| rs13033310  | 2   | 133523605 | A  | G   | 0.252 | 0.015  | 0.002 | 0.001        | 0.019 |
| rs1451077   | 2   | 147901207 | A  | G   | 0.578 | -0.017 | 0.002 | 0.004        | 0.017 |
| rs12692596  | 2   | 161265910 | T  | C   | 0.362 | 0.012  | 0.002 | 0.021        | 0.017 |
| rs7588437   | 2   | 181575281 | A  | G   | 0.366 | -0.017 | 0.002 | -0.015       | 0.017 |
| rs7575118   | 2   | 182653725 | T  | C   | 0.156 | 0.014  | 0.002 | 0.007        | 0.026 |
| rs7570446   | 2   | 193801010 | A  | C   | 0.54  | 0.011  | 0.002 | -0.016       | 0.016 |
| rs1470545   | 2   | 205365851 | T  | C   | 0.037 | 0.037  | 0.004 | 0.037        | 0.041 |
| rs11692326  | 2   | 208263279 | T  | C   | 0.23  | 0.015  | 0.002 | 0.021        | 0.02  |
| rs7599312   | 2   | 213413231 | A  | G   | 0.274 | -0.018 | 0.002 | 0.012        | 0.019 |
| rs4973618   | 2   | 229002620 | A  | G   | 0.662 | -0.015 | 0.002 | -0.015       | 0.017 |
| rs6720868   | 2   | 230663576 | T  | C   | 0.308 | 0.015  | 0.002 | -0.045       | 0.018 |
| rs9808302   | 2   | 236854450 | A  | G   | 0.528 | -0.012 | 0.002 | 0.007        | 0.017 |
| rs59302296  | 3   | 9507314   | A  | T   | 0.099 | 0.022  | 0.003 | 0.001        | 0.026 |
| rs10510419  | 3   | 12426936  | T  | G   | 0.147 | -0.017 | 0.002 | -0.044       | 0.023 |
| rs4857968   | 3   | 20714580  | A  | G   | 0.293 | -0.013 | 0.002 | -0.013       | 0.018 |
| rs6804842   | 3   | 25106437  | A  | G   | 0.43  | -0.014 | 0.002 | 0.001        | 0.017 |
| rs28350     | 3   | 42418446  | A  | G   | 0.172 | 0.017  | 0.002 | 0.048        | 0.022 |
| rs1916801   | 3   | 61187046  | A  | T   | 0.616 | 0.017  | 0.002 | -0.006       | 0.017 |
| rs11915371  | 3   | 70539559  | A  | C   | 0.802 | -0.015 | 0.002 | -0.009       | 0.021 |
| rs9818122   | 3   | 85861064  | T  | C   | 0.793 | -0.023 | 0.002 | 0.007        | 0.02  |

|            |   |           |   |   |       |        |       |        |       |
|------------|---|-----------|---|---|-------|--------|-------|--------|-------|
| rs17681451 | 3 | 114399296 | A | G | 0.076 | -0.023 | 0.003 | -0.025 | 0.032 |
| rs6804181  | 3 | 116937546 | A | T | 0.822 | 0.014  | 0.002 | 0.005  | 0.021 |
| rs16851483 | 3 | 141275436 | T | G | 0.072 | 0.035  | 0.003 | -0.029 | 0.034 |
| rs355777   | 3 | 154034950 | C | G | 0.398 | 0.015  | 0.002 | 0.011  | 0.017 |
| rs9826775  | 3 | 156295341 | A | G | 0.851 | 0.016  | 0.002 | -0.003 | 0.023 |
| rs39654    | 3 | 173095123 | A | G | 0.451 | -0.016 | 0.002 | 0.023  | 0.017 |
| rs6443750  | 3 | 181329682 | T | C | 0.199 | -0.015 | 0.002 | 0.065  | 0.033 |
| rs9816226  | 3 | 185834499 | A | T | 0.176 | -0.032 | 0.002 | -0.008 | 0.021 |
| rs7616009  | 3 | 194881756 | A | G | 0.16  | -0.016 | 0.002 | -0.018 | 0.023 |
| rs2051559  | 4 | 3298800   | T | C | 0.859 | -0.017 | 0.003 | 0.031  | 0.025 |
| rs34811474 | 4 | 25408838  | A | G | 0.222 | -0.029 | 0.002 | -0.033 | 0.02  |
| rs10938397 | 4 | 45182527  | A | G | 0.57  | -0.032 | 0.002 | -0.023 | 0.017 |
| rs2192158  | 4 | 55505360  | A | G | 0.449 | 0.014  | 0.002 | -0.002 | 0.017 |
| rs1346841  | 4 | 65651730  | A | G | 0.412 | -0.013 | 0.002 | 0.003  | 0.017 |
| rs35851183 | 4 | 80717182  | A | G | 0.642 | -0.012 | 0.002 | -0.014 | 0.017 |
| rs1481012  | 4 | 89039082  | A | G | 0.89  | 0.019  | 0.003 | 0.008  | 0.027 |
| rs7678054  | 4 | 95093855  | A | G | 0.479 | -0.01  | 0.002 | -0.005 | 0.016 |
| rs13107325 | 4 | 103188709 | T | C | 0.082 | 0.047  | 0.003 | -0.009 | 0.031 |
| rs4834272  | 4 | 113313986 | T | C | 0.685 | -0.011 | 0.002 | 0.01   | 0.018 |
| rs12509234 | 4 | 120319434 | T | C | 0.721 | -0.012 | 0.002 | 0.032  | 0.019 |
| rs2391540  | 4 | 130726833 | A | T | 0.672 | -0.014 | 0.002 | 0.011  | 0.017 |
| rs1451109  | 4 | 137071335 | A | G | 0.685 | -0.016 | 0.002 | -0.024 | 0.018 |
| rs57800857 | 4 | 140863365 | A | C | 0.634 | 0.016  | 0.002 | -0.007 | 0.018 |
| rs17276464 | 4 | 153028860 | T | C | 0.414 | 0.01   | 0.002 | 0.032  | 0.017 |
| rs13110266 | 4 | 162129844 | A | G | 0.404 | -0.012 | 0.002 | 0.002  | 0.017 |
| rs1522569  | 4 | 171632637 | T | G | 0.818 | 0.014  | 0.002 | -0.007 | 0.021 |
| rs1437842  | 4 | 173597016 | A | G | 0.491 | -0.011 | 0.002 | -0.03  | 0.017 |
| rs6850421  | 4 | 180187034 | A | G | 0.456 | 0.011  | 0.002 | -0.012 | 0.017 |
| rs698147   | 5 | 3513485   | A | G | 0.447 | 0.012  | 0.002 | 0.019  | 0.016 |
| rs6890310  | 5 | 27193573  | A | G | 0.292 | -0.012 | 0.002 | 0.002  | 0.019 |
| rs6451675  | 5 | 43110855  | C | G | 0.324 | -0.014 | 0.002 | -0.023 | 0.018 |
| rs4700608  | 5 | 63026280  | T | C | 0.524 | -0.016 | 0.002 | 0.006  | 0.016 |
| rs2112347  | 5 | 75015242  | T | G | 0.63  | 0.028  | 0.002 | 0.041  | 0.017 |
| rs10942267 | 5 | 80841914  | A | G | 0.693 | 0.015  | 0.002 | -0.019 | 0.018 |
| rs1501673  | 5 | 87963600  | A | G | 0.136 | 0.029  | 0.003 | 0.027  | 0.024 |
| rs7713317  | 5 | 95716722  | A | G | 0.72  | -0.017 | 0.002 | 0.004  | 0.018 |
| rs11739877 | 5 | 105876806 | T | C | 0.623 | 0.012  | 0.002 | -0.01  | 0.017 |
| rs288230   | 5 | 107422067 | T | C | 0.839 | 0.024  | 0.002 | -0.002 | 0.022 |
| rs459552   | 5 | 112176756 | A | T | 0.775 | -0.013 | 0.002 | 0.004  | 0.021 |
| rs6864049  | 5 | 124330522 | A | G | 0.489 | -0.012 | 0.002 | -0.031 | 0.017 |
| rs13174863 | 5 | 139080745 | A | G | 0.854 | -0.02  | 0.002 | 0.019  | 0.025 |
| rs7734385  | 5 | 158460212 | A | G | 0.445 | -0.01  | 0.002 | -0.013 | 0.017 |
| rs2861089  | 5 | 164557954 | A | T | 0.381 | 0.011  | 0.002 | 0.006  | 0.017 |
| rs2053682  | 5 | 170599327 | A | C | 0.678 | 0.017  | 0.002 | 0.035  | 0.018 |
| rs6556301  | 5 | 176527577 | T | G | 0.371 | -0.011 | 0.002 | 0.042  | 0.017 |
| rs2228213  | 6 | 12124855  | A | G | 0.337 | -0.014 | 0.002 | 0.002  | 0.017 |
| rs11757278 | 6 | 13180454  | T | C | 0.696 | 0.013  | 0.002 | 0.002  | 0.018 |
| rs3806114  | 6 | 20482335  | A | G | 0.692 | -0.012 | 0.002 | -0.006 | 0.019 |
| rs6932930  | 6 | 34677103  | A | G | 0.785 | -0.026 | 0.002 | 0.012  | 0.02  |
| rs2206277  | 6 | 50798526  | T | C | 0.156 | 0.041  | 0.002 | -0.084 | 0.021 |
| rs816367   | 6 | 53995542  | C | G | 0.649 | -0.011 | 0.002 | 0.003  | 0.017 |
| rs2622274  | 6 | 64240516  | T | G | 0.455 | -0.011 | 0.002 | 0.027  | 0.017 |
| rs7769594  | 6 | 83447813  | T | C | 0.16  | 0.016  | 0.002 | 0.025  | 0.023 |
| rs12206094 | 6 | 108906200 | T | C | 0.29  | -0.014 | 0.002 | -0.023 | 0.018 |
| rs2357760  | 6 | 120213880 | A | G | 0.674 | 0.014  | 0.002 | -0.003 | 0.017 |
| rs1269175  | 6 | 126040435 | A | G | 0.511 | 0.011  | 0.002 | -0.01  | 0.017 |
| rs2246012  | 6 | 131898208 | T | C | 0.851 | -0.016 | 0.002 | -0.053 | 0.023 |
| rs6922607  | 6 | 142703483 | A | G | 0.808 | -0.013 | 0.002 | -0.003 | 0.021 |

|            |    |           |   |   |       |        |       |        |       |
|------------|----|-----------|---|---|-------|--------|-------|--------|-------|
| rs765875   | 6  | 143185683 | T | C | 0.469 | -0.013 | 0.002 | -0.007 | 0.016 |
| rs487152   | 6  | 160774486 | A | C | 0.497 | 0.011  | 0.002 | 0.007  | 0.016 |
| rs13191362 | 6  | 163033350 | A | G | 0.857 | 0.024  | 0.003 | 0.046  | 0.026 |
| rs4721089  | 7  | 1872921   | T | C | 0.783 | 0.017  | 0.002 | 0.015  | 0.02  |
| rs6463489  | 7  | 5542513   | T | C | 0.096 | 0.017  | 0.003 | 0.007  | 0.029 |
| rs4307239  | 7  | 24354300  | A | G | 0.536 | -0.012 | 0.002 | -0.02  | 0.017 |
| rs215614   | 7  | 32347335  | A | G | 0.625 | -0.014 | 0.002 | -0.016 | 0.017 |
| rs10499694 | 7  | 50614173  | A | G | 0.494 | 0.013  | 0.002 | 0.019  | 0.016 |
| rs740157   | 7  | 77055885  | A | G | 0.45  | 0.012  | 0.002 | 0.023  | 0.017 |
| rs1852006  | 7  | 77829768  | A | G | 0.376 | -0.015 | 0.002 | -0.039 | 0.017 |
| rs1030015  | 7  | 78139581  | T | G | 0.542 | 0.011  | 0.002 | -0.004 | 0.016 |
| rs1048303  | 7  | 100804140 | T | C | 0.582 | -0.011 | 0.002 | -0.014 | 0.017 |
| rs1899689  | 7  | 121964349 | T | C | 0.394 | 0.012  | 0.002 | 0.021  | 0.017 |
| rs7802342  | 7  | 137435925 | T | G | 0.705 | -0.012 | 0.002 | -0.01  | 0.021 |
| rs11525873 | 7  | 138817193 | T | C | 0.9   | 0.023  | 0.003 | -0.062 | 0.028 |
| rs2907948  | 7  | 150638484 | A | G | 0.244 | -0.015 | 0.002 | 0.03   | 0.019 |
| rs1658820  | 8  | 4288577   | T | G | 0.239 | 0.013  | 0.002 | 0.02   | 0.02  |
| rs4841504  | 8  | 11024663  | A | C | 0.501 | -0.017 | 0.002 | -0.001 | 0.017 |
| rs4123853  | 8  | 14091025  | T | C | 0.373 | 0.014  | 0.002 | -0.007 | 0.017 |
| rs354508   | 8  | 15535226  | T | C | 0.162 | -0.015 | 0.002 | -0.001 | 0.022 |
| rs1982441  | 8  | 28021769  | T | G | 0.132 | 0.017  | 0.003 | -0.027 | 0.024 |
| rs10954772 | 8  | 30863938  | T | C | 0.319 | 0.016  | 0.002 | 0.008  | 0.018 |
| rs7826312  | 8  | 32400115  | T | C | 0.432 | -0.011 | 0.002 | -0.003 | 0.017 |
| rs36061954 | 8  | 38329650  | T | C | 0.398 | 0.012  | 0.002 | -0.005 | 0.017 |
| rs12681792 | 8  | 62054463  | A | C | 0.202 | 0.015  | 0.002 | 0.002  | 0.022 |
| rs1431659  | 8  | 73439070  | A | G | 0.274 | 0.019  | 0.002 | -0.003 | 0.019 |
| rs17405819 | 8  | 76806584  | T | C | 0.685 | 0.021  | 0.002 | -0.014 | 0.018 |
| rs2196618  | 8  | 85089437  | A | G | 0.263 | -0.014 | 0.002 | -0.02  | 0.019 |
| rs12680842 | 8  | 95582606  | A | G | 0.684 | 0.014  | 0.002 | 0.013  | 0.018 |
| rs1383592  | 8  | 106430676 | A | G | 0.212 | 0.012  | 0.002 | 0.003  | 0.02  |
| rs3808477  | 8  | 116670347 | T | C | 0.274 | -0.018 | 0.002 | 0.01   | 0.019 |
| rs72673947 | 8  | 118884379 | A | G | 0.89  | -0.022 | 0.003 | 0.043  | 0.027 |
| rs1106761  | 8  | 142619234 | A | G | 0.375 | 0.013  | 0.002 | -0.004 | 0.017 |
| rs10099330 | 8  | 143383694 | A | G | 0.538 | -0.012 | 0.002 | -0.006 | 0.017 |
| rs7037266  | 9  | 6942940   | A | C | 0.358 | -0.011 | 0.002 | -0.013 | 0.017 |
| rs4740619  | 9  | 15634326  | T | C | 0.544 | 0.019  | 0.002 | -0.027 | 0.017 |
| rs2183824  | 9  | 28412078  | T | C | 0.314 | 0.023  | 0.002 | 0.002  | 0.018 |
| rs6476617  | 9  | 37200103  | A | G | 0.38  | -0.015 | 0.002 | 0.017  | 0.017 |
| rs2134858  | 9  | 73837155  | T | C | 0.512 | -0.012 | 0.002 | 0.01   | 0.016 |
| rs10116186 | 9  | 80532374  | A | G | 0.459 | -0.012 | 0.002 | 0.006  | 0.017 |
| rs2777768  | 9  | 84186734  | A | G | 0.723 | 0.012  | 0.002 | 0.02   | 0.019 |
| rs7357754  | 9  | 92207308  | A | G | 0.499 | -0.012 | 0.002 | 0.03   | 0.017 |
| rs3811125  | 9  | 94187247  | T | C | 0.281 | -0.015 | 0.002 | 0.027  | 0.02  |
| rs10761247 | 9  | 96403367  | A | G | 0.587 | -0.011 | 0.002 | -0.016 | 0.016 |
| rs6477694  | 9  | 111932342 | T | C | 0.642 | -0.013 | 0.002 | -0.021 | 0.017 |
| rs1928295  | 9  | 120378483 | T | C | 0.571 | 0.013  | 0.002 | -0.033 | 0.016 |
| rs10984756 | 9  | 122651784 | C | G | 0.905 | -0.018 | 0.003 | -0.006 | 0.028 |
| rs3739514  | 9  | 133783025 | A | G | 0.338 | 0.013  | 0.002 | 0.008  | 0.018 |
| rs10858334 | 9  | 137989785 | C | G | 0.848 | -0.015 | 0.003 | -0.044 | 0.027 |
| rs7893571  | 10 | 16750129  | T | G | 0.674 | 0.013  | 0.002 | 0.001  | 0.018 |
| rs1277733  | 10 | 18562538  | T | C | 0.766 | 0.012  | 0.002 | -0.003 | 0.02  |
| rs7084454  | 10 | 21821274  | A | G | 0.309 | 0.02   | 0.002 | 0.012  | 0.018 |
| rs4097319  | 10 | 33860515  | T | G | 0.564 | 0.011  | 0.002 | 0.007  | 0.017 |
| rs12765914 | 10 | 34013507  | T | C | 0.08  | 0.023  | 0.003 | 0.035  | 0.03  |
| rs10823893 | 10 | 53677313  | A | G | 0.407 | 0.012  | 0.002 | 0.03   | 0.017 |
| rs7070670  | 10 | 61842645  | T | C | 0.323 | -0.013 | 0.002 | 0.009  | 0.019 |
| rs12098284 | 10 | 76047464  | T | C | 0.121 | 0.018  | 0.003 | 0.033  | 0.025 |
| rs7899106  | 10 | 87410904  | A | G | 0.95  | -0.033 | 0.004 | 0.033  | 0.039 |

|            |    |           |   |   |       |        |       |        |       |
|------------|----|-----------|---|---|-------|--------|-------|--------|-------|
| rs10887584 | 10 | 88112323  | A | G | 0.448 | 0.013  | 0.002 | -0.007 | 0.017 |
| rs2439823  | 10 | 99778226  | A | G | 0.451 | -0.017 | 0.002 | 0.022  | 0.017 |
| rs34277166 | 10 | 102634853 | A | G | 0.44  | 0.014  | 0.002 | -0.053 | 0.019 |
| rs4290163  | 10 | 104610926 | T | G | 0.398 | 0.013  | 0.002 | 0.039  | 0.017 |
| rs7903146  | 10 | 114758349 | T | C | 0.279 | -0.018 | 0.002 | -0.041 | 0.018 |
| rs845084   | 10 | 125220036 | A | G | 0.267 | 0.014  | 0.002 | 0.025  | 0.019 |
| rs17636031 | 10 | 126594078 | T | C | 0.724 | -0.015 | 0.002 | 0.022  | 0.024 |
| rs4880341  | 10 | 133992689 | T | C | 0.573 | -0.013 | 0.002 | -0.022 | 0.017 |
| rs4256980  | 11 | 8673939   | C | G | 0.331 | -0.019 | 0.002 | -0.029 | 0.017 |
| rs1982350  | 11 | 13350131  | A | G | 0.356 | -0.016 | 0.002 | -0.002 | 0.017 |
| rs5215     | 11 | 17408630  | T | C | 0.631 | 0.011  | 0.002 | -0.028 | 0.017 |
| rs6265     | 11 | 27679916  | T | C | 0.184 | -0.041 | 0.002 | -0.038 | 0.021 |
| rs2065418  | 11 | 30422068  | T | G | 0.646 | 0.014  | 0.002 | -0.015 | 0.017 |
| rs2862996  | 11 | 43653833  | T | G | 0.701 | -0.022 | 0.002 | -0.024 | 0.018 |
| rs7124681  | 11 | 47529947  | A | C | 0.416 | 0.026  | 0.002 | 0.01   | 0.017 |
| rs6591407  | 11 | 56914157  | A | C | 0.198 | -0.012 | 0.002 | -0.016 | 0.021 |
| rs592483   | 11 | 69445173  | T | C | 0.593 | -0.014 | 0.002 | 0.002  | 0.017 |
| rs12282785 | 11 | 76476030  | A | C | 0.22  | -0.016 | 0.002 | -0.038 | 0.02  |
| rs349088   | 11 | 84814393  | A | C | 0.478 | -0.013 | 0.002 | -0.003 | 0.016 |
| rs2605603  | 11 | 93221105  | A | G | 0.481 | -0.01  | 0.002 | 0.017  | 0.017 |
| rs12286929 | 11 | 115022404 | A | G | 0.501 | -0.018 | 0.002 | 0.01   | 0.016 |
| rs76942203 | 11 | 116973247 | A | G | 0.059 | 0.026  | 0.004 | 0.035  | 0.035 |
| rs3825061  | 11 | 118944675 | T | C | 0.386 | 0.014  | 0.002 | -0.031 | 0.017 |
| rs11218510 | 11 | 121922587 | A | G | 0.395 | -0.014 | 0.002 | 0.012  | 0.017 |
| rs7944782  | 11 | 130795698 | T | G | 0.502 | -0.014 | 0.002 | 0.015  | 0.017 |
| rs12364470 | 11 | 134601012 | T | G | 0.854 | -0.019 | 0.002 | -0.009 | 0.026 |
| rs11611246 | 12 | 939480    | T | G | 0.199 | 0.022  | 0.002 | -0.022 | 0.021 |
| rs12422552 | 12 | 14413931  | C | G | 0.269 | -0.013 | 0.002 | 0.042  | 0.019 |
| rs10744146 | 12 | 17212881  | A | G | 0.536 | -0.011 | 0.002 | -0.023 | 0.016 |
| rs11047132 | 12 | 24008435  | T | G | 0.918 | -0.023 | 0.003 | 0.029  | 0.034 |
| rs11170468 | 12 | 39430048  | A | C | 0.783 | 0.013  | 0.002 | 0.006  | 0.019 |
| rs7138803  | 12 | 50247468  | A | G | 0.387 | 0.03   | 0.002 | -0.011 | 0.017 |
| rs7975187  | 12 | 60964108  | A | G | 0.771 | -0.014 | 0.002 | -0.012 | 0.02  |
| rs650198   | 12 | 69674595  | T | C | 0.729 | -0.014 | 0.002 | -0.021 | 0.018 |
| rs11115176 | 12 | 82465797  | T | C | 0.784 | 0.013  | 0.002 | -0.041 | 0.02  |
| rs704061   | 12 | 89771903  | T | C | 0.554 | -0.014 | 0.002 | 0.017  | 0.016 |
| rs11105839 | 12 | 91237920  | A | T | 0.373 | -0.011 | 0.002 | -0.038 | 0.017 |
| rs6539064  | 12 | 103706754 | C | G | 0.747 | 0.019  | 0.002 | 0.007  | 0.019 |
| rs12321904 | 12 | 109989228 | T | G | 0.5   | 0.01   | 0.002 | 0.006  | 0.016 |
| rs12369179 | 12 | 122963550 | T | C | 0.085 | -0.034 | 0.003 | -0.025 | 0.031 |
| rs11836108 | 12 | 133391022 | A | G | 0.296 | 0.011  | 0.002 | -0.018 | 0.018 |
| rs1045411  | 13 | 31033232  | T | C | 0.281 | -0.014 | 0.002 | 0.034  | 0.021 |
| rs9595908  | 13 | 33184288  | T | C | 0.643 | 0.015  | 0.002 | 0.001  | 0.017 |
| rs9603697  | 13 | 40783323  | T | C | 0.318 | 0.013  | 0.002 | 0.009  | 0.018 |
| rs41284828 | 13 | 50963685  | A | G | 0.03  | -0.034 | 0.006 | 0.016  | 0.049 |
| rs12429545 | 13 | 54102206  | A | G | 0.122 | 0.031  | 0.002 | -0.012 | 0.025 |
| rs8181823  | 13 | 65477940  | A | C | 0.234 | -0.013 | 0.002 | 0.001  | 0.019 |
| rs9540493  | 13 | 66205704  | A | G | 0.458 | 0.013  | 0.002 | 0.019  | 0.017 |
| rs4421883  | 13 | 79561962  | T | C | 0.495 | -0.01  | 0.002 | 0.008  | 0.016 |
| rs77432547 | 13 | 86494817  | A | G | 0.723 | -0.017 | 0.002 | -0.004 | 0.019 |
| rs1927790  | 13 | 96922191  | T | C | 0.606 | -0.014 | 0.002 | -0.012 | 0.017 |
| rs1536053  | 13 | 111982291 | T | C | 0.31  | -0.012 | 0.002 | 0.01   | 0.02  |
| rs10132280 | 14 | 25928179  | A | C | 0.311 | -0.021 | 0.002 | -0.037 | 0.019 |
| rs872281   | 14 | 40834177  | T | C | 0.176 | -0.015 | 0.002 | 0.005  | 0.023 |
| rs1491905  | 14 | 47296286  | T | C | 0.473 | 0.015  | 0.002 | 0.007  | 0.017 |
| rs217669   | 14 | 62360075  | T | C | 0.722 | -0.017 | 0.002 | -0.002 | 0.019 |
| rs1954494  | 14 | 62593297  | T | C | 0.561 | 0.01   | 0.002 | 0.003  | 0.016 |
| rs7144011  | 14 | 79940383  | T | G | 0.233 | 0.026  | 0.002 | -0.025 | 0.02  |

|            |    |           |   |   |       |        |       |        |       |
|------------|----|-----------|---|---|-------|--------|-------|--------|-------|
| rs1951455  | 14 | 91512339  | T | C | 0.281 | -0.015 | 0.002 | -0.012 | 0.018 |
| rs942066   | 14 | 94031914  | A | G | 0.373 | -0.02  | 0.002 | -0.03  | 0.017 |
| rs4906263  | 14 | 103249127 | C | G | 0.656 | -0.018 | 0.002 | -0.002 | 0.018 |
| rs709400   | 14 | 104149475 | A | G | 0.621 | 0.015  | 0.002 | -0.004 | 0.017 |
| rs7181610  | 15 | 35826859  | A | T | 0.855 | 0.015  | 0.003 | 0.002  | 0.024 |
| rs11636611 | 15 | 36391965  | T | C | 0.498 | 0.01   | 0.002 | 0.019  | 0.016 |
| rs6493498  | 15 | 51754451  | T | C | 0.447 | 0.014  | 0.002 | -0.036 | 0.017 |
| rs8024806  | 15 | 53473990  | T | C | 0.937 | 0.025  | 0.004 | 0.028  | 0.034 |
| rs12438629 | 15 | 62122539  | C | G | 0.968 | 0.035  | 0.005 | 0.021  | 0.054 |
| rs1996120  | 15 | 68181534  | A | G | 0.423 | -0.017 | 0.002 | -0.009 | 0.017 |
| rs11856579 | 15 | 78012688  | A | G | 0.261 | -0.016 | 0.002 | 0.009  | 0.019 |
| rs11633626 | 15 | 95271378  | A | C | 0.631 | -0.016 | 0.002 | -0.002 | 0.017 |
| rs2715423  | 15 | 99511873  | A | G | 0.281 | -0.012 | 0.002 | 0.005  | 0.018 |
| rs11866815 | 16 | 387867    | T | C | 0.257 | -0.015 | 0.002 | -0.021 | 0.019 |
| rs2601777  | 16 | 4035068   | A | G | 0.386 | -0.014 | 0.002 | 0.012  | 0.017 |
| rs194809   | 16 | 23804956  | A | G | 0.187 | 0.013  | 0.002 | 0.008  | 0.021 |
| rs2342892  | 16 | 24540806  | T | G | 0.486 | 0.013  | 0.002 | -0.042 | 0.017 |
| rs7498665  | 16 | 28883241  | A | G | 0.618 | -0.029 | 0.002 | 0.026  | 0.017 |
| rs4609871  | 16 | 29932064  | T | C | 0.54  | 0.022  | 0.002 | -0.022 | 0.017 |
| rs9937053  | 16 | 53799507  | A | G | 0.437 | 0.072  | 0.002 | -0.029 | 0.016 |
| rs11075489 | 16 | 62803841  | T | C | 0.474 | -0.012 | 0.002 | -0.01  | 0.017 |
| rs889398   | 16 | 69556715  | T | C | 0.415 | -0.02  | 0.002 | -0.002 | 0.017 |
| rs12449219 | 16 | 77261943  | C | G | 0.856 | -0.016 | 0.003 | 0.033  | 0.024 |
| rs12922346 | 16 | 82438337  | C | G | 0.264 | 0.013  | 0.002 | -0.016 | 0.02  |
| rs7206608  | 16 | 82872628  | C | G | 0.675 | -0.013 | 0.002 | 0.025  | 0.018 |
| rs3923783  | 17 | 1843189   | A | C | 0.178 | -0.022 | 0.002 | 0.046  | 0.022 |
| rs1320251  | 17 | 21264396  | T | C | 0.457 | -0.018 | 0.002 | -0.014 | 0.017 |
| rs3930349  | 17 | 31475545  | A | C | 0.209 | -0.014 | 0.002 | -0.018 | 0.02  |
| rs1106908  | 17 | 34942595  | A | G | 0.445 | -0.016 | 0.002 | -0.009 | 0.017 |
| rs6607337  | 17 | 35057373  | T | C | 0.298 | -0.012 | 0.002 | -0.03  | 0.018 |
| rs11655587 | 17 | 47140794  | T | C | 0.357 | -0.021 | 0.002 | -0.017 | 0.018 |
| rs8075273  | 17 | 61728881  | A | C | 0.288 | -0.014 | 0.002 | -0.011 | 0.018 |
| rs2619976  | 17 | 71754545  | T | C | 0.401 | 0.011  | 0.002 | -0.026 | 0.017 |
| rs3744017  | 17 | 73871467  | A | G | 0.193 | 0.014  | 0.002 | 0.037  | 0.021 |
| rs12939549 | 17 | 78611724  | A | G | 0.557 | 0.018  | 0.002 | -0.018 | 0.017 |
| rs7238896  | 18 | 1840658   | A | G | 0.858 | -0.022 | 0.003 | 0.002  | 0.024 |
| rs891387   | 18 | 21103909  | T | C | 0.495 | 0.021  | 0.002 | -0.034 | 0.017 |
| rs1356506  | 18 | 40708038  | T | C | 0.629 | 0.014  | 0.002 | 0.02   | 0.017 |
| rs7239114  | 18 | 45921214  | A | G | 0.541 | 0.012  | 0.002 | -0.016 | 0.021 |
| rs6567160  | 18 | 57829135  | T | C | 0.752 | -0.055 | 0.002 | 0.03   | 0.02  |
| rs594821   | 18 | 76745589  | T | C | 0.091 | -0.019 | 0.003 | -0.027 | 0.031 |
| rs56356382 | 19 | 4064057   | T | C | 0.805 | 0.022  | 0.002 | 0.008  | 0.022 |
| rs273505   | 19 | 18217147  | T | C | 0.578 | -0.017 | 0.002 | -0.024 | 0.017 |
| rs12462975 | 19 | 30272202  | A | G | 0.324 | 0.019  | 0.002 | -0.024 | 0.018 |
| rs10518269 | 19 | 31028666  | T | C | 0.165 | -0.017 | 0.002 | -0.009 | 0.022 |
| rs11672660 | 19 | 46180184  | T | C | 0.187 | -0.034 | 0.002 | -0.004 | 0.02  |
| rs12151152 | 19 | 47563532  | A | G | 0.409 | -0.021 | 0.002 | -0.01  | 0.019 |
| rs1884389  | 20 | 1410582   | T | C | 0.439 | -0.011 | 0.002 | 0.025  | 0.017 |
| rs615568   | 20 | 3008775   | T | G | 0.52  | -0.01  | 0.002 | -0.012 | 0.017 |
| rs1884897  | 20 | 6612832   | A | G | 0.375 | -0.018 | 0.002 | 0.015  | 0.017 |
| rs1409818  | 20 | 21381121  | T | C | 0.107 | 0.02   | 0.003 | -0.033 | 0.027 |
| rs8122855  | 20 | 25192049  | A | G | 0.338 | 0.014  | 0.002 | 0.014  | 0.017 |
| rs16989232 | 20 | 39291784  | A | G | 0.386 | 0.012  | 0.002 | 0.01   | 0.017 |
| rs17201143 | 20 | 50402079  | T | C | 0.305 | -0.011 | 0.002 | -0.011 | 0.018 |
| rs17806224 | 20 | 51065854  | A | G | 0.181 | -0.026 | 0.002 | 0.022  | 0.022 |
| rs6512302  | 20 | 62691550  | C | G | 0.739 | 0.013  | 0.002 | -0.006 | 0.02  |
| rs2832283  | 21 | 30690558  | A | G | 0.225 | 0.012  | 0.002 | -0.02  | 0.022 |
| rs8134638  | 21 | 40644170  | T | C | 0.627 | -0.013 | 0.002 | 0.002  | 0.018 |

|            |    |          |   |   |       |        |       |        |       |
|------------|----|----------|---|---|-------|--------|-------|--------|-------|
| rs427943   | 21 | 46570896 | A | C | 0.429 | -0.018 | 0.002 | 0.007  | 0.017 |
| rs12628891 | 22 | 38317137 | T | C | 0.319 | -0.012 | 0.002 | -0.039 | 0.018 |
| rs12628051 | 22 | 40654276 | T | C | 0.641 | 0.016  | 0.002 | -0.02  | 0.017 |

<sup>a</sup> The variants together explain 4% of the variation in BMI



**eTable 7. Systolic blood pressure exposure SNVs and their association with advanced AMD.<sup>a</sup>**

Chr = chromosome; BP = base position (build 37); EA = effect allele; NEA = non-effect allele; EAF = effect allele frequency; SE = standard error.

| SNV         | Chr | BP        | EA | NEA | EAF   | Systolic Blood Pressure |       | Advanced AMD |       |
|-------------|-----|-----------|----|-----|-------|-------------------------|-------|--------------|-------|
|             |     |           |    |     |       | Beta                    | SE    | Beta         | SE    |
| rs7546498   | 1   | 1740255   | G  | T   | 0.505 | 0.257                   | 0.039 | 0.006        | 0.017 |
| rs783621    | 1   | 42368035  | A  | G   | 0.446 | 0.289                   | 0.038 | 0.005        | 0.017 |
| rs2404715   | 1   | 57008778  | C  | T   | 0.909 | 0.4                     | 0.066 | -0.021       | 0.03  |
| rs60199046  | 1   | 59663341  | A  | G   | 0.729 | 0.24                    | 0.043 | 0.005        | 0.018 |
| rs786919    | 1   | 89281529  | A  | G   | 0.395 | 0.262                   | 0.039 | 0.04         | 0.017 |
| rs13420463  | 2   | 37517566  | A  | G   | 0.77  | 0.282                   | 0.044 | 0.022        | 0.02  |
| rs13403122  | 2   | 43078758  | C  | T   | 0.721 | 0.25                    | 0.043 | 0.002        | 0.019 |
| rs3731818   | 2   | 86368804  | G  | A   | 0.676 | 0.24                    | 0.041 | 0.006        | 0.018 |
| rs13024657  | 2   | 175472839 | C  | T   | 0.835 | -0.296                  | 0.054 | 0.022        | 0.023 |
| rs6434404   | 2   | 191494411 | A  | G   | 0.308 | 0.311                   | 0.043 | -0.018       | 0.019 |
| rs1250247   | 2   | 216299629 | C  | G   | 0.263 | 0.31                    | 0.044 | -0.022       | 0.019 |
| rs1063281   | 2   | 218668732 | C  | T   | 0.392 | 0.247                   | 0.039 | -0.01        | 0.017 |
| rs7590201   | 2   | 227192443 | G  | T   | 0.45  | -0.216                  | 0.039 | -0.025       | 0.017 |
| rs12630213  | 3   | 14954411  | C  | T   | 0.348 | 0.276                   | 0.04  | 0.002        | 0.018 |
| rs12636552  | 3   | 70972466  | A  | G   | 0.676 | 0.241                   | 0.041 | 0.007        | 0.017 |
| rs6803322   | 3   | 84986088  | C  | A   | 0.675 | 0.228                   | 0.042 | 0.002        | 0.018 |
| rs4141663   | 3   | 124551967 | C  | T   | 0.57  | 0.258                   | 0.038 | 0.018        | 0.017 |
| rs9844972   | 3   | 150097635 | G  | C   | 0.921 | -0.441                  | 0.077 | -0.003       | 0.034 |
| rs113161639 | 3   | 154615819 | G  | T   | 0.902 | 0.451                   | 0.065 | 0.081        | 0.03  |
| rs2178452   | 3   | 160370160 | G  | A   | 0.671 | 0.259                   | 0.04  | 0.021        | 0.018 |
| rs13104866  | 4   | 38402183  | G  | A   | 0.481 | 0.278                   | 0.038 | 0.002        | 0.017 |
| rs12504699  | 4   | 48934298  | G  | A   | 0.637 | 0.221                   | 0.039 | 0.005        | 0.017 |
| rs55940751  | 4   | 77365891  | C  | T   | 0.567 | 0.216                   | 0.039 | -0.049       | 0.017 |
| rs13112725  | 4   | 106911742 | G  | C   | 0.242 | -0.297                  | 0.044 | 0.022        | 0.02  |
| rs7665304   | 4   | 109025379 | A  | C   | 0.413 | 0.22                    | 0.039 | 0.022        | 0.017 |
| rs66887589  | 4   | 120509279 | T  | C   | 0.507 | -0.214                  | 0.038 | -0.025       | 0.017 |
| rs893929    | 4   | 144187380 | G  | A   | 0.547 | 0.233                   | 0.039 | -0.035       | 0.017 |
| rs303343    | 5   | 15312553  | C  | T   | 0.571 | -0.229                  | 0.039 | -0.005       | 0.017 |
| rs1694068   | 5   | 53283630  | T  | A   | 0.392 | -0.245                  | 0.04  | 0.021        | 0.017 |
| rs17286052  | 5   | 87430302  | A  | G   | 0.845 | 0.36                    | 0.055 | 0.058        | 0.024 |
| rs4475250   | 5   | 114375552 | G  | A   | 0.556 | 0.243                   | 0.038 | 0.009        | 0.017 |
| rs6595838   | 5   | 127868199 | G  | A   | 0.71  | -0.267                  | 0.042 | 0.000        | 0.018 |
| rs2050663   | 6   | 79753394  | T  | C   | 0.484 | -0.229                  | 0.039 | 0.049        | 0.017 |
| rs35410524  | 6   | 96885405  | C  | T   | 0.804 | -0.305                  | 0.049 | -0.017       | 0.021 |
| rs12670854  | 7   | 1731866   | A  | G   | 0.888 | 0.36                    | 0.063 | 0.017        | 0.028 |
| rs17423264  | 7   | 108090255 | C  | T   | 0.907 | 0.366                   | 0.067 | -0.006       | 0.034 |
| rs6957161   | 7   | 131361319 | A  | G   | 0.253 | 0.256                   | 0.043 | -0.03        | 0.019 |
| rs80073370  | 8   | 19833156  | A  | T   | 0.917 | 0.404                   | 0.07  | 0.012        | 0.031 |
| rs7008914   | 8   | 25880400  | T  | C   | 0.748 | 0.238                   | 0.044 | 0.013        | 0.02  |
| rs11993898  | 8   | 51936632  | T  | C   | 0.822 | -0.326                  | 0.049 | 0.015        | 0.022 |
| rs112875651 | 8   | 126506694 | G  | A   | 0.621 | 0.226                   | 0.04  | -0.036       | 0.017 |
| rs76735299  | 8   | 142396481 | G  | A   | 0.915 | -0.429                  | 0.078 | -0.015       | 0.033 |
| rs62524579  | 8   | 144060955 | G  | A   | 0.476 | 0.244                   | 0.039 | 0.006        | 0.017 |
| rs7041664   | 9   | 8010674   | C  | A   | 0.717 | -0.247                  | 0.043 | 0.014        | 0.019 |
| rs28663144  | 9   | 113198891 | A  | C   | 0.962 | -0.694                  | 0.105 | -0.004       | 0.043 |
| rs10818775  | 9   | 125755571 | C  | T   | 0.886 | 0.332                   | 0.056 | 0.017        | 0.026 |
| rs1848797   | 10  | 64552934  | A  | G   | 0.611 | 0.265                   | 0.039 | -0.009       | 0.017 |
| rs4110517   | 10  | 96650328  | A  | G   | 0.216 | -0.282                  | 0.046 | 0.022        | 0.02  |
| rs4551692   | 10  | 102556453 | G  | A   | 0.111 | -0.419                  | 0.062 | -0.053       | 0.032 |
| rs34872471  | 10  | 114754071 | T  | C   | 0.702 | -0.25                   | 0.042 | 0.041        | 0.018 |
| rs360158    | 11  | 9753601   | G  | A   | 0.41  | -0.301                  | 0.039 | -0.013       | 0.017 |

|            |    |           |   |   |       |        |       |        |       |
|------------|----|-----------|---|---|-------|--------|-------|--------|-------|
| rs2585810  | 11 | 28483787  | G | A | 0.657 | -0.22  | 0.04  | 0.013  | 0.017 |
| rs7107356  | 11 | 47676170  | A | G | 0.49  | -0.309 | 0.038 | 0.01   | 0.016 |
| rs61448762 | 11 | 48923756  | G | A | 0.879 | 0.358  | 0.061 | 0.01   | 0.03  |
| rs685149   | 11 | 57657413  | A | G | 0.343 | -0.311 | 0.042 | 0.022  | 0.018 |
| rs1938598  | 11 | 58413910  | T | C | 0.755 | 0.33   | 0.044 | -0.008 | 0.019 |
| rs7927515  | 11 | 76125330  | C | A | 0.651 | -0.235 | 0.04  | 0.006  | 0.017 |
| rs2289125  | 11 | 89224453  | A | C | 0.22  | -0.274 | 0.045 | 0.055  | 0.021 |
| rs7951348  | 11 | 107081841 | C | T | 0.522 | -0.252 | 0.038 | -0.01  | 0.017 |
| rs11168244 | 12 | 48202941  | C | T | 0.798 | 0.318  | 0.05  | -0.02  | 0.022 |
| rs7977389  | 12 | 49981722  | T | C | 0.892 | 0.381  | 0.061 | -0.003 | 0.026 |
| rs10747570 | 12 | 50509937  | A | G | 0.393 | 0.256  | 0.04  | -0.024 | 0.017 |
| rs17210898 | 12 | 51056511  | G | A | 0.96  | 0.556  | 0.101 | -0.066 | 0.043 |
| rs10784502 | 12 | 66343810  | C | T | 0.479 | -0.235 | 0.038 | -0.014 | 0.016 |
| rs9565436  | 13 | 36213631  | A | C | 0.871 | -0.303 | 0.054 | -0.014 | 0.024 |
| rs3011549  | 13 | 113634937 | A | C | 0.293 | 0.326  | 0.048 | -0.005 | 0.018 |
| rs9314907  | 13 | 115015163 | C | T | 0.767 | -0.292 | 0.045 | 0.016  | 0.02  |
| rs8904     | 14 | 35871217  | G | A | 0.625 | -0.259 | 0.039 | 0.000  | 0.017 |
| rs7161323  | 14 | 53366149  | C | T | 0.394 | -0.275 | 0.042 | 0.038  | 0.018 |
| rs937213   | 15 | 40322124  | T | C | 0.589 | 0.256  | 0.04  | 0.028  | 0.018 |
| rs2759308  | 15 | 81016227  | G | A | 0.523 | -0.276 | 0.039 | -0.017 | 0.017 |
| rs12596053 | 16 | 4946794   | A | C | 0.439 | -0.275 | 0.039 | -0.021 | 0.017 |
| rs9935770  | 16 | 21091291  | C | T | 0.57  | 0.223  | 0.038 | -0.006 | 0.017 |
| rs200541   | 16 | 24733141  | A | G | 0.193 | -0.281 | 0.049 | 0.007  | 0.021 |
| rs56249585 | 16 | 65265702  | C | T | 0.47  | -0.373 | 0.064 | -0.005 | 0.017 |
| rs35261357 | 16 | 75444572  | C | T | 0.438 | -0.265 | 0.039 | -0.054 | 0.017 |
| rs4295     | 17 | 61556298  | C | G | 0.393 | 0.24   | 0.042 | 0.015  | 0.017 |
| rs7225219  | 17 | 62407559  | T | A | 0.349 | -0.248 | 0.042 | 0.023  | 0.017 |
| rs4788913  | 17 | 73950216  | G | A | 0.355 | -0.283 | 0.04  | 0.017  | 0.017 |
| rs8073626  | 17 | 76790279  | C | T | 0.47  | 0.217  | 0.038 | -0.005 | 0.017 |
| rs12606620 | 18 | 42008097  | G | T | 0.696 | 0.292  | 0.042 | 0.02   | 0.019 |
| rs2193635  | 18 | 43096236  | C | T | 0.818 | -0.274 | 0.048 | 0.006  | 0.021 |
| rs167479   | 19 | 11526765  | G | T | 0.545 | 0.41   | 0.043 | 0.016  | 0.017 |
| rs8105753  | 19 | 31927547  | A | C | 0.615 | 0.249  | 0.04  | 0.06   | 0.019 |
| rs6129880  | 20 | 40251829  | T | G | 0.805 | 0.264  | 0.047 | 0.012  | 0.021 |
| rs6031435  | 20 | 42797358  | A | G | 0.541 | -0.214 | 0.038 | 0.001  | 0.017 |
| rs6090040  | 20 | 62692060  | A | C | 0.44  | 0.265  | 0.044 | 0.01   | 0.017 |
| rs13050325 | 21 | 16343812  | A | G | 0.755 | -0.258 | 0.044 | 0.033  | 0.02  |
| rs34887403 | 22 | 29151150  | G | A | 0.851 | -0.304 | 0.055 | -0.013 | 0.024 |

<sup>a</sup> The variants together explain 1.1% of the variation in systolic blood pressure

**eTable 8. Diastolic blood pressure exposure SNVs and their association with advanced AMD.<sup>a</sup>**

Chr = chromosome; BP = base position (build 37); EA = effect allele; NEA = non-effect allele; EAF = effect allele frequency; SE = standard error.

| SNV         | Chr | BP        | EA | NEA | EAF   | Diastolic Blood Pressure |       | Advanced AMD |       |
|-------------|-----|-----------|----|-----|-------|--------------------------|-------|--------------|-------|
|             |     |           |    |     |       | Beta                     | SE    | Beta         | SE    |
| rs7546498   | 1   | 1740255   | G  | T   | 0.505 | 0.147                    | 0.024 | 0.006        | 0.017 |
| rs11102916  | 1   | 115836746 | C  | A   | 0.982 | -0.575                   | 0.084 | 0.074        | 0.063 |
| rs12405515  | 1   | 172357441 | G  | T   | 0.422 | 0.17                     | 0.024 | -0.023       | 0.017 |
| rs17046596  | 1   | 217722449 | A  | C   | 0.735 | -0.151                   | 0.027 | -0.004       | 0.019 |
| rs4653889   | 1   | 228112121 | A  | G   | 0.477 | 0.152                    | 0.024 | 0.01         | 0.017 |
| rs6428947   | 1   | 236326005 | C  | G   | 0.836 | 0.205                    | 0.031 | 0.025        | 0.023 |
| rs6429422   | 1   | 243472801 | T  | G   | 0.675 | -0.249                   | 0.025 | 0.044        | 0.018 |
| rs10198275  | 2   | 25130542  | A  | C   | 0.568 | 0.135                    | 0.023 | 0.007        | 0.017 |
| rs13403122  | 2   | 43078758  | C  | T   | 0.721 | 0.195                    | 0.027 | 0.002        | 0.019 |
| rs1876487   | 2   | 73114352  | A  | C   | 0.273 | -0.162                   | 0.027 | -0.034       | 0.02  |
| rs3923097   | 2   | 124020790 | T  | A   | 0.936 | 0.273                    | 0.048 | 0.04         | 0.034 |
| rs58117425  | 2   | 145681570 | G  | A   | 0.774 | -0.192                   | 0.028 | 0.02         | 0.02  |
| rs4972805   | 2   | 177012570 | C  | T   | 0.68  | 0.143                    | 0.025 | -0.008       | 0.018 |
| rs1063281   | 2   | 218668732 | C  | T   | 0.392 | 0.17                     | 0.024 | -0.01        | 0.017 |
| rs7590201   | 2   | 227192443 | G  | T   | 0.45  | -0.138                   | 0.024 | -0.025       | 0.017 |
| rs12630213  | 3   | 14954411  | C  | T   | 0.348 | 0.153                    | 0.025 | 0.002        | 0.018 |
| rs76398786  | 3   | 48731450  | C  | T   | 0.961 | -0.382                   | 0.067 | 0.02         | 0.052 |
| rs3749237   | 3   | 49770032  | G  | A   | 0.689 | -0.165                   | 0.025 | 0.033        | 0.018 |
| rs2236973   | 3   | 50474284  | T  | C   | 0.833 | -0.182                   | 0.033 | 0.046        | 0.024 |
| rs9845655   | 3   | 56701328  | T  | C   | 0.734 | 0.161                    | 0.026 | -0.053       | 0.019 |
| rs1053711   | 3   | 57743246  | G  | A   | 0.691 | 0.153                    | 0.026 | 0.008        | 0.018 |
| rs6795735   | 3   | 64705365  | C  | T   | 0.563 | 0.159                    | 0.023 | -0.125       | 0.017 |
| rs9882772   | 3   | 122110149 | T  | C   | 0.58  | -0.133                   | 0.023 | -0.027       | 0.017 |
| rs9864898   | 3   | 138111751 | C  | T   | 0.843 | -0.19                    | 0.032 | 0.024        | 0.023 |
| rs113161639 | 3   | 154615819 | G  | T   | 0.902 | 0.288                    | 0.04  | 0.081        | 0.03  |
| rs4686683   | 3   | 185307363 | T  | G   | 0.59  | -0.172                   | 0.024 | -0.017       | 0.017 |
| rs13112725  | 4   | 106911742 | G  | C   | 0.242 | -0.15                    | 0.027 | 0.022        | 0.02  |
| rs66887589  | 4   | 120509279 | T  | C   | 0.507 | -0.206                   | 0.023 | -0.025       | 0.017 |
| rs168643    | 5   | 50935900  | T  | C   | 0.355 | 0.139                    | 0.025 | -0.044       | 0.017 |
| rs111304266 | 5   | 56589542  | C  | G   | 0.968 | -0.37                    | 0.067 | 0.067        | 0.054 |
| rs258494    | 5   | 75038718  | C  | G   | 0.379 | 0.216                    | 0.024 | -0.015       | 0.018 |
| rs17286052  | 5   | 87430302  | A  | G   | 0.845 | 0.188                    | 0.034 | 0.058        | 0.024 |
| rs17082391  | 5   | 91900785  | C  | G   | 0.971 | 0.375                    | 0.066 | -0.063       | 0.052 |
| rs4475250   | 5   | 114375552 | G  | A   | 0.556 | 0.136                    | 0.023 | 0.009        | 0.017 |
| rs7734334   | 5   | 131815004 | C  | A   | 0.671 | -0.154                   | 0.025 | -0.017       | 0.018 |
| rs72812846  | 5   | 173377636 | T  | A   | 0.735 | 0.202                    | 0.027 | 0.007        | 0.02  |
| rs169287    | 6   | 27854760  | C  | A   | 0.841 | 0.215                    | 0.031 | -0.049       | 0.023 |
| rs210156    | 6   | 33517362  | A  | G   | 0.352 | -0.148                   | 0.025 | 0.012        | 0.017 |
| rs1544935   | 6   | 39124448  | T  | G   | 0.783 | 0.176                    | 0.029 | 0.018        | 0.02  |
| rs13205180  | 6   | 51832494  | C  | T   | 0.524 | -0.143                   | 0.024 | 0.018        | 0.017 |
| rs2050663   | 6   | 79753394  | T  | C   | 0.484 | -0.174                   | 0.024 | 0.049        | 0.017 |
| rs36061333  | 6   | 116311763 | C  | G   | 0.772 | 0.16                     | 0.029 | 0.041        | 0.02  |
| rs1761870   | 6   | 117264985 | G  | A   | 0.176 | 0.175                    | 0.03  | 0.027        | 0.022 |
| rs1630266   | 6   | 118612943 | G  | A   | 0.914 | -0.252                   | 0.042 | -0.021       | 0.029 |
| rs4709746   | 6   | 164133001 | C  | T   | 0.864 | 0.19                     | 0.035 | 0.038        | 0.025 |
| rs903432    | 6   | 166175471 | A  | G   | 0.931 | 0.313                    | 0.045 | -0.017       | 0.033 |
| rs11486794  | 7   | 2491918   | C  | T   | 0.851 | 0.219                    | 0.036 | 0.003        | 0.024 |
| rs34594435  | 7   | 72977249  | C  | T   | 0.818 | 0.183                    | 0.03  | -0.022       | 0.021 |
| rs76627715  | 7   | 80387316  | T  | C   | 0.879 | 0.216                    | 0.035 | -0.038       | 0.027 |
| rs1015538   | 7   | 99626035  | A  | G   | 0.325 | 0.137                    | 0.025 | -0.051       | 0.018 |
| rs11556924  | 7   | 129663496 | C  | T   | 0.639 | 0.181                    | 0.025 | 0.024        | 0.017 |

|             |    |           |   |   |       |        |       |        |       |
|-------------|----|-----------|---|---|-------|--------|-------|--------|-------|
| rs6957161   | 7  | 131361319 | A | G | 0.253 | 0.157  | 0.026 | -0.03  | 0.019 |
| rs111630016 | 7  | 158048396 | C | T | 0.952 | 0.324  | 0.059 | 0.041  | 0.042 |
| rs2280861   | 8  | 23404785  | A | G | 0.754 | -0.173 | 0.027 | -0.014 | 0.019 |
| rs10103353  | 8  | 82849452  | C | T | 0.592 | 0.147  | 0.024 | 0.005  | 0.017 |
| rs62524579  | 8  | 144060955 | G | A | 0.476 | 0.147  | 0.024 | 0.006  | 0.017 |
| rs507666    | 9  | 136149399 | G | A | 0.805 | 0.169  | 0.03  | -0.038 | 0.02  |
| rs10751962  | 10 | 4172711   | C | T | 0.098 | -0.219 | 0.04  | 0.051  | 0.031 |
| rs2246438   | 10 | 45273079  | G | A | 0.723 | 0.16   | 0.026 | 0.024  | 0.018 |
| rs1848797   | 10 | 64552934  | A | G | 0.611 | 0.191  | 0.024 | -0.009 | 0.017 |
| rs4551692   | 10 | 102556453 | G | A | 0.111 | -0.255 | 0.038 | -0.053 | 0.032 |
| rs17617337  | 10 | 121426884 | C | T | 0.788 | 0.172  | 0.029 | 0.015  | 0.02  |
| rs360158    | 11 | 9753601   | G | A | 0.41  | -0.165 | 0.024 | -0.013 | 0.017 |
| rs7928655   | 11 | 13300252  | C | G | 0.3   | -0.143 | 0.025 | 0.005  | 0.018 |
| rs11030119  | 11 | 27728102  | G | A | 0.716 | 0.18   | 0.026 | -0.015 | 0.018 |
| rs61879810  | 11 | 31821467  | A | G | 0.153 | 0.198  | 0.033 | 0.019  | 0.024 |
| rs7107356   | 11 | 47676170  | A | G | 0.49  | -0.149 | 0.023 | 0.01   | 0.016 |
| rs72930293  | 11 | 69073420  | C | T | 0.899 | 0.234  | 0.039 | 0.045  | 0.027 |
| rs11021221  | 11 | 95308854  | T | A | 0.845 | 0.213  | 0.032 | -0.024 | 0.023 |
| rs7116797   | 11 | 116707338 | A | G | 0.115 | 0.214  | 0.035 | 0.057  | 0.025 |
| rs11168244  | 12 | 48202941  | C | T | 0.798 | 0.165  | 0.03  | -0.02  | 0.022 |
| rs10747570  | 12 | 50509937  | A | G | 0.393 | 0.184  | 0.024 | -0.024 | 0.017 |
| rs17210898  | 12 | 51056511  | G | A | 0.96  | 0.351  | 0.061 | -0.066 | 0.043 |
| rs1152958   | 12 | 70325669  | G | A | 0.688 | 0.138  | 0.025 | 0.039  | 0.018 |
| rs7980687   | 12 | 123822711 | G | A | 0.793 | 0.196  | 0.029 | -0.063 | 0.02  |
| rs7989823   | 13 | 110959643 | A | C | 0.421 | -0.15  | 0.026 | 0.009  | 0.02  |
| rs3934939   | 13 | 114503990 | A | G | 0.766 | 0.163  | 0.028 | 0.004  | 0.026 |
| rs36226649  | 14 | 24835500  | T | C | 0.942 | -0.297 | 0.05  | 0.000  | 0.036 |
| rs7161323   | 14 | 53366149  | C | T | 0.394 | -0.147 | 0.026 | 0.038  | 0.018 |
| rs4923910   | 15 | 42086340  | G | C | 0.633 | -0.178 | 0.024 | -0.017 | 0.017 |
| rs35654783  | 15 | 44018656  | T | C | 0.283 | 0.166  | 0.026 | -0.022 | 0.018 |
| rs11631778  | 15 | 71606380  | G | A | 0.337 | -0.141 | 0.025 | -0.05  | 0.018 |
| rs2759308   | 15 | 81016227  | G | A | 0.523 | -0.136 | 0.024 | -0.017 | 0.017 |
| rs2034618   | 15 | 83799632  | C | T | 0.773 | 0.188  | 0.028 | 0.011  | 0.02  |
| rs12906962  | 15 | 95312071  | T | C | 0.671 | -0.16  | 0.025 | 0.008  | 0.018 |
| rs4984497   | 15 | 96635899  | T | C | 0.372 | 0.148  | 0.025 | -0.016 | 0.018 |
| rs12596053  | 16 | 4946794   | A | C | 0.439 | -0.162 | 0.024 | -0.021 | 0.017 |
| rs72799341  | 16 | 30936743  | G | A | 0.76  | -0.161 | 0.027 | 0.045  | 0.019 |
| rs12928482  | 16 | 81513871  | G | A | 0.718 | 0.147  | 0.026 | 0.018  | 0.019 |
| rs460105    | 16 | 89682006  | T | C | 0.508 | 0.178  | 0.026 | 0.005  | 0.017 |
| rs67833703  | 17 | 3888437   | C | T | 0.687 | -0.147 | 0.026 | 0.04   | 0.018 |
| rs78378222  | 17 | 7571752   | T | G | 0.986 | -0.638 | 0.111 | -0.159 | 0.08  |
| rs35565381  | 17 | 16175025  | T | C | 0.544 | -0.14  | 0.024 | -0.015 | 0.017 |
| rs4295      | 17 | 61556298  | C | G | 0.393 | 0.14   | 0.026 | 0.015  | 0.017 |
| rs167479    | 19 | 11526765  | G | T | 0.545 | 0.251  | 0.026 | 0.016  | 0.017 |
| rs4808569   | 19 | 17218970  | C | A | 0.8   | 0.162  | 0.03  | -0.017 | 0.021 |
| rs34331990  | 19 | 30321561  | T | G | 0.586 | -0.154 | 0.024 | 0.024  | 0.018 |
| rs8105753   | 19 | 31927547  | A | C | 0.615 | 0.137  | 0.024 | 0.06   | 0.019 |
| rs6060114   | 20 | 30169673  | T | C | 0.857 | 0.237  | 0.033 | -0.048 | 0.022 |
| rs6129880   | 20 | 40251829  | T | G | 0.805 | 0.174  | 0.029 | 0.012  | 0.021 |
| rs6019378   | 20 | 47309716  | C | T | 0.558 | 0.156  | 0.023 | -0.006 | 0.016 |
| rs112204826 | 21 | 44721027  | C | T | 0.965 | -0.395 | 0.071 | 0.112  | 0.062 |
| rs8139817   | 22 | 18468369  | A | C | 0.71  | -0.143 | 0.026 | -0.011 | 0.019 |

<sup>a</sup> The variants together explain 1.3% of the variation in diastolic blood pressure

**Table 9. Type 2 diabetes exposure SNVs and their association with advanced AMD.** Chr = chromosome; BP = base position (build 37); EA = effect allele; NEA = non-effect allele; EAF = effect allele frequency; SE = standard error.

| SNV        | Chr | BP        | EA | NEA | EAF   | Type 2 diabetes |       | Advanced AMD |       |
|------------|-----|-----------|----|-----|-------|-----------------|-------|--------------|-------|
|            |     |           |    |     |       | Beta            | SE    | Beta         | SE    |
| rs2296173  | 1   | 39913351  | G  | A   | 0.212 | 0.065           | 0.009 | -0.007       | 0.02  |
| rs12088739 | 1   | 51506886  | G  | A   | 0.09  | -0.088          | 0.013 | -0.016       | 0.029 |
| rs1127655  | 1   | 117530507 | C  | T   | 0.471 | 0.044           | 0.008 | -0.016       | 0.016 |
| rs2493394  | 1   | 120471224 | G  | A   | 0.107 | 0.073           | 0.011 | 0.001        | 0.027 |
| rs340874   | 1   | 214159256 | T  | C   | 0.436 | -0.063          | 0.007 | -0.009       | 0.017 |
| rs2820426  | 1   | 219660535 | A  | G   | 0.39  | -0.052          | 0.007 | 0.006        | 0.017 |
| rs348330   | 1   | 229672955 | G  | A   | 0.367 | 0.049           | 0.008 | 0.007        | 0.02  |
| rs2867125  | 2   | 622827    | T  | C   | 0.172 | -0.06           | 0.01  | -0.011       | 0.021 |
| rs780094   | 2   | 27741237  | T  | C   | 0.387 | -0.069          | 0.007 | 0.039        | 0.017 |
| rs17334919 | 2   | 43707385  | T  | C   | 0.1   | -0.14           | 0.013 | 0.066        | 0.027 |
| rs243019   | 2   | 60585806  | C  | T   | 0.456 | 0.057           | 0.007 | 0.018        | 0.016 |
| rs1009358  | 2   | 65276452  | C  | T   | 0.377 | -0.055          | 0.008 | 0.008        | 0.017 |
| rs10169613 | 2   | 111934977 | T  | C   | 0.472 | -0.043          | 0.008 | 0.053        | 0.017 |
| rs12617659 | 2   | 121309759 | T  | C   | 0.147 | -0.069          | 0.01  | 0.025        | 0.024 |
| rs7572970  | 2   | 161136656 | A  | G   | 0.278 | -0.059          | 0.009 | -0.036       | 0.018 |
| rs13389219 | 2   | 165528876 | T  | C   | 0.394 | -0.072          | 0.007 | 0.001        | 0.017 |
| rs2972144  | 2   | 227101411 | A  | G   | 0.355 | -0.091          | 0.008 | -0.011       | 0.017 |
| rs7561798  | 2   | 228973660 | G  | A   | 0.482 | 0.04            | 0.007 | 0.01         | 0.016 |
| rs1899951  | 3   | 12394840  | T  | C   | 0.123 | -0.112          | 0.011 | 0.005        | 0.025 |
| rs1496653  | 3   | 23454790  | G  | A   | 0.205 | -0.077          | 0.009 | 0.022        | 0.021 |
| rs11926707 | 3   | 46925539  | T  | C   | 0.374 | -0.046          | 0.008 | 0.036        | 0.019 |
| rs2292662  | 3   | 63897215  | T  | C   | 0.151 | -0.063          | 0.011 | 0.004        | 0.022 |
| rs6795735  | 3   | 64705365  | T  | C   | 0.411 | -0.056          | 0.007 | 0.125        | 0.017 |
| rs11708067 | 3   | 123065778 | G  | A   | 0.239 | -0.097          | 0.009 | -0.003       | 0.02  |
| rs9844972  | 3   | 150097635 | C  | G   | 0.07  | 0.096           | 0.015 | 0.003        | 0.034 |
| rs4472028  | 3   | 152053250 | T  | C   | 0.444 | 0.045           | 0.007 | -0.02        | 0.017 |
| rs11925227 | 3   | 170766618 | A  | G   | 0.183 | -0.053          | 0.01  | -0.021       | 0.025 |
| rs7651090  | 3   | 185513392 | G  | A   | 0.313 | 0.12            | 0.008 | 0.004        | 0.018 |
| rs3887925  | 3   | 186665645 | C  | T   | 0.447 | -0.047          | 0.008 | 0.009        | 0.017 |
| rs6808574  | 3   | 187740523 | T  | C   | 0.39  | -0.055          | 0.008 | -0.026       | 0.017 |
| rs1801214  | 4   | 6303022   | C  | T   | 0.4   | -0.09           | 0.007 | 0.002        | 0.017 |
| rs17086692 | 4   | 53134293  | T  | G   | 0.313 | -0.047          | 0.008 | -0.005       | 0.018 |
| rs993380   | 4   | 83584496  | A  | G   | 0.334 | 0.051           | 0.008 | 0.007        | 0.017 |
| rs7674212  | 4   | 103988899 | T  | G   | 0.409 | -0.047          | 0.008 | -0.025       | 0.017 |
| rs11098676 | 4   | 123833154 | T  | C   | 0.212 | -0.054          | 0.01  | 0.023        | 0.02  |
| rs7685296  | 4   | 153254121 | T  | C   | 0.279 | -0.051          | 0.008 | 0.019        | 0.021 |
| rs735949   | 4   | 185716232 | C  | T   | 0.141 | -0.071          | 0.011 | -0.033       | 0.025 |
| rs1061813  | 5   | 14847331  | G  | A   | 0.463 | 0.043           | 0.007 | 0.000        | 0.017 |
| rs4865796  | 5   | 53272664  | G  | A   | 0.307 | -0.053          | 0.008 | 0.01         | 0.018 |
| rs459193   | 5   | 55806751  | A  | G   | 0.255 | -0.071          | 0.008 | -0.015       | 0.019 |
| rs3900856  | 5   | 55833892  | A  | G   | 0.039 | 0.114           | 0.019 | -0.006       | 0.043 |
| rs2307111  | 5   | 75003678  | C  | T   | 0.397 | -0.041          | 0.007 | -0.038       | 0.017 |
| rs6878122  | 5   | 76427311  | G  | A   | 0.318 | 0.056           | 0.008 | 0.002        | 0.018 |
| rs7729395  | 5   | 102100576 | T  | C   | 0.051 | 0.137           | 0.016 | -0.05        | 0.043 |
| rs10077431 | 5   | 112927686 | A  | C   | 0.215 | -0.049          | 0.009 | 0.051        | 0.021 |
| rs1050226  | 6   | 7281654   | G  | A   | 0.407 | -0.049          | 0.007 | -0.002       | 0.017 |
| rs7756992  | 6   | 20679709  | G  | A   | 0.267 | 0.13            | 0.008 | 0.004        | 0.018 |
| rs2857605  | 6   | 31524851  | C  | T   | 0.211 | -0.067          | 0.009 | -0.047       | 0.021 |
| rs1063355  | 6   | 32627714  | T  | G   | 0.398 | -0.071          | 0.008 | -0.152       | 0.02  |
| rs2071479  | 6   | 32781112  | T  | C   | 0.027 | 0.147           | 0.023 | -0.069       | 0.048 |
| rs9369425  | 6   | 43810974  | G  | A   | 0.292 | 0.055           | 0.009 | 0.044        | 0.018 |

|            |    |           |   |   |       |        |       |        |       |
|------------|----|-----------|---|---|-------|--------|-------|--------|-------|
| rs72892910 | 6  | 50816887  | T | G | 0.172 | 0.065  | 0.01  | -0.083 | 0.021 |
| rs853974   | 6  | 127068983 | T | C | 0.262 | 0.06   | 0.009 | -0.029 | 0.019 |
| rs2246012  | 6  | 131898208 | C | T | 0.165 | 0.053  | 0.009 | 0.053  | 0.023 |
| rs622217   | 6  | 160766770 | C | T | 0.484 | -0.049 | 0.008 | 0.009  | 0.017 |
| rs17168486 | 7  | 14898282  | T | C | 0.174 | 0.074  | 0.009 | 0.006  | 0.022 |
| rs2191348  | 7  | 15064255  | G | T | 0.453 | -0.065 | 0.007 | 0.002  | 0.016 |
| rs849135   | 7  | 28196413  | G | A | 0.501 | 0.1    | 0.007 | 0.014  | 0.016 |
| rs2908282  | 7  | 44248828  | A | G | 0.177 | 0.055  | 0.009 | -0.043 | 0.022 |
| rs2299383  | 7  | 103418846 | T | C | 0.423 | 0.041  | 0.007 | -0.014 | 0.016 |
| rs13239186 | 7  | 117510621 | T | C | 0.302 | 0.054  | 0.009 | -0.041 | 0.018 |
| rs7786095  | 7  | 156983847 | G | A | 0.104 | -0.074 | 0.013 | 0.023  | 0.027 |
| rs10100265 | 8  | 10633159  | A | C | 0.39  | 0.049  | 0.008 | 0.031  | 0.017 |
| rs17411031 | 8  | 19852310  | G | C | 0.262 | -0.045 | 0.008 | 0.001  | 0.019 |
| rs10087241 | 8  | 30863722  | G | A | 0.405 | 0.048  | 0.008 | 0.013  | 0.017 |
| rs12681990 | 8  | 36859186  | C | T | 0.164 | 0.063  | 0.01  | -0.02  | 0.022 |
| rs516946   | 8  | 41519248  | T | C | 0.239 | -0.082 | 0.009 | 0.007  | 0.019 |
| rs7845219  | 8  | 95937502  | C | T | 0.493 | -0.042 | 0.007 | -0.031 | 0.016 |
| rs3802177  | 8  | 118185025 | A | G | 0.311 | -0.122 | 0.008 | 0.034  | 0.018 |
| rs2294120  | 8  | 146003567 | G | A | 0.456 | -0.044 | 0.008 | -0.031 | 0.019 |
| rs10974438 | 9  | 4291928   | C | A | 0.351 | 0.059  | 0.008 | 0.009  | 0.018 |
| rs1063192  | 9  | 22003367  | G | A | 0.44  | -0.063 | 0.007 | 0.07   | 0.017 |
| rs10811661 | 9  | 22134094  | C | T | 0.174 | -0.157 | 0.01  | 0.031  | 0.022 |
| rs1758632  | 9  | 34025640  | C | G | 0.377 | -0.049 | 0.008 | 0.021  | 0.017 |
| rs17791483 | 9  | 81898980  | G | A | 0.063 | -0.102 | 0.015 | 0.026  | 0.036 |
| rs2796441  | 9  | 84308948  | A | G | 0.416 | -0.072 | 0.007 | 0.004  | 0.017 |
| rs10114341 | 9  | 96919182  | C | T | 0.441 | -0.041 | 0.007 | -0.016 | 0.017 |
| rs687621   | 9  | 136137065 | G | A | 0.325 | 0.043  | 0.008 | 0.015  | 0.017 |
| rs11257655 | 10 | 12307894  | T | C | 0.207 | 0.074  | 0.009 | -0.006 | 0.02  |
| rs2616132  | 10 | 71469514  | A | G | 0.474 | 0.046  | 0.008 | 0.002  | 0.016 |
| rs2633310  | 10 | 75594050  | T | G | 0.435 | -0.044 | 0.008 | 0.011  | 0.017 |
| rs753270   | 10 | 80964975  | T | C | 0.416 | -0.053 | 0.008 | 0.037  | 0.017 |
| rs7923866  | 10 | 94482076  | T | C | 0.379 | -0.097 | 0.007 | -0.008 | 0.017 |
| rs7903146  | 10 | 114758349 | T | C | 0.292 | 0.306  | 0.008 | -0.041 | 0.018 |
| rs4918796  | 10 | 114880342 | C | T | 0.223 | 0.062  | 0.009 | -0.007 | 0.024 |
| rs2421016  | 10 | 124167512 | T | C | 0.474 | -0.046 | 0.007 | 0.51   | 0.017 |
| rs2237892  | 11 | 2839751   | T | C | 0.062 | -0.096 | 0.016 | 0.029  | 0.034 |
| rs5215     | 11 | 17408630  | C | T | 0.36  | 0.068  | 0.007 | 0.028  | 0.017 |
| rs7929543  | 11 | 49351026  | C | A | 0.083 | 0.083  | 0.014 | -0.054 | 0.031 |
| rs1552224  | 11 | 72433098  | C | A | 0.154 | -0.103 | 0.01  | -0.004 | 0.023 |
| rs10830963 | 11 | 92708710  | G | C | 0.276 | 0.091  | 0.008 | 0.018  | 0.018 |
| rs7931302  | 11 | 128236058 | C | A | 0.277 | 0.046  | 0.008 | 0.008  | 0.019 |
| rs67232546 | 11 | 128398938 | T | C | 0.209 | 0.06   | 0.01  | -0.021 | 0.021 |
| rs11048456 | 12 | 26463082  | C | T | 0.244 | 0.049  | 0.008 | 0.04   | 0.019 |
| rs10842994 | 12 | 27965150  | T | C | 0.197 | -0.076 | 0.009 | -0.028 | 0.021 |
| rs2261181  | 12 | 66212318  | T | C | 0.096 | 0.099  | 0.012 | -0.03  | 0.027 |
| rs1480474  | 12 | 66326943  | G | A | 0.416 | 0.041  | 0.007 | 0.016  | 0.017 |
| rs7138300  | 12 | 71439589  | C | T | 0.443 | 0.044  | 0.007 | 0.031  | 0.016 |
| rs11107116 | 12 | 93978504  | T | G | 0.22  | 0.047  | 0.009 | -0.023 | 0.02  |
| rs61953351 | 12 | 121456616 | T | G | 0.25  | -0.07  | 0.009 | 0.017  | 0.019 |
| rs940904   | 12 | 123491572 | G | A | 0.257 | -0.05  | 0.008 | 0.028  | 0.018 |
| rs825476   | 12 | 124568456 | C | T | 0.419 | -0.052 | 0.007 | -0.024 | 0.017 |
| rs576674   | 13 | 33554302  | G | A | 0.167 | 0.065  | 0.01  | -0.043 | 0.022 |
| rs963740   | 13 | 51096095  | T | A | 0.294 | -0.048 | 0.009 | 0.029  | 0.018 |
| rs1359790  | 13 | 80717156  | A | G | 0.287 | -0.08  | 0.008 | 0.038  | 0.018 |
| rs7144011  | 14 | 79940383  | T | G | 0.221 | 0.048  | 0.009 | -0.025 | 0.02  |
| rs4502156  | 15 | 62383155  | C | T | 0.436 | -0.041 | 0.007 | 0.002  | 0.017 |
| rs982077   | 15 | 63823301  | A | G | 0.434 | 0.045  | 0.007 | -0.013 | 0.017 |
| rs7177055  | 15 | 77832762  | G | A | 0.282 | -0.065 | 0.008 | 0.000  | 0.018 |

|            |    |          |   |   |       |        |       |        |       |
|------------|----|----------|---|---|-------|--------|-------|--------|-------|
| rs4932143  | 15 | 90372067 | G | C | 0.279 | 0.057  | 0.009 | 0.035  | 0.018 |
| rs12910825 | 15 | 91511260 | G | A | 0.36  | 0.052  | 0.007 | -0.046 | 0.018 |
| rs9940149  | 16 | 300641   | A | G | 0.179 | -0.058 | 0.01  | -0.005 | 0.022 |
| rs7185735  | 16 | 53822651 | G | A | 0.397 | 0.106  | 0.007 | -0.028 | 0.017 |
| rs244415   | 16 | 69666683 | A | G | 0.413 | -0.047 | 0.008 | 0.005  | 0.017 |
| rs77258096 | 16 | 75243772 | A | C | 0.101 | -0.117 | 0.013 | -0.162 | 0.028 |
| rs2925979  | 16 | 81534790 | T | C | 0.299 | 0.053  | 0.008 | 0.03   | 0.018 |
| rs8068804  | 17 | 3985864  | A | G | 0.325 | 0.059  | 0.008 | -0.039 | 0.018 |
| rs12945601 | 17 | 17653411 | T | C | 0.386 | 0.048  | 0.008 | -0.019 | 0.017 |
| rs11651755 | 17 | 36099840 | C | T | 0.485 | 0.074  | 0.008 | -0.006 | 0.016 |
| rs17405722 | 17 | 40542501 | A | G | 0.074 | 0.087  | 0.015 | -0.028 | 0.033 |
| rs9911983  | 17 | 45885756 | C | T | 0.433 | -0.04  | 0.007 | -0.003 | 0.017 |
| rs9894220  | 17 | 46989154 | G | A | 0.434 | -0.059 | 0.008 | -0.027 | 0.016 |
| rs302864   | 17 | 56757584 | A | G | 0.087 | 0.071  | 0.013 | 0.009  | 0.031 |
| rs17631783 | 17 | 61687600 | T | C | 0.263 | -0.049 | 0.009 | -0.01  | 0.019 |
| rs7240767  | 18 | 7070642  | C | T | 0.384 | 0.045  | 0.008 | -0.003 | 0.017 |
| rs12970134 | 18 | 57884750 | A | G | 0.265 | 0.056  | 0.008 | -0.024 | 0.019 |
| rs10401969 | 19 | 19407718 | C | T | 0.077 | 0.092  | 0.013 | 0.012  | 0.03  |
| rs8108269  | 19 | 46158513 | G | T | 0.281 | 0.064  | 0.008 | -0.028 | 0.018 |
| rs6515236  | 20 | 22435749 | C | A | 0.249 | -0.05  | 0.009 | 0.015  | 0.019 |
| rs6059662  | 20 | 32675727 | A | G | 0.337 | -0.045 | 0.008 | 0.014  | 0.018 |
| rs4810426  | 20 | 43001721 | T | C | 0.097 | 0.073  | 0.013 | -0.06  | 0.028 |
| rs6066138  | 20 | 45594711 | A | G | 0.278 | -0.049 | 0.008 | 0.019  | 0.018 |
| rs16988333 | 22 | 30552813 | G | A | 0.09  | -0.075 | 0.013 | 0.021  | 0.03  |
| rs4823182  | 22 | 44377442 | G | A | 0.336 | 0.048  | 0.008 | -0.006 | 0.017 |

**Table 10. HbA1c exposure SNVs and their association with advanced AMD.**<sup>a</sup> Chr = chromosome; BP = base position (build 37); EA = effect allele; NEA = non-effect allele; EAF = effect allele frequency; SE = standard error.

| SNV        | Chr | BP        | EA | NEA | EAF   | HbA1c |       | Advanced AMD |       |
|------------|-----|-----------|----|-----|-------|-------|-------|--------------|-------|
|            |     |           |    |     |       | Beta  | SE    | Beta         | SE    |
| rs267738   | 1   | 150940625 | T  | G   | 0.77  | 0.011 | 0.002 | 0.002        | 0.02  |
| rs857691   | 1   | 158626378 | T  | C   | 0.272 | 0.019 | 0.002 | -0.032       | 0.019 |
| rs17509001 | 2   | 24021231  | C  | T   | 0.158 | 0.018 | 0.002 | 0.014        | 0.023 |
| rs12621844 | 2   | 48414735  | T  | C   | 0.6   | 0.01  | 0.002 | -0.028       | 0.017 |
| rs560887   | 2   | 169763148 | C  | T   | 0.684 | 0.028 | 0.002 | -0.014       | 0.018 |
| rs7616006  | 3   | 12267648  | A  | G   | 0.574 | 0.01  | 0.002 | 0.021        | 0.017 |
| rs9818758  | 3   | 49382925  | A  | G   | 0.203 | 0.012 | 0.002 | -0.014       | 0.021 |
| rs11708067 | 3   | 123065778 | A  | G   | 0.754 | 0.013 | 0.002 | 0.003        | 0.02  |
| rs8192675  | 3   | 170724883 | T  | C   | 0.691 | 0.011 | 0.002 | 0.023        | 0.018 |
| rs13134327 | 4   | 144659795 | A  | G   | 0.334 | 0.013 | 0.002 | 0.038        | 0.018 |
| rs7756992  | 6   | 20679709  | G  | A   | 0.286 | 0.012 | 0.002 | 0.004        | 0.018 |
| rs1800562  | 6   | 26093141  | G  | A   | 0.928 | 0.04  | 0.004 | 0.063        | 0.036 |
| rs198846   | 6   | 26107463  | G  | A   | 0.829 | 0.022 | 0.002 | 0.023        | 0.023 |
| rs11964178 | 6   | 109562035 | A  | G   | 0.567 | 0.01  | 0.002 | -0.026       | 0.017 |
| rs592423   | 6   | 139840693 | A  | C   | 0.457 | 0.009 | 0.002 | -0.007       | 0.016 |
| rs4607517  | 7   | 44235668  | A  | G   | 0.202 | 0.031 | 0.002 | -0.044       | 0.022 |
| rs6474359  | 8   | 41549194  | T  | C   | 0.953 | 0.044 | 0.005 | -0.071       | 0.046 |
| rs4737009  | 8   | 41630405  | A  | G   | 0.253 | 0.021 | 0.002 | -0.004       | 0.019 |
| rs6980507  | 8   | 42383084  | A  | G   | 0.401 | 0.01  | 0.002 | 0.022        | 0.017 |
| rs11558471 | 8   | 118185733 | A  | G   | 0.675 | 0.015 | 0.002 | -0.033       | 0.018 |
| rs2383208  | 9   | 22132076  | A  | G   | 0.799 | 0.014 | 0.002 | -0.03        | 0.022 |
| rs7040409  | 9   | 91503236  | C  | G   | 0.895 | 0.028 | 0.004 | -0.033       | 0.034 |
| rs579459   | 9   | 136154168 | C  | T   | 0.239 | 0.011 | 0.002 | 0.023        | 0.019 |
| rs4745982  | 10  | 71089843  | T  | G   | 0.873 | 0.095 | 0.006 | -0.057       | 0.037 |
| rs17747324 | 10  | 114752503 | C  | T   | 0.249 | 0.015 | 0.002 | -0.063       | 0.021 |
| rs3782123  | 11  | 205198    | C  | A   | 0.321 | 0.013 | 0.002 | 0.001        | 0.018 |
| rs11603334 | 11  | 72432985  | G  | A   | 0.815 | 0.012 | 0.002 | 0.003        | 0.023 |
| rs10830963 | 11  | 92708710  | G  | C   | 0.294 | 0.02  | 0.002 | 0.018        | 0.018 |
| rs10774625 | 12  | 111910219 | G  | A   | 0.506 | 0.009 | 0.002 | -0.062       | 0.016 |
| rs282587   | 13  | 113351662 | G  | A   | 0.151 | 0.019 | 0.003 | 0.012        | 0.025 |
| rs9604573  | 13  | 114542858 | T  | C   | 0.274 | 0.01  | 0.002 | -0.036       | 0.02  |
| rs11248914 | 16  | 293562    | T  | C   | 0.647 | 0.014 | 0.002 | -0.017       | 0.017 |
| rs837763   | 16  | 88853729  | T  | C   | 0.555 | 0.017 | 0.002 | 0.017        | 0.016 |
| rs9914988  | 17  | 27183104  | A  | G   | 0.788 | 0.013 | 0.002 | -0.008       | 0.02  |
| rs1046896  | 17  | 80685533  | T  | C   | 0.316 | 0.028 | 0.002 | 0.003        | 0.017 |
| rs17533903 | 19  | 17256523  | A  | G   | 0.243 | 0.015 | 0.002 | 0.033        | 0.022 |
| rs4820268  | 22  | 37469591  | G  | A   | 0.461 | 0.016 | 0.002 | 0.011        | 0.016 |

<sup>a</sup> The variants together explain 1.6% of the variation in HbA1c



**Table 11. Fasting glucose exposure SNVs and their association with advanced AMD.**<sup>a</sup> Chr = chromosome; BP = base position (build 37); EA = effect allele; NEA = non-effect allele; EAF = effect allele frequency; SE = standard error.

| SNV        | Chr | BP        | EA | NEA | EAF   | Fasting glucose |       | Advanced AMD |       |
|------------|-----|-----------|----|-----|-------|-----------------|-------|--------------|-------|
|            |     |           |    |     |       | Beta            | SE    | Beta         | SE    |
| rs340874   | 1   | 214159256 | C  | T   | 0.438 | 0.013           | 0.002 | 0.009        | 0.017 |
| rs780094   | 2   | 27741237  | C  | T   | 0.394 | 0.027           | 0.002 | -0.039       | 0.017 |
| rs560887   | 2   | 169763148 | C  | T   | 0.326 | 0.071           | 0.003 | -0.014       | 0.018 |
| rs11715915 | 3   | 49455330  | C  | T   | 0.274 | 0.012           | 0.002 | 0.017        | 0.018 |
| rs11708067 | 3   | 123065778 | A  | G   | 0.226 | 0.023           | 0.003 | 0.003        | 0.02  |
| rs1280     | 3   | 170713290 | T  | C   | 0.137 | 0.026           | 0.003 | 0.012        | 0.024 |
| rs7651090  | 3   | 185513392 | A  | G   | 0.296 | -0.013          | 0.002 | -0.004       | 0.018 |
| rs7708285  | 5   | 76425867  | G  | A   | 0.261 | 0.011           | 0.003 | 0.005        | 0.018 |
| rs4869272  | 5   | 95539448  | C  | T   | 0.323 | -0.018          | 0.002 | -0.002       | 0.018 |
| rs17762454 | 6   | 7213200   | C  | T   | 0.217 | -0.012          | 0.002 | 0.004        | 0.019 |
| rs9368222  | 6   | 20686996  | C  | A   | 0.281 | -0.014          | 0.002 | -0.003       | 0.018 |
| rs2191349  | 7   | 15064309  | G  | T   | 0.467 | -0.029          | 0.002 | 0.001        | 0.016 |
| rs730497   | 7   | 44223721  | G  | A   | 0.195 | -0.057          | 0.003 | 0.045        | 0.022 |
| rs6943153  | 7   | 50791579  | C  | T   | 0.279 | -0.015          | 0.002 | 0            | 0.018 |
| rs983309   | 8   | 9177732   | G  | T   | 0.097 | -0.026          | 0.003 | 0.002        | 0.026 |
| rs11558471 | 8   | 118185733 | A  | G   | 0.252 | 0.029           | 0.002 | -0.033       | 0.018 |
| rs10814916 | 9   | 4293150   | C  | A   | 0.434 | 0.016           | 0.002 | 0.016        | 0.017 |
| rs10811661 | 9   | 22134094  | T  | C   | 0.199 | 0.024           | 0.003 | -0.031       | 0.022 |
| rs16913693 | 9   | 111680359 | T  | G   | 0.017 | 0.043           | 0.007 | -0.014       | 0.053 |
| rs3829109  | 9   | 139256766 | G  | A   | 0.345 | 0.017           | 0.003 | 0.004        | 0.018 |
| rs11195502 | 10  | 113039667 | C  | T   | 0.075 | 0.032           | 0.004 | 0.055        | 0.03  |
| rs7903146  | 10  | 114758349 | C  | T   | 0.279 | -0.022          | 0.002 | 0.041        | 0.018 |
| rs11607883 | 11  | 45839709  | G  | A   | 0.469 | 0.021           | 0.002 | 0.003        | 0.017 |
| rs11039182 | 11  | 47346723  | T  | C   | 0.308 | 0.023           | 0.002 | -0.019       | 0.018 |
| rs174576   | 11  | 61603510  | C  | A   | 0.345 | 0.02            | 0.002 | 0.057        | 0.017 |
| rs11603334 | 11  | 72432985  | G  | A   | 0.129 | 0.019           | 0.003 | 0.003        | 0.023 |
| rs2657879  | 12  | 56865338  | A  | G   | 0.186 | -0.012          | 0.003 | -0.039       | 0.021 |
| rs10747083 | 12  | 133041618 | A  | G   | 0.25  | 0.013           | 0.002 | -0.004       | 0.017 |
| rs11619319 | 13  | 28487599  | A  | G   | 0.212 | -0.02           | 0.002 | -0.009       | 0.02  |
| rs576674   | 13  | 33554302  | G  | A   | 0.129 | 0.017           | 0.003 | -0.043       | 0.022 |
| rs3783347  | 14  | 100839261 | G  | T   | 0.219 | 0.017           | 0.003 | 0.018        | 0.02  |
| rs4502156  | 15  | 62383155  | T  | C   | 0.42  | 0.022           | 0.002 | -0.002       | 0.017 |
| rs6113722  | 20  | 22557099  | G  | A   | 0.04  | 0.035           | 0.005 | -0.06        | 0.039 |
| rs6072275  | 20  | 39743905  | G  | A   | 0.142 | -0.016          | 0.003 | -0.053       | 0.023 |

<sup>a</sup> The variants together explain 7% of the variation in fasting glucose

**Table 12. Fasting insulin exposure SNVs and their association with advanced AMD.** <sup>a</sup> Chr = chromosome; BP = base position (build 37); EA = effect allele; NEA = non-effect allele; EAF = effect allele frequency; SE = standard error.

| SNV        | Chr | BP        | EA | NEA | EAF   | Fasting insulin |       | Advanced AMD |       |
|------------|-----|-----------|----|-----|-------|-----------------|-------|--------------|-------|
|            |     |           |    |     |       | Beta            | SE    | Beta         | SE    |
| rs2820436  | 1   | 219640680 | C  | A   | 0.322 | 0.015           | 0.003 | -0.002       | 0.018 |
| rs1530559  | 2   | 135755629 | A  | G   | 0.403 | 0.014           | 0.003 | 0.003        | 0.019 |
| rs10195252 | 2   | 165513091 | C  | T   | 0.442 | -0.016          | 0.003 | -0.002       | 0.017 |
| rs2972143  | 2   | 227116365 | G  | A   | 0.371 | 0.014           | 0.003 | 0.013        | 0.017 |
| rs17036328 | 3   | 12390484  | T  | C   | 0.097 | 0.015           | 0.004 | -0.003       | 0.025 |
| rs3822072  | 4   | 89741269  | G  | A   | 0.455 | -0.009          | 0.002 | 0.036        | 0.016 |
| rs9884482  | 4   | 106081636 | T  | C   | 0.35  | -0.016          | 0.002 | 0.02         | 0.017 |
| rs4865796  | 5   | 53272664  | A  | G   | 0.292 | 0.015           | 0.003 | -0.01        | 0.018 |
| rs459193   | 5   | 55806751  | G  | A   | 0.217 | 0.014           | 0.003 | 0.015        | 0.019 |
| rs6912327  | 6   | 34764922  | C  | T   | 0.243 | -0.016          | 0.003 | 0.04         | 0.02  |
| rs2745353  | 6   | 127452935 | T  | C   | 0.45  | 0.014           | 0.003 | -0.05        | 0.016 |
| rs1167800  | 7   | 75176196  | A  | G   | 0.451 | 0.016           | 0.003 | 0.02         | 0.017 |
| rs1421085  | 16  | 53800954  | T  | C   | 0.46  | -0.02           | 0.003 | 0.03         | 0.017 |
| rs731839   | 19  | 33899065  | A  | G   | 0.341 | -0.014          | 0.003 | 0.028        | 0.017 |

<sup>a</sup> The variants together explain 1% of the variation in fasting insulin

**eTable 13. Mendelian randomization analysis of modifiable risk factors for advanced AMD, geographic atrophy, and neovascular AMD.**

| Risk Factor               | Method                        | Advanced AMD      |         | Geographic atrophy    |         | Neovascular AMD   |         |
|---------------------------|-------------------------------|-------------------|---------|-----------------------|---------|-------------------|---------|
|                           |                               | OR (95%)          | P value | OR (95%)              | P value | OR (95%)          | P value |
| Smoking initiation        | IVW                           | 1.26 (1.13, 1.40) | < 0.001 | 1.24 (1.03, 1.49)     | 0.02    | 1.26 (1.11, 1.43) | < 0.001 |
|                           | Multivariable MR*             | 1.19 (1.05, 1.36) | 0.007   | 1.19 (0.96, 1.48)     | 0.12    | 1.18 (1.02, 1.37) | 0.02    |
|                           | Weighted Median               | 1.20 (1.02, 1.40) | 0.03    | 1.31 (1.00, 1.72)     | 0.05    | 1.29 (1.08, 1.54) | 0.005   |
|                           | MR Egger                      | 1.40 (0.87, 2.25) | 0.16    | 0.84 (0.38, 1.84)     | 0.66    | 1.70 (1.00, 2.88) | 0.05    |
|                           | MR Egger intercept            | NA                | 0.65    | NA                    | 0.31    | NA                | 0.26    |
|                           | MR-PRESSO global test         | NA                | 0.10    | NA                    | 0.19    | NA                | 0.16    |
|                           | MR -PRESSO number of outliers | 0                 | NA      | 0                     | NA      | 0                 | NA      |
|                           | MR-PRESSO outlier test        | NA                | NA      | NA                    | NA      | NA                | NA      |
| Smoking cessation         | IVW                           | 0.66 (0.50, 0.87) | 0.003   | 0.84 (0.54, 1.30)     | 0.43    | 0.67 (0.49, 0.92) | 0.01    |
|                           | Multivariable MR*             | 0.71 (0.57, 0.88) | 0.002   | 0.83 (0.57, 1.20)     | 0.32    | 0.72 (0.57, 0.93) | 0.01    |
|                           | Weighted Median               | 0.83 (0.56, 1.21) | 0.32    | 0.94 (0.51, 1.73)     | 0.84    | 0.87 (0.57, 1.33) | 0.51    |
|                           | MR Egger                      | 0.43 (0.21, 0.87) | 0.02    | 0.45 (0.14, 1.41)     | 0.17    | 0.42 (0.18, 0.96) | 0.04    |
|                           | MR Egger intercept            | NA                | 0.20    | NA                    | 0.25    | NA                | 0.23    |
|                           | MR-PRESSO global test         | NA                | 0.34    | NA                    | 0.70    | NA                | 0.29    |
|                           | MR -PRESSO number of outliers | 0                 | NA      | 0                     | NA      | 0                 | NA      |
|                           | MR-PRESSO outlier test        | NA                | NA      | NA                    | NA      | NA                | NA      |
| Lifetime smoking index    | IVW                           | 1.32 (1.09, 1.59) | 0.004   | 1.25 (0.92, 1.69)     | 0.15    | 1.41 (1.14, 1.74) | 0.001   |
|                           | Multivariable MR*             | 1.48 (1.14, 1.94) | 0.004   | 1.51 (0.96, 2.37)     | 0.08    | 1.62 (1.19, 2.19) | 0.002   |
|                           | Weighted Median               | 1.42 (1.11, 1.81) | 0.005   | 1.21 (0.80, 1.81)     | 0.36    | 1.42 (1.08, 1.88) | 0.01    |
|                           | MR Egger                      | 1.87 (0.88, 3.99) | 0.11    | 2.04 (0.60, 6.89)     | 0.25    | 1.75 (0.75, 4.07) | 0.19    |
|                           | MR Egger intercept            | NA                | 0.35    | NA                    | 0.41    | NA                | 0.60    |
|                           | MR-PRESSO global test         | NA                | 0.002   | NA                    | 0.03    | NA                | 0.006   |
|                           | MR -PRESSO number of outliers | 0                 | NA      | 1                     | NA      | 0                 | NA      |
|                           | MR-PRESSO outlier test        | NA (NA, NA)       | NA      | 1.18 (0.89, 1.57)     | 0.24    | NA (NA, NA)       | NA      |
| Age of smoking initiation | IVW                           | 0.89 (0.39, 2.01) | 0.77    | 1.18 (0.30, 4.68)     | 0.82    | 0.88 (0.35, 2.22) | 0.78    |
|                           | Multivariable MR*             | 0.94 (0.41, 2.11) | 0.87    | 1.23 (0.31, 4.86)     | 0.77    | 0.92 (0.36, 2.32) | 0.86    |
|                           | Weighted Median               | 0.77 (0.28, 2.17) | 0.62    | 0.94 (0.17, 5.20)     | 0.95    | 0.72 (0.22, 2.35) | 0.59    |
|                           | MR Egger                      | 0.16 (0.00, 8.14) | 0.36    | 10.74 (0.02, 7479.70) | 0.48    | 0.11 (0.00, 9.66) | 0.34    |
|                           | MR Egger intercept            | NA                | 0.38    | NA                    | 0.50    | NA                | 0.35    |
|                           | MR-PRESSO global test         | NA                | 0.75    | NA                    | 0.91    | NA                | 0.71    |
|                           | MR -PRESSO number of outliers | 0                 | NA      | 0                     | NA      | 0                 | NA      |
|                           | MR-PRESSO outlier test        | NA                | NA      | NA                    | NA      | NA                | NA      |
| MR-PRESSO distortion test | NA                            | NA                | NA      | NA                    | NA      | NA                |         |

|                                  |                               |                   |         |                    |         |                   |        |
|----------------------------------|-------------------------------|-------------------|---------|--------------------|---------|-------------------|--------|
| <b>Alcoholic drinks per week</b> | IVW                           | 1.57 (1.03, 2.40) | 0.04    | 2.70 (1.48, 4.94)  | 0.001   | 1.49 (0.95, 2.34) | 0.09   |
|                                  | Multivariable MR**            | 1.70 (1.27, 2.27) | < 0.001 | 2.61 (1.58, 4.32)  | < 0.001 | 1.60 (1.15, 2.22) | 0.005  |
|                                  | Weighted Median               | 2.04 (1.23, 3.39) | 0.006   | 2.43 (0.99, 5.96)  | 0.05    | 2.11 (1.19, 3.74) | 0.01   |
|                                  | MR Egger                      | 2.01 (0.98, 4.10) | 0.06    | 2.25 (0.79, 6.36)  | 0.13    | 2.06 (0.97, 4.39) | 0.06   |
|                                  | MR Egger intercept            | NA                | 0.40    | NA                 | 0.67    | NA                | 0.29   |
|                                  | MR-PRESSO global test         | NA                | <0.001  | NA                 | 0.02    | NA                | <0.001 |
|                                  | MR -PRESSO number of outliers | 3                 | NA      | 1                  | NA      | 2                 | NA     |
|                                  | MR-PRESSO outlier test        | 1.47 (1.02, 2.10) | 0.04    | 2.50 (1.42, 4.42)  | 0.002   | 1.48 (0.99, 2.22) | 0.06   |
| MR-PRESSO distortion test        | NA                            | 0.67              | NA      | 0.76               | NA      | 0.98              |        |
| <b>Body mass index</b>           | IVW                           | 1.03 (0.90, 1.18) | 0.70    | 1.03 (0.83, 1.29)  | 0.77    | 1.02 (0.87, 1.19) | 0.80   |
|                                  | Weighted Median               | 0.98 (0.80, 1.20) | 0.82    | 1.05 (0.71, 1.54)  | 0.81    | 0.92 (0.73, 1.16) | 0.51   |
|                                  | MR Egger                      | 0.76 (0.55, 1.06) | 0.11    | 1.03 (0.60, 1.75)  | 0.92    | 0.68 (0.47, 0.99) | 0.04   |
|                                  | MR Egger intercept            | NA                | 0.05    | NA                 | 0.98    | NA                | 0.02   |
|                                  | MR-PRESSO global test         | NA                | <0.001  | NA                 | 0.03    | NA                | 0.001  |
|                                  | MR -PRESSO number of outliers | 1                 | NA      | 1                  | NA      | 1                 | NA     |
|                                  | MR-PRESSO outlier test        | 1.06 (0.93, 1.21) | 0.41    | 1.01 (0.82, 1.25)  | 0.91    | 1.06 (0.91, 1.23) | 0.45   |
|                                  | MR-PRESSO distortion test     | NA                | 0.90    | NA                 | 0.05    | NA                | 0.95   |
| <b>Systolic blood pressure</b>   | IVW                           | 1.01 (0.85, 1.21) | 0.91    | 1.06 (0.82, 1.38)  | 0.65    | 0.97 (0.80, 1.18) | 0.76   |
|                                  | Weighted Median               | 1.09 (0.88, 1.35) | 0.44    | 1.26 (0.88, 1.79)  | 0.21    | 0.90 (0.70, 1.15) | 0.41   |
|                                  | MR Egger                      | 1.66 (0.65, 4.20) | 0.29    | 3.11 (0.79, 12.27) | 0.10    | 1.16 (0.41, 3.30) | 0.78   |
|                                  | MR Egger intercept            | NA                | 0.29    | NA                 | 0.12    | NA                | 0.73   |
|                                  | MR-PRESSO global test         | NA                | <0.001  | NA                 | 0.10    | NA                | 0.003  |
|                                  | MR -PRESSO number of outliers | 0x                | NA      | 0                  | NA      | 0                 | NA     |
|                                  | MR-PRESSO outlier test        | NA                | NA      | NA                 | NA      | NA                | NA     |
|                                  | MR-PRESSO distortion test     | NA                | NA      | NA                 | NA      | NA                | NA     |
| <b>Diastolic blood pressure</b>  | IVW                           | 0.82 (0.58, 1.16) | 0.27    | 0.93 (0.59, 1.48)  | 0.77    | 0.82 (0.57, 1.19) | 0.29   |
|                                  | Weighted Median               | 1.13 (0.78, 1.63) | 0.51    | 0.89 (0.51, 1.57)  | 0.69    | 0.98 (0.66, 1.47) | 0.94   |
|                                  | MR Egger                      | 0.70 (0.15, 3.32) | 0.66    | 0.29 (0.04, 2.15)  | 0.22    | 0.93 (0.18, 4.79) | 0.93   |
|                                  | MR Egger intercept            | NA                | 0.84    | NA                 | 0.24    | NA                | 0.88   |
|                                  | MR-PRESSO global test         | NA                | <0.001  | NA                 | <0.001  | NA                | <0.001 |
|                                  | MR -PRESSO number of outliers | 3                 | NA      | 1                  | NA      | 2                 | NA     |
|                                  | MR-PRESSO outlier test        | 0.90 (0.66, 1.22) | 0.51    | 0.99 (0.63, 1.56)  | 0.96    | 0.87 (0.62, 1.21) | 0.41   |
|                                  | MR-PRESSO distortion test     | NA                | 0.26    | NA                 | 0.04    | NA                | 0.57   |
| <b>Type 2 diabetes</b>           | IVW                           | 0.89 (0.77, 1.02) | 0.10    | 0.94 (0.82, 1.07)  | 0.35    | 0.88 (0.75, 1.02) | 0.09   |
|                                  | Weighted Median               | 0.89 (0.81, 0.97) | 0.007   | 0.86 (0.75, 0.99)  | 0.03    | 0.88 (0.80, 0.98) | 0.02   |
|                                  | MR Egger                      | 0.98 (0.71, 1.36) | 0.92    | 0.86 (0.64, 1.16)  | 0.33    | 1.01 (0.71, 1.43) | 0.96   |
|                                  | MR Egger intercept            | NA                | 0.50    | NA                 | 0.53    | NA                | 0.38   |
|                                  | MR-PRESSO global test         | NA                | <0.001  | NA                 | <0.001  | NA                | <0.001 |
|                                  | MR -PRESSO number of outliers | 6                 | NA      | 2                  | NA      | 6                 | NA     |
|                                  | MR-PRESSO outlier test        | 0.93 (0.88, 0.98) | 0.01    | 0.96 (0.88, 1.05)  | 0.39    | 0.91 (0.85, 0.96) | 0.002  |

|                        |                               |                     |       |                            |      |                     |      |
|------------------------|-------------------------------|---------------------|-------|----------------------------|------|---------------------|------|
|                        | MR-PRESSO distortion test     | NA                  | 0.04  | NA                         | 0.39 | NA                  | 0.13 |
| <b>HbA1c</b>           | IVW                           | 0.72 (0.45, 1.16)   | 0.18  | 0.74 (0.36, 1.50)          | 0.40 | 0.75 (0.48, 1.15)   | 0.19 |
|                        | Weighted Median               | 0.59 (0.34, 1.03)   | 0.07  | 0.57 (0.23, 1.42)          | 0.22 | 0.68 (0.37, 1.27)   | 0.23 |
|                        | MR Egger                      | 0.72 (0.28, 1.84)   | 0.49  | 0.48 (0.12, 1.95)          | 0.31 | 0.74 (0.31, 1.75)   | 0.49 |
|                        | MR Egger intercept            | NA                  | 0.99  | NA                         | 0.49 | NA                  | 0.98 |
|                        | MR-PRESSO global test         | NA                  | 0.001 | NA                         | 0.04 | NA                  | 0.16 |
|                        | MR -PRESSO number of outliers | 1                   | NA    | 0                          | NA   | 0                   | NA   |
|                        | MR-PRESSO outlier test        | 0.77 (0.50, 1.18)   | 0.24  | NA                         | NA   | NA                  | NA   |
|                        | MR-PRESSO distortion test     | NA                  | 0.71  | NA                         | NA   | NA                  | NA   |
| <b>Fasting glucose</b> | IVW                           | 0.82 (0.59, 1.14)   | 0.24  | 0.83 (0.53, 1.31)          | 0.43 | 0.83 (0.57, 1.20)   | 0.32 |
|                        | Weighted Median               | 0.83 (0.55, 1.26)   | 0.38  | 1.07 (0.54, 2.10)          | 0.85 | 0.73 (0.46, 1.15)   | 0.17 |
|                        | MR Egger                      | 0.48 (0.25, 0.91)   | 0.02  | 0.54 (0.22, 1.36)          | 0.19 | 0.44 (0.21, 0.90)   | 0.03 |
|                        | MR Egger intercept            | NA                  | 0.06  | NA                         | 0.29 | NA                  | 0.05 |
|                        | MR-PRESSO global test         | NA                  | 0.03  | NA                         | 0.43 | NA                  | 0.03 |
|                        | MR -PRESSO number of outliers | 1                   | NA    | 0                          | NA   | 1                   | NA   |
|                        | MR-PRESSO outlier test        | 0.76 (0.57, 1.03)   | 0.09  | NA                         | NA   | 0.75 (0.55, 1.01)   | 0.07 |
|                        | MR-PRESSO distortion test     | NA                  | 0.70  | NA                         | NA   | NA                  | 0.57 |
| <b>Fasting insulin</b> | IVW                           | 0.45 (0.20, 1.01)   | 0.05  | 0.38 (0.13, 1.11)          | 0.08 | 0.48 (0.18, 1.28)   | 0.14 |
|                        | Weighted Median               | 0.52 (0.20, 1.32)   | 0.17  | 0.55 (0.13, 2.33)          | 0.42 | 0.45 (0.15, 1.38)   | 0.16 |
|                        | MR Egger                      | 2.65 (0.01, 498.16) | 0.72  | 1332.90 (1.63, 1092910.98) | 0.04 | 0.36 (0.00, 266.10) | 0.76 |
|                        | MR Egger intercept            | NA                  | 0.50  | NA                         | 0.02 | NA                  | 0.93 |
|                        | MR-PRESSO global test         | NA                  | 0.08  | NA                         | 0.02 | NA                  | 0.40 |
|                        | MR -PRESSO number of outliers | 0                   | NA    | 0                          | NA   | 0                   | NA   |
|                        | MR-PRESSO outlier test        | NA                  | NA    | NA                         | NA   | NA                  | NA   |
|                        | MR-PRESSO distortion test     | NA                  | NA    | NA                         | NA   | NA                  | NA   |

\* adjusted for alcohol intake

\*\*adjusted for smoking behavior

**Figure 1. Scatter plot of SNV-smoking initiation and SNV-AMD association estimates for the smoking initiation instrument.**

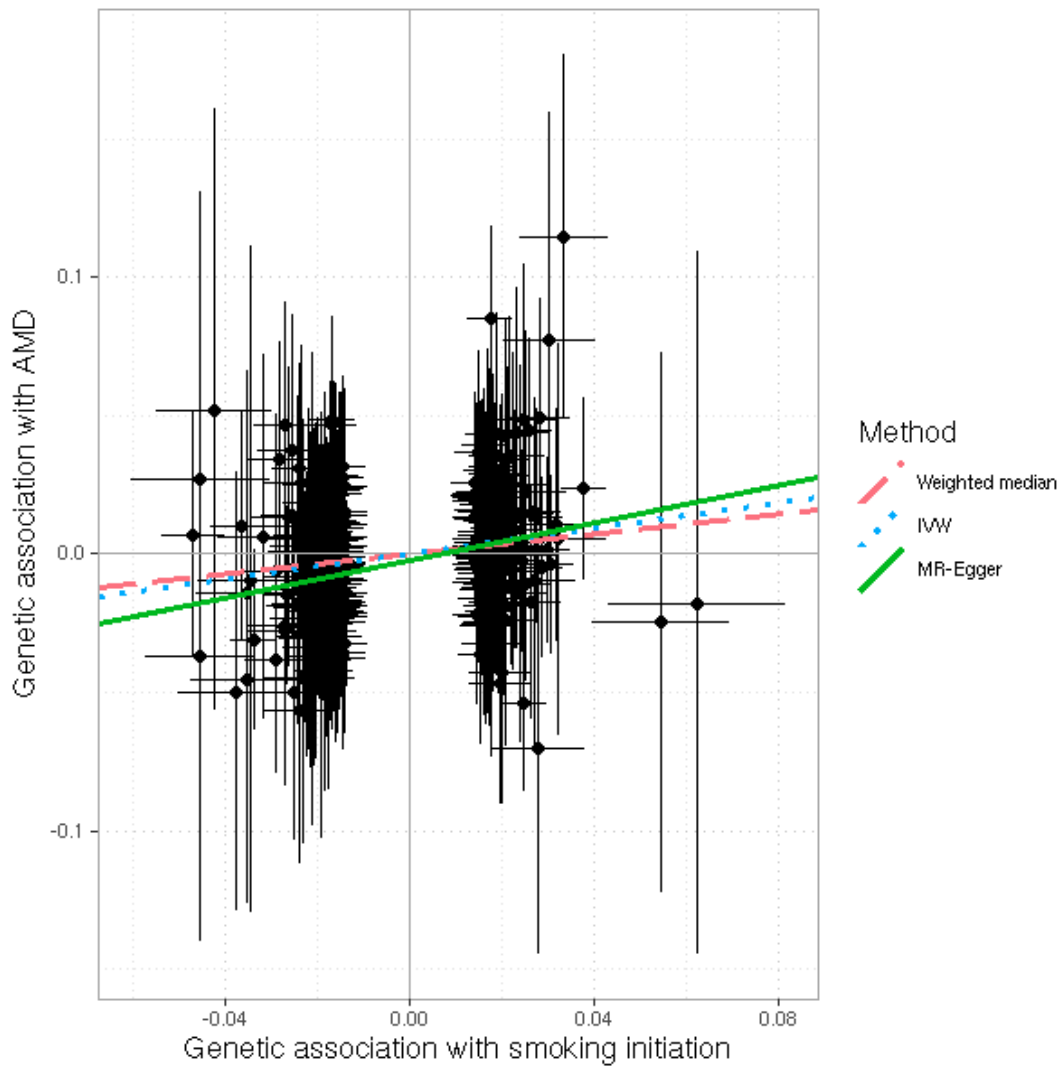

**Figure 2. Scatter plot of SNV-smoking cessation and SNV-AMD association estimates for the smoking cessation instrument.**

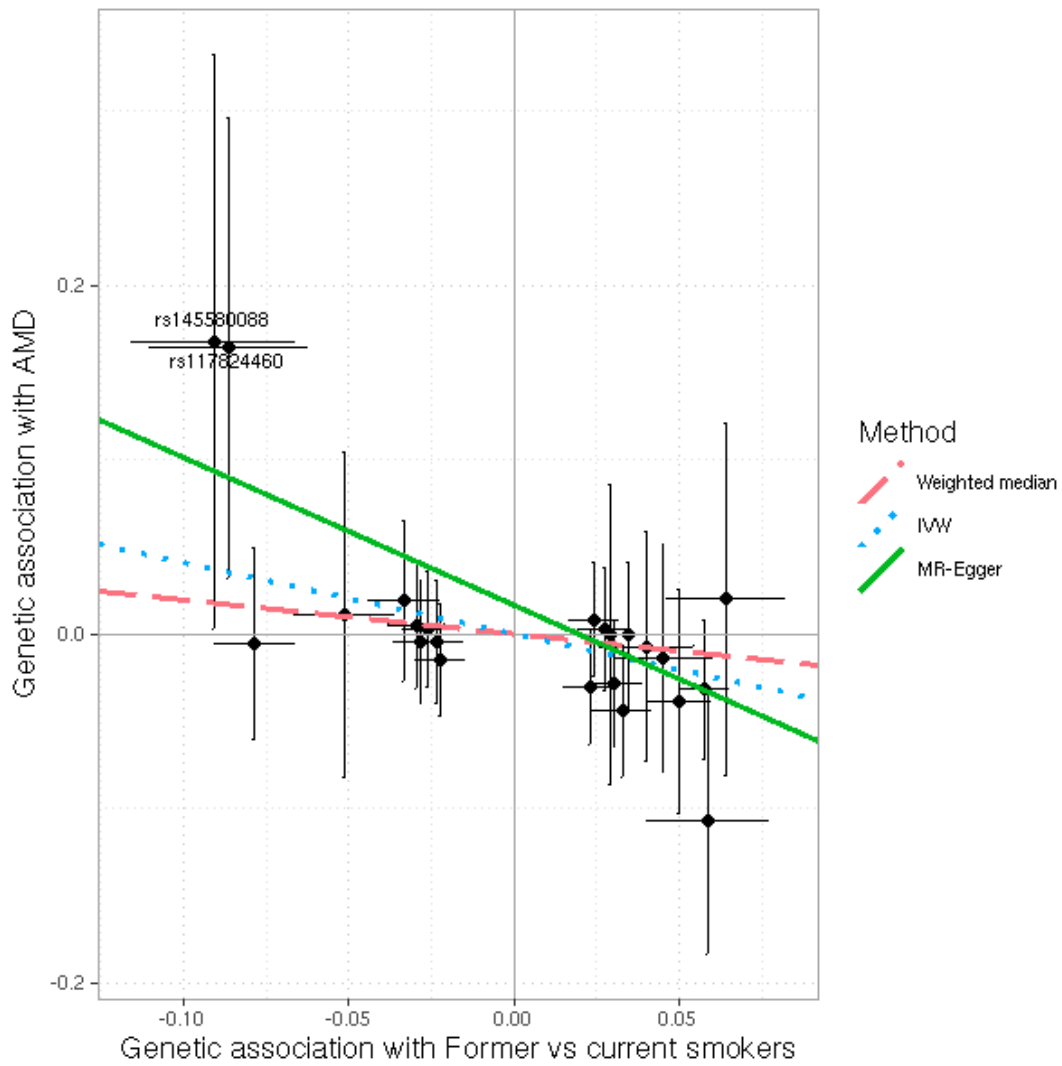

**Figure 3. Scatter plot of SNV-lifetime smoking and SNV-AMD association estimates for the lifetime smoking instrument.**

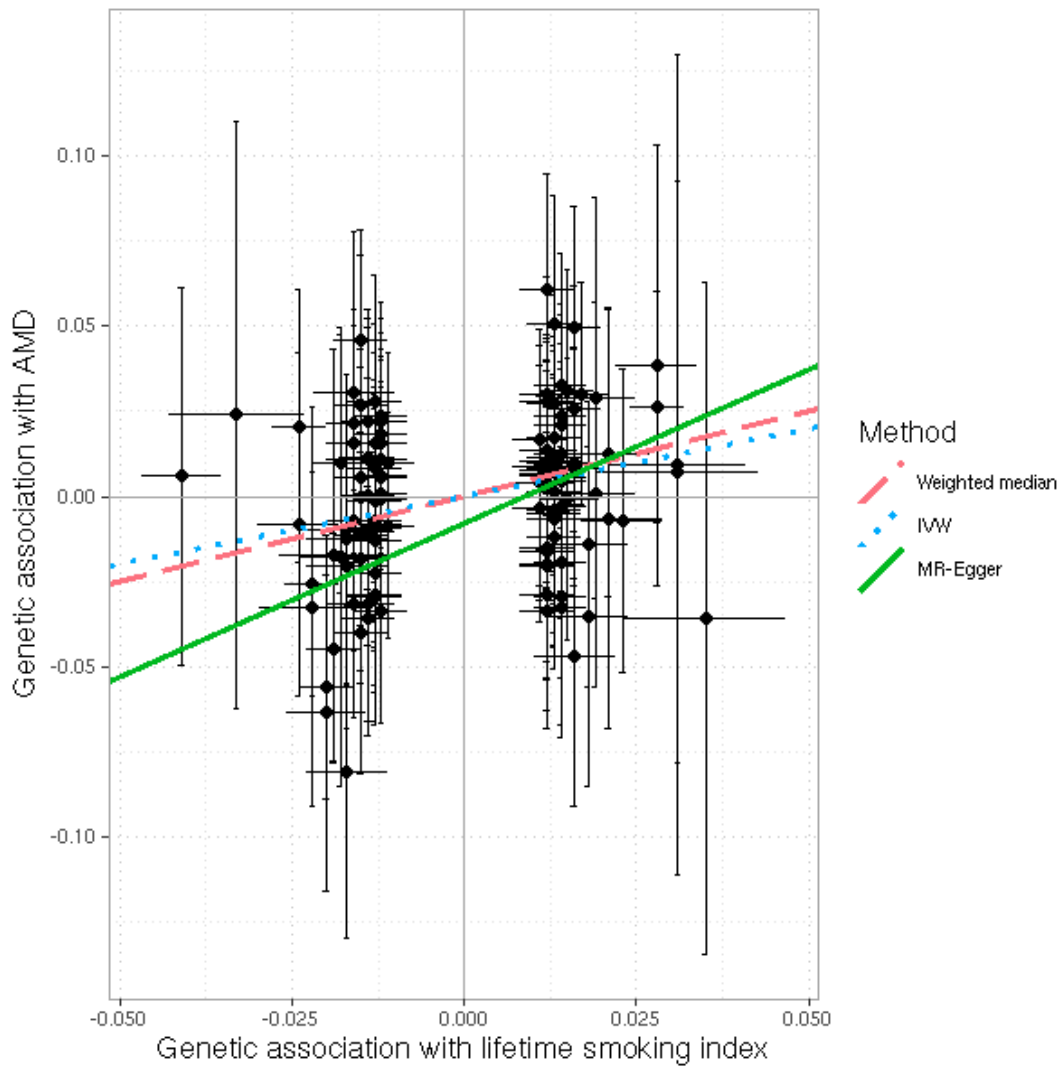



**Figure 4. Scatter plot of SNV-age at smoking initiation and SNV-AMD association estimates for the age at smoking initiation instrument.**

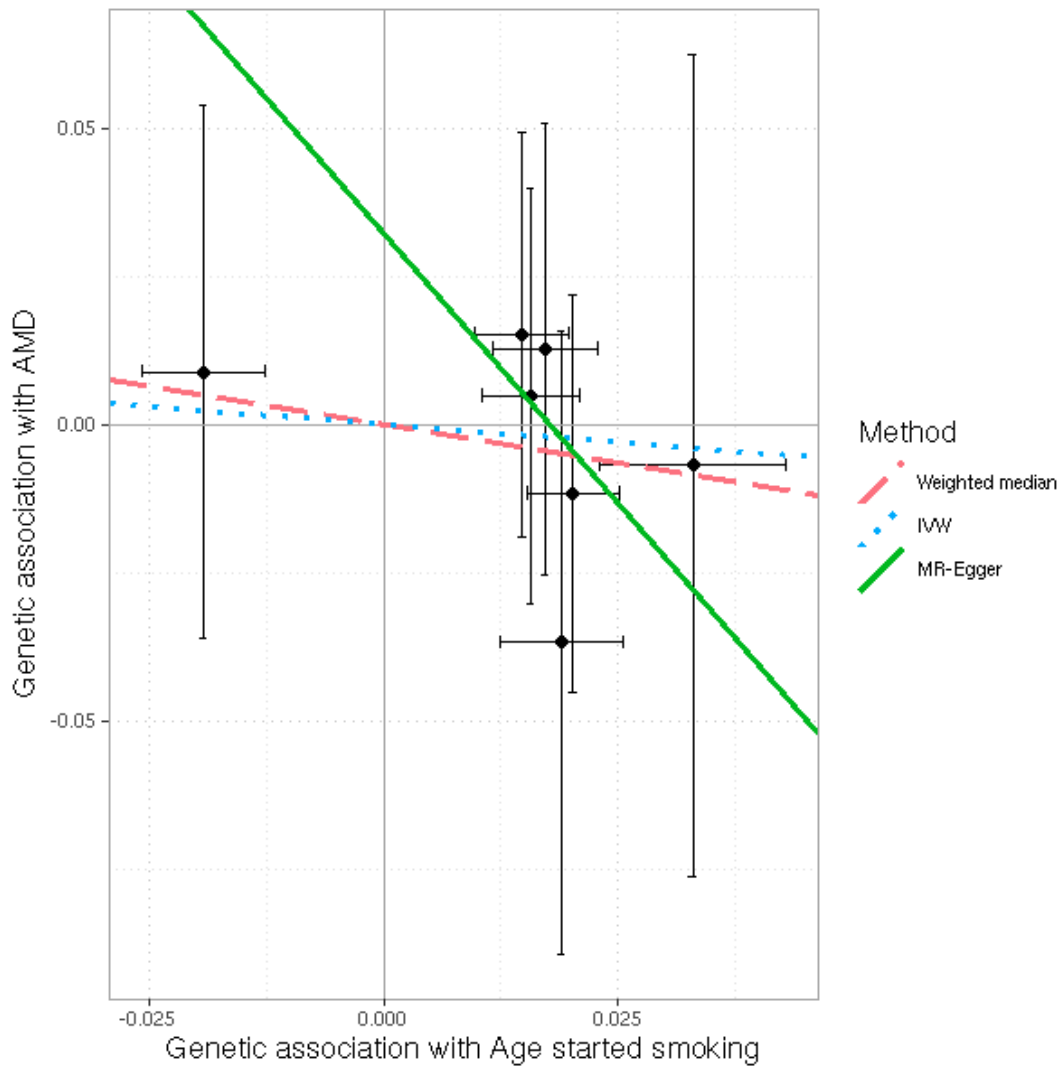

**eFigure 5. Scatter plot of SNV-alcoholic drinks per week and SNV-AMD association estimates for the alcohol intake per week instrument.**

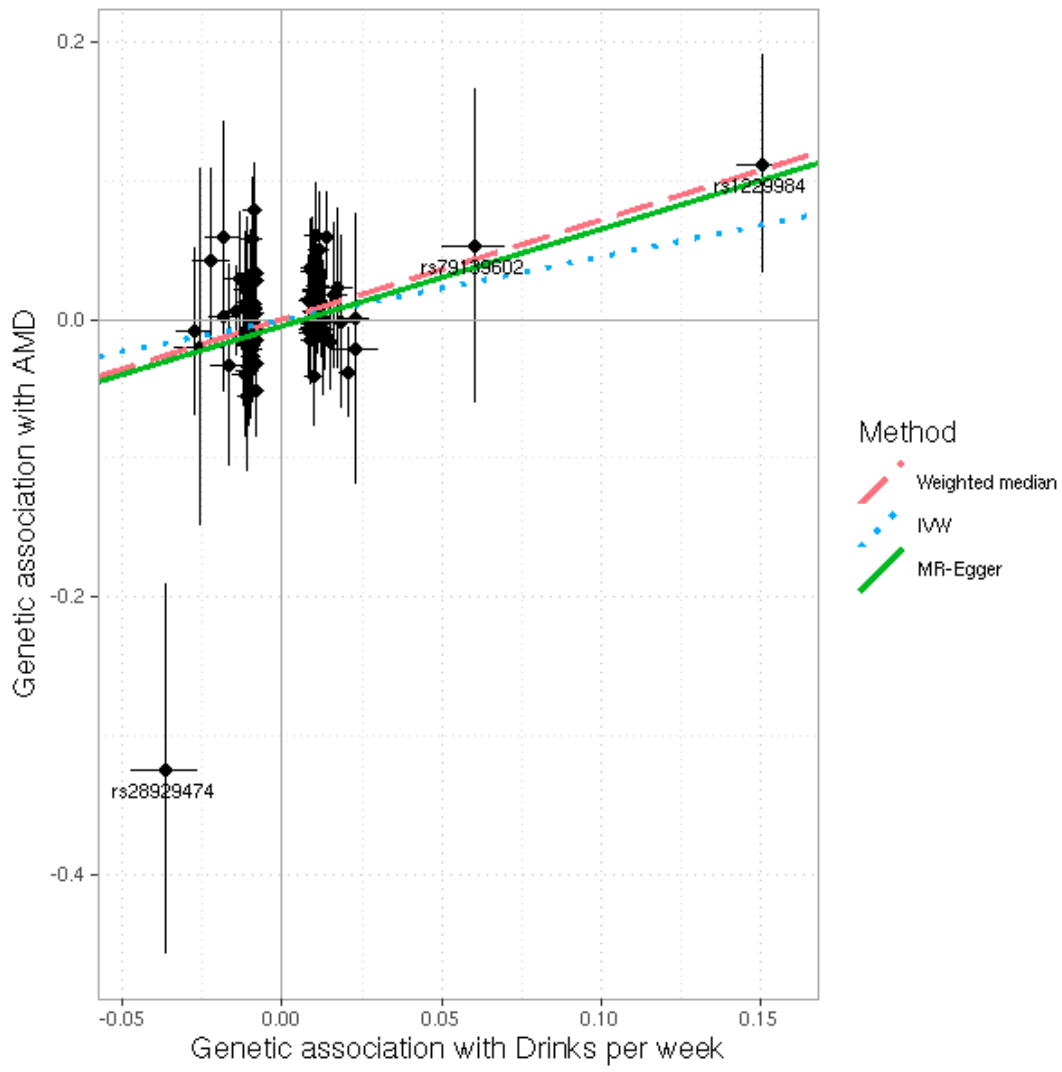

**eFigure 6. Scatter plot of SNV-BMI and SNV-AMD association estimates for the body mass index instrument.**

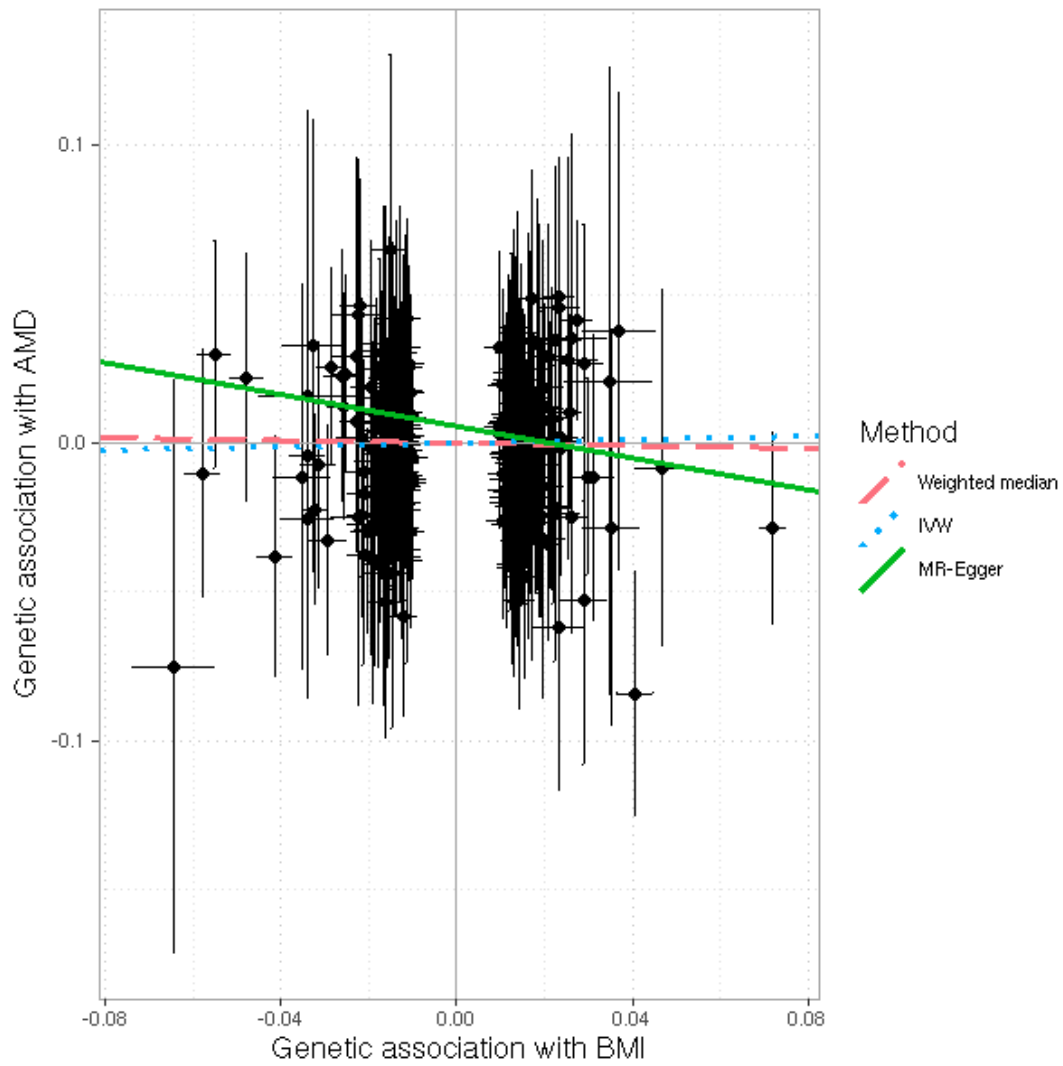

**Figure 7. Scatter plot of SNV-systolic blood pressure and SNV-AMD association estimates for the systolic blood pressure instrument.**

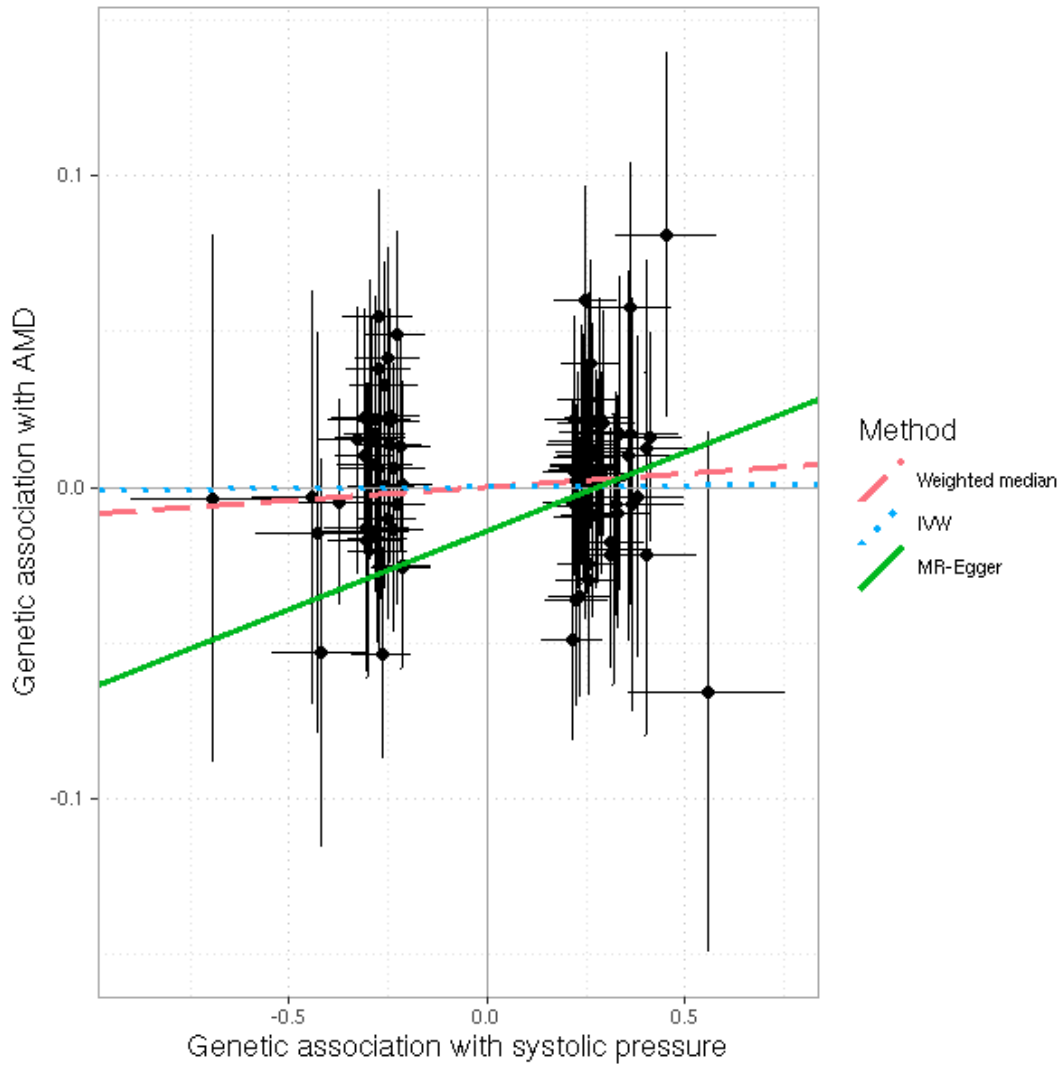

**Figure 8. Scatter plot of SNV-diastolic blood pressure and SNV-AMD association estimates for the diastolic blood pressure instrument.**

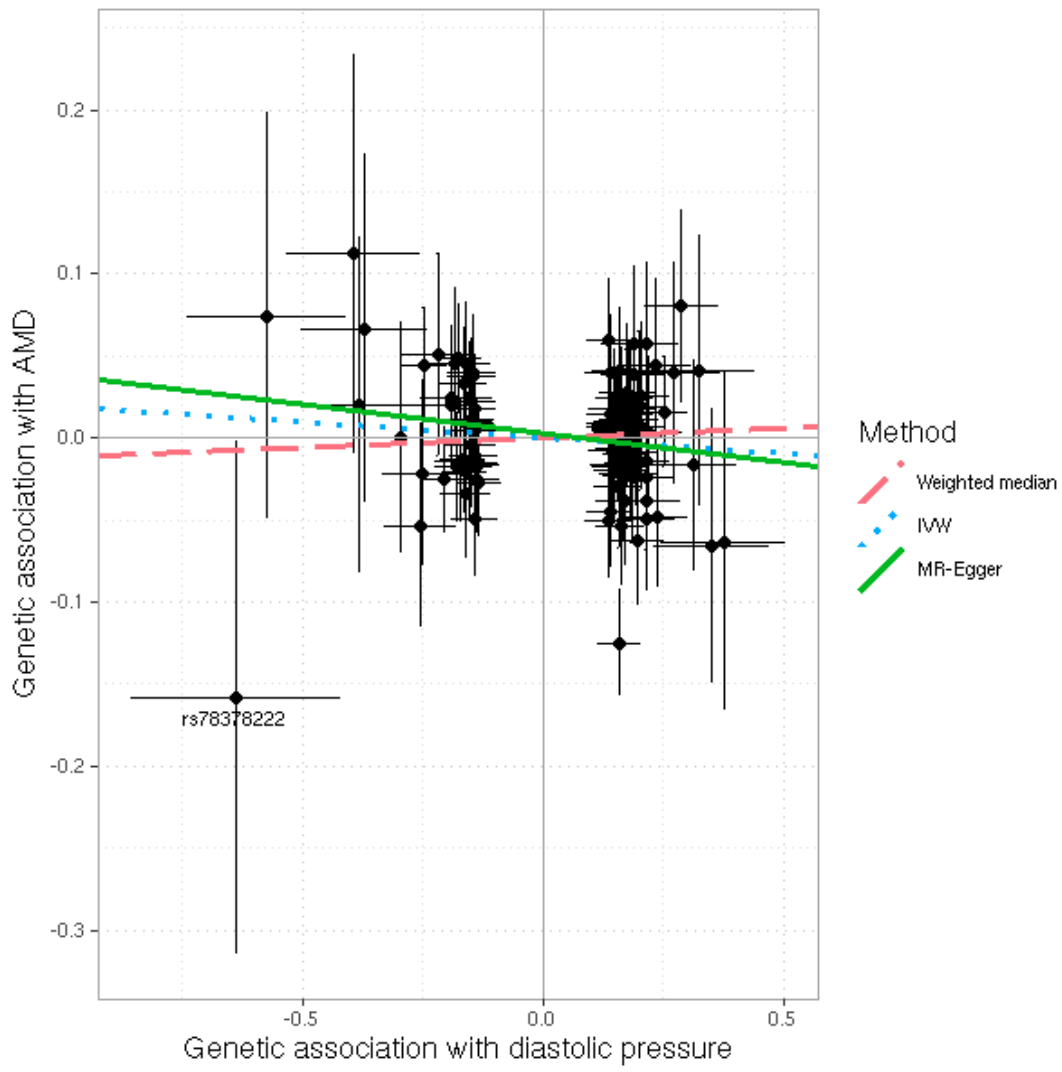

**Figure 9. Scatter plot of SNV–type 2 diabetes and SNV-AMD association estimates for the type 2 diabetes instrument.**

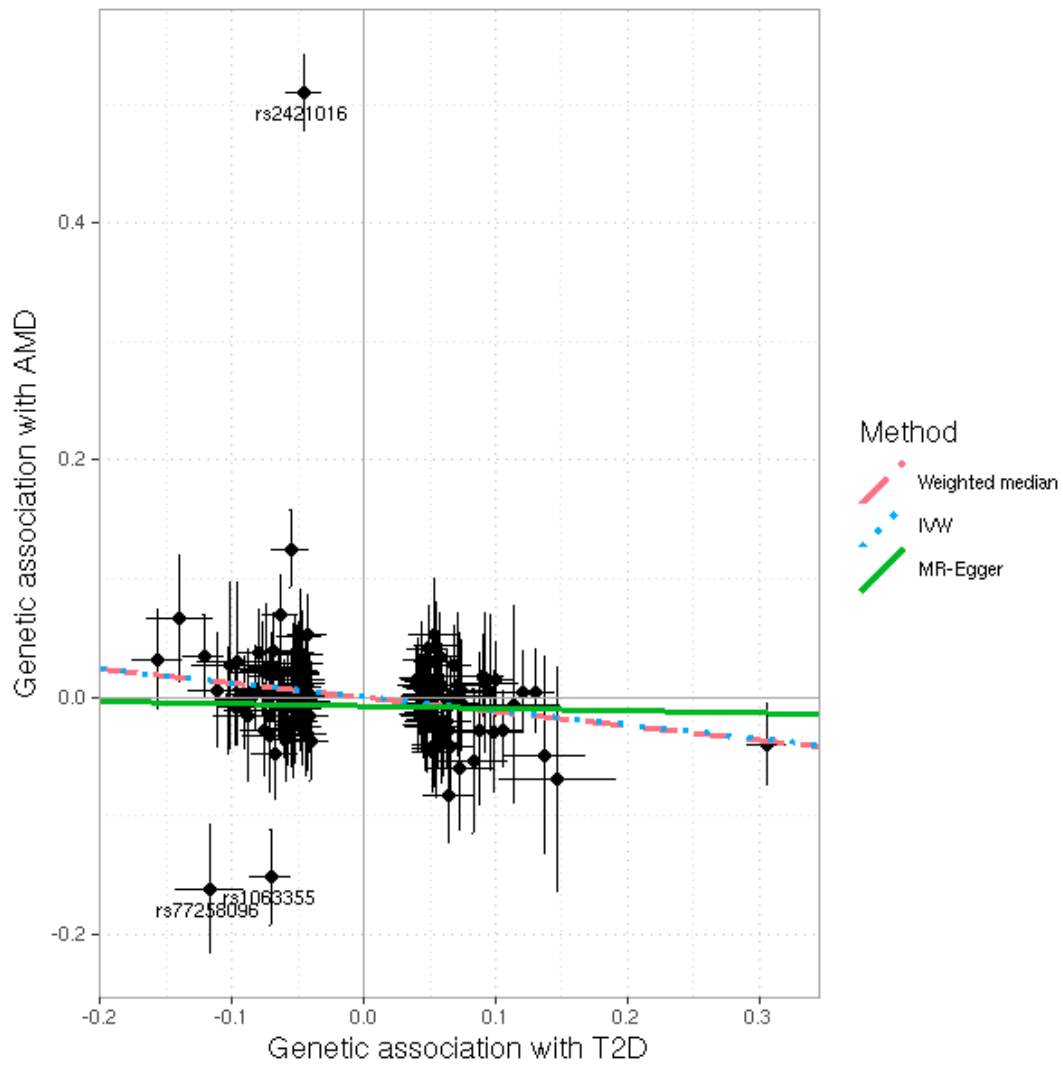

**eFigure 10. Scatter plot of SNV-HbA1c and SNV-AMD association estimates for the HbA1c instrument.**

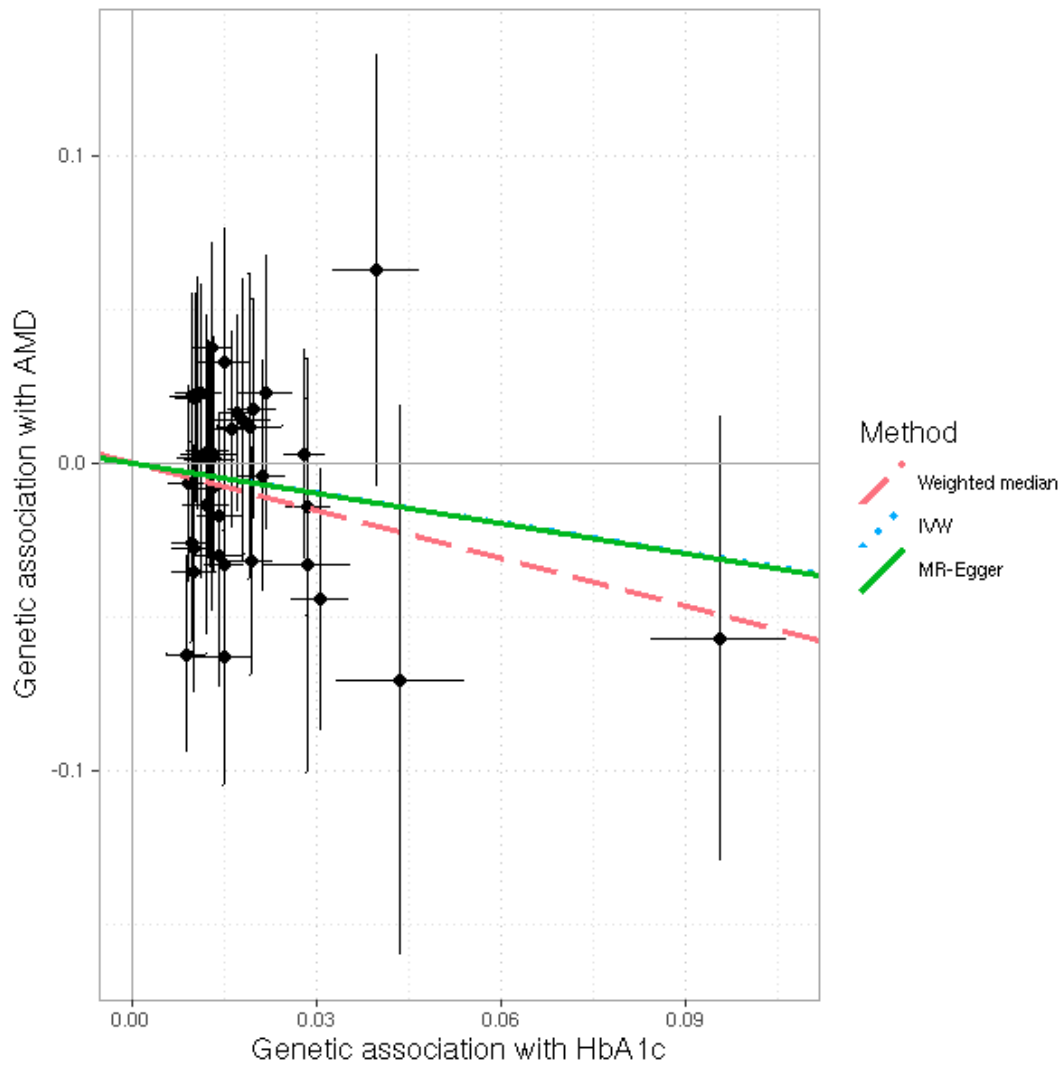

**Figure 11. Scatter plot of SNV-fasting glucose and SNV-AMD association estimates for the fasting glucose instrument.**

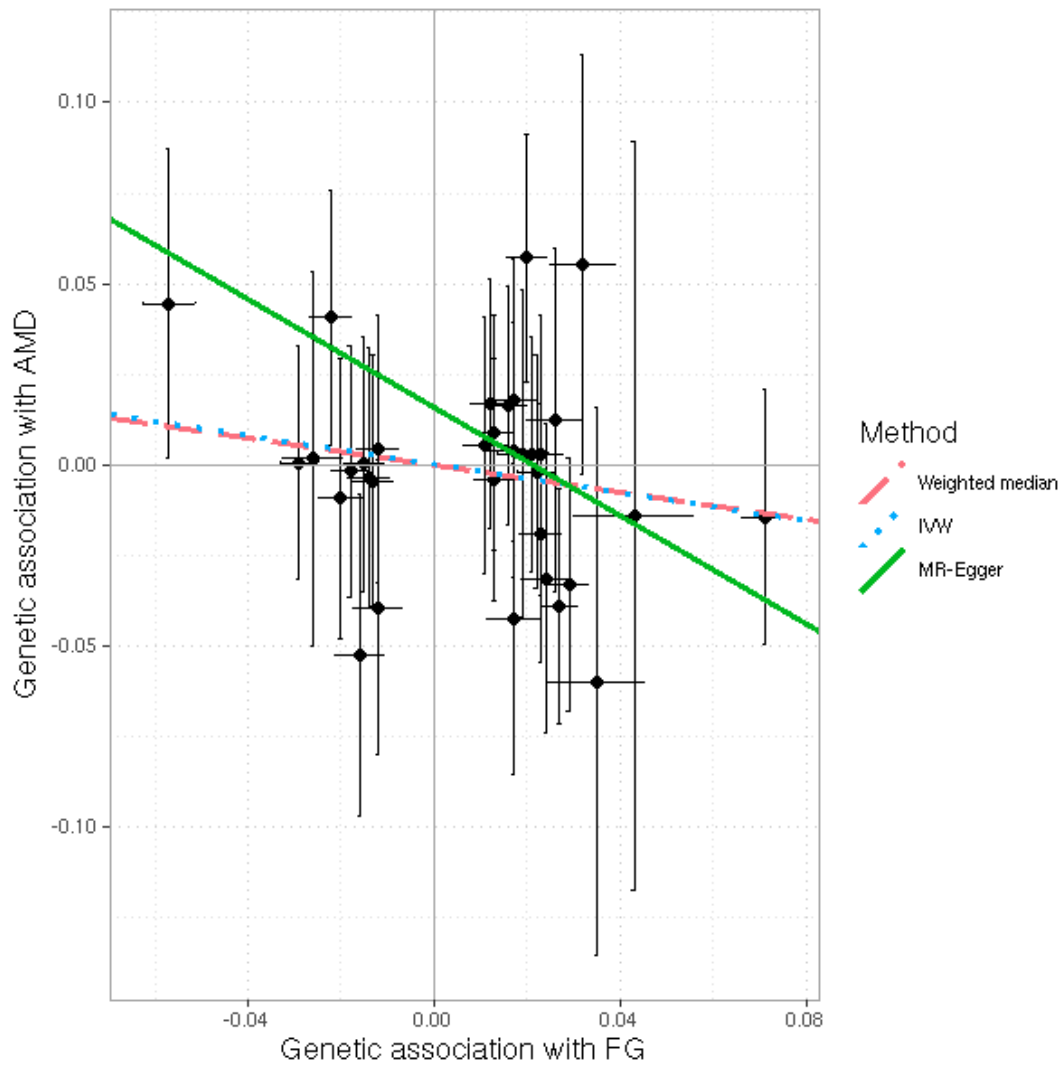



**eFigure12.** Scatter plot of SNV-fasting insulin and SNV-AMD association estimates for the fasting insulin instrument.

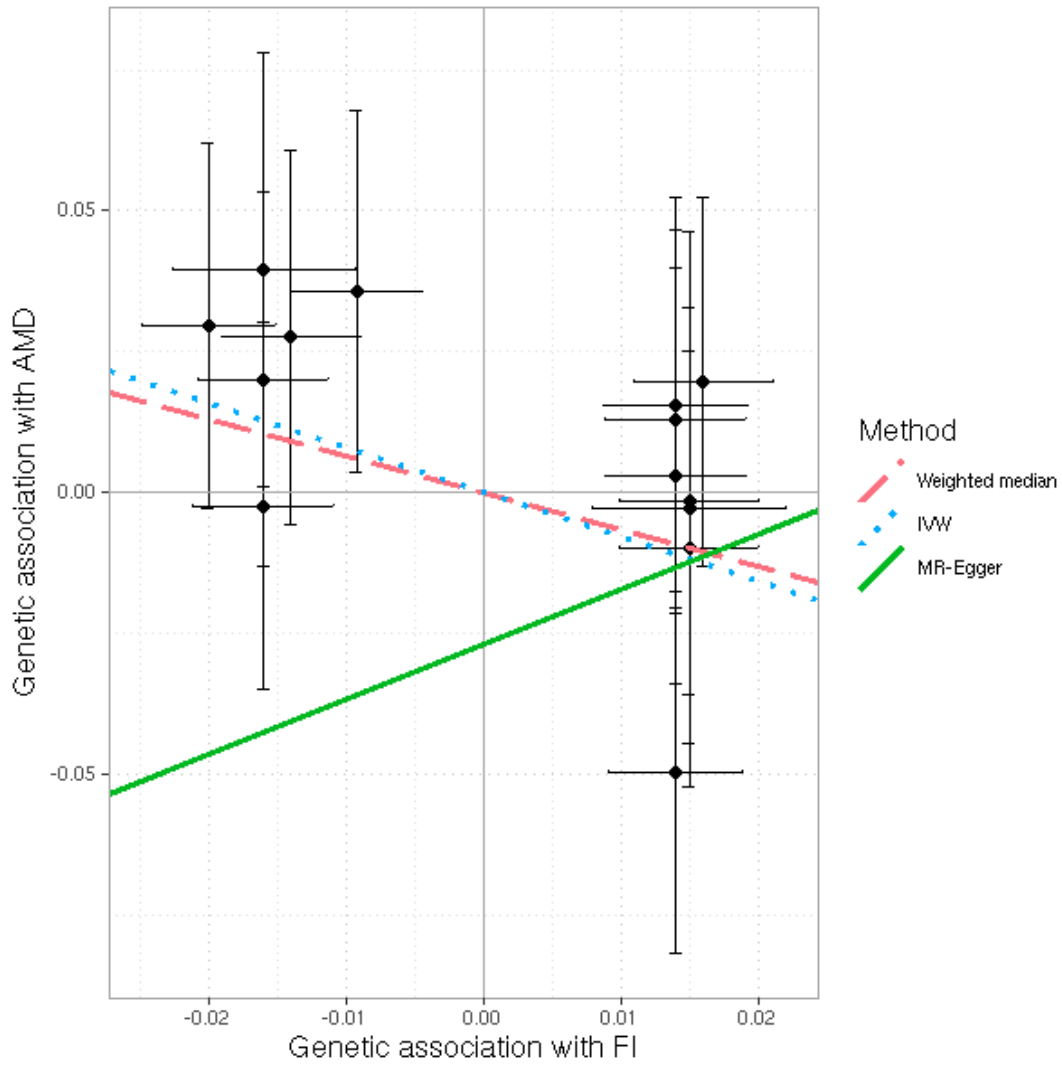

## References

- <sup>1</sup> Liu M, Jiang Y, Wedow R, et al. Association studies of up to 1.2 million individuals yield new insights into the genetic etiology of tobacco and alcohol use. *Nat Genet.* 2019;51(2):237-244. doi:10.1038/s41588-018-0307-5
- <sup>2</sup> Wootton, R., Richmond, R., Stuijffzand, B., Lawn, R., Sallis, H., Taylor, G., . . . Munafò, M. (2020). Evidence for causal effects of lifetime smoking on risk for depression and schizophrenia: A Mendelian randomisation study. *Psychological Medicine*, 50(14), 2435-2443. doi:10.1017/S0033291719002678
- <sup>3</sup> Sudlow, C. et al. UK biobank: an open access resource for identifying the causes of a wide range of complex diseases of middle and old age. *PLoS Med.* 12, e1001779 (2015)
- <sup>4</sup> Pulit SL, Stoneman C, Morris AP, Wood AR, Glastonbury CA, Tyrrell J, Yengo L, Ferreira T, Marouli E, Ji Y, Yang J, Jones S, Beaumont R, Croteau-Chonka DC, Winkler TW; GIANT Consortium, Hattersley AT, Loos RJF, Hirschhorn JN, Visscher PM, Frayling TM, Yaghootkar H, Lindgren CM. Meta-analysis of genome-wide association studies for body fat distribution in 694 649 individuals of European ancestry. *Hum Mol Genet.* 2019 Jan 1;28(1):166-174. doi: 10.1093/hmg/ddy327. PMID: 30239722; PMCID: PMC6298238.
- <sup>5</sup> Locke AE, Kahali B, Berndt SI, et al. Genetic studies of body mass index yield new insights for obesity biology. *Nature.* 2015;518:197–206. doi: 10.1038/nature14177.
- <sup>6</sup> Hoffmann TJ, Ehret GB, Nandakumar P, et al. Genome-wide association analyses using electronic health records identify new loci influencing blood pressure variation. *Nature genetics.* 2017;49(1):54-64. doi:10.1038/ng.3715.
- <sup>7</sup> Banda Y, Kvale MN, Hoffmann TJ, et al. Characterizing Race/Ethnicity and Genetic Ancestry for 100,000 Subjects in the Genetic Epidemiology Research on Adult Health and Aging (GERA) Cohort. *Genetics.* 2015;200(4):1285-1295. doi:10.1534/genetics.115.178616
- <sup>8</sup> Kvale MN, Hesselson S, Hoffmann TJ, et al. Genotyping Informatics and Quality Control for 100,000 Subjects in the Genetic Epidemiology Research on Adult Health and Aging (GERA) Cohort. *Genetics.* 2015;200(4):1051-1060. doi:10.1534/genetics.115.178905
- <sup>9</sup> International Consortium for Blood Pressure Genome-Wide Association Studies, Ehret GB, Munroe PB, et al. Genetic variants in novel pathways influence blood pressure and cardiovascular disease risk. *Nature.* 2011;478(7367):103-109. Published 2011 Sep 11. doi:10.1038/nature10405
- <sup>10</sup> Xue, A., Wu, Y., Zhu, Z. et al. Genome-wide association analyses identify 143 risk variants and putative regulatory mechanisms for type 2 diabetes. *Nat Commun* 9, 2941 (2018). <https://doi.org/10.1038/s41467-018-04951-w>
- <sup>11</sup> Morris AP, Voight BF, Teslovich TM, et al. Large-scale association analysis provides insights into the genetic architecture and pathophysiology of type 2 diabetes. *Nat Genet.* 2012;44:981–990. doi: 10.1038/ng.2383
- <sup>12</sup> Wheeler E, Leong A, Liu C-T, Hivert M-F, Strawbridge RJ, Podmore C, et al. (2017) Impact of common genetic determinants of Hemoglobin A1c on type 2 diabetes risk and diagnosis in ancestrally diverse populations: A transethnic genome-wide meta-analysis. *PLoS Med* 14(9): e1002383. <https://doi.org/10.1371/journal.pmed.1002383>
- <sup>13</sup> Scott RA, Lagou V, Welch RP, et al. Large-scale association analyses identify new loci influencing glycemic traits and provide insight into the underlying biological pathways. *Nat Genet.* 2012;44(9):991-1005. doi:10.1038/ng.2385
- <sup>14</sup> Fritsche, L., Igl, W., Bailey, J. et al. A large genome-wide association study of age-related macular degeneration highlights contributions of rare and common variants. *Nat Genet* 48, 134–143 (2016).
- <sup>15</sup> Bowden J, Holmes MV. Meta-analysis and Mendelian randomization: A review. *Res Synth Methods.* 2019 Dec;10(4):486-496. doi: 10.1002/jrsm.1346. Epub 2019 Apr 23. PMID: 30861319; PMCID: PMC6973275.
- <sup>16</sup> Greco M FD, Minelli C, Sheehan NA, Thompson JR. Detecting pleiotropy in Mendelian randomisation studies with summary data and a continuous outcome. *Stat Med.* 2015 Sep 20;34(21):2926-40. doi: 10.1002/sim.6522. Epub 2015 May 7. PMID: 25950993.
- <sup>17</sup> Hemani G, Bowden J, Davey Smith G. Evaluating the potential role of pleiotropy in Mendelian randomization studies. *Hum Mol Genet.* 2018;27(R2):R195-R208. doi:10.1093/hmg/ddy163
- <sup>18</sup> Burgess S, Davey Smith G, Davies NM et al. Guidelines for performing Mendelian randomization investigations [version 2; peer review: 2 approved]. *Wellcome Open Res* 2020, 4:186 (<https://doi.org/10.12688/wellcomeopenres.15555.2>)
- <sup>19</sup> Bowden J, Davey Smith G, Haycock PC, Burgess S. Consistent estimation in Mendelian randomization with some invalid instruments using a weighted median estimator. *Genet Epidemiol.* 2016;40:304–314.
- <sup>20</sup> Bowden J, Davey Smith G, Burgess S. Mendelian randomization with invalid instruments: effect estimation and bias detection through Egger regression. *Int J Epidemiol.* 2015;44:512–525.

- 
- <sup>21</sup> Verbanck M, Chen CY, Neale B, Do R. Detection of widespread horizontal pleiotropy in causal relationships inferred from Mendelian randomization between complex traits and diseases. *Nat Genet.* 2018 May;50(5):693-698. doi: 10.1038/s41588-018-0099-7. Epub 2018 Apr 23.
- <sup>22</sup> Burgess S, Thompson SG. Multivariable Mendelian randomization: the use of pleiotropic genetic variants to estimate causal effects. *Am J Epidemiol.* 2015 Feb 15;181(4):251-60. doi: 10.1093/aje/kwu283. Epub 2015 Jan 27. PMID: 25632051; PMCID: PMC4325677.
