# Supplementary material for: Association of Smoking, Alcohol Consumption, Blood Pressure, Body Mass Index, and Glycemic Risk Factors With Age-Related Macular Degeneration: A Mendelian Randomization Study
Source: PubMed Central journal article supplement (PMC8569599; doi:10.1001/jamaophthalmol.2021.4601), 2021-11-04
Supplement: jamaophthalmol-e214601-s002.pdf [file jamaophthalmol-e214601-s002.pdf]

\*Indicates required information. Only first name, last name, and suffix will appear in PubMed.

| <b>*Group Name(s): International AMD Genomics Consortium (IAMDGC)</b> |                   |                              |                  |                                                                                                               |                                          |                                                         |                                                                                            |
|-----------------------------------------------------------------------|-------------------|------------------------------|------------------|---------------------------------------------------------------------------------------------------------------|------------------------------------------|---------------------------------------------------------|--------------------------------------------------------------------------------------------|
| <b>*First Name and Middle Initial(s)</b>                              | <b>*Last Name</b> | <b>*Suffix (eg, Jr, III)</b> | Academic Degrees | Institution                                                                                                   | Location (city, state/province, country) | Role or Contribution, eg, chair, principal investigator | Group (if more than 1 Group listed in the byline) and/or Subgroup (eg, Steering Committee) |
| Lars G                                                                | Fritsche          |                              |                  | Center for Statistical Genetics, Department of Biostatistics, University of Michigan                          | Ann Arbor, Michigan, USA                 |                                                         | International AMD Genomics Consortium                                                      |
| Wilmar                                                                | Igl               |                              |                  | Department of Genetic Epidemiology, University of Regensburg                                                  | Regensburg, Germany                      |                                                         | International AMD Genomics Consortium                                                      |
| Jessica N                                                             | Cooke Bailey      |                              |                  | Department of Epidemiology and Biostatistics, Case Western Reserve University School of Medicine              | Cleveland, Ohio, USA                     |                                                         | International AMD Genomics Consortium                                                      |
| Felix                                                                 | Grassmann         |                              |                  | Institute of Human Genetics, University of Regensburg                                                         | Regensburg, Germany                      |                                                         | International AMD Genomics Consortium                                                      |
| Sebanti                                                               | Sengupta          |                              |                  | Center for Statistical Genetics, Department of Biostatistics, University of Michigan                          | Ann Arbor, Michigan, USA                 |                                                         | International AMD Genomics Consortium                                                      |
| Jennifer L                                                            | Bragg-Gresham     |                              |                  | Center for Statistical Genetics, Department of Biostatistics, University of Michigan                          | Ann Arbor, Michigan, USA                 |                                                         | International AMD Genomics Consortium                                                      |
|                                                                       |                   |                              |                  | Kidney Epidemiology and Cost Center, Department of Internal Medicine–Nephrology, University of Michigan       | Ann Arbor, Michigan, USA                 |                                                         | International AMD Genomics Consortium                                                      |
| Kathryn P                                                             | Burdon            |                              |                  | School of Medicine, Menzies Research Institute Tasmania, University of Tasmania                               | Hobart, Tasmania, Australia              |                                                         | International AMD Genomics Consortium                                                      |
| Scott J                                                               | Hebbring          |                              |                  | Center for Human Genetics, Marshfield Clinic Research Foundation                                              | Marshfield, Wisconsin, USA               |                                                         | International AMD Genomics Consortium                                                      |
| Cindy                                                                 | Wen               |                              |                  | Department of Ophthalmology, University of California, San Diego and Veterans Affairs San Diego Health System | La Jolla, California, USA                |                                                         | International AMD Genomics Consortium                                                      |

## Supplemental Online Content: Nonauthor Collaborators

\*Indicates required information. Only first name, last name, and suffix will appear in PubMed.

| *First Name and Middle Initial(s) | *Last Name | *Suffix (eg, Jr, III) | Academic Degrees | Institution                                                                                    | Location (city, state/province, country) | Role or Contribution, eg, chair, principal investigator | Group (if more than 1 Group listed in the byline) and/or Subgroup (eg, Steering Committee) |
|-----------------------------------|------------|-----------------------|------------------|------------------------------------------------------------------------------------------------|------------------------------------------|---------------------------------------------------------|--------------------------------------------------------------------------------------------|
| Mathias                           | Gorski     |                       |                  | Department of Genetic Epidemiology, University of Regensburg                                   | Regensburg, Germany                      |                                                         | International AMD Genomics Consortium                                                      |
| Ivana K                           | Kim        |                       |                  | Retina Service, Massachusetts Eye and Ear, Department of Ophthalmology, Harvard Medical School | Boston, Massachusetts, USA               |                                                         | International AMD Genomics Consortium                                                      |
| David                             | Cho        |                       |                  | Department of Ophthalmology, Perelman School of Medicine, University of Pennsylvania           | Philadelphia, Pennsylvania, USA          |                                                         | International AMD Genomics Consortium                                                      |
| Donald                            | Zack       |                       |                  | Department of Ophthalmology, Wilmer Eye Institute, Johns Hopkins University School of Medicine | Baltimore, Maryland, USA                 |                                                         | International AMD Genomics Consortium                                                      |
|                                   |            |                       |                  | Department of Molecular Biology and Genetics, Johns Hopkins University School of Medicine      | Baltimore, Maryland, USA                 |                                                         | International AMD Genomics Consortium                                                      |
|                                   |            |                       |                  | Department of Neuroscience, Johns Hopkins University School of Medicine                        | Baltimore, Maryland, USA                 |                                                         | International AMD Genomics Consortium                                                      |
|                                   |            |                       |                  | Institute of Genetic Medicine, Johns Hopkins University School of Medicine                     | Baltimore, Maryland, USA                 |                                                         | International AMD Genomics Consortium                                                      |
|                                   |            |                       |                  | Institut de la Vision, Université Pierre et Marie Curie                                        | Paris, France                            |                                                         | International AMD Genomics Consortium                                                      |
| Eric                              | Souied     |                       |                  | Hôpital Intercommunal de Créteil, Hôpital Henri Mondor, Université Paris Est Créteil           | Créteil, France                          |                                                         | International AMD Genomics Consortium                                                      |
| Hendrik P N                       | Scholl     |                       |                  | Department of Ophthalmology, Wilmer Eye Institute, Johns Hopkins University School of Medicine | Baltimore, Maryland, USA                 |                                                         | International AMD Genomics Consortium                                                      |
|                                   |            |                       |                  | Department of Ophthalmology, University of Bonn                                                | Bonn, Germany                            |                                                         | International AMD Genomics Consortium                                                      |

## Supplemental Online Content: Nonauthor Collaborators

\*Indicates required information. Only first name, last name, and suffix will appear in PubMed.

| *First Name and Middle Initial(s) | *Last Name | *Suffix (eg, Jr, III) | Academic Degrees | Institution                                                                                                                          | Location (city, state/province, country) | Role or Contribution, eg, chair, principal investigator | Group (if more than 1 Group listed in the byline) and/or Subgroup (eg, Steering Committee) |
|-----------------------------------|------------|-----------------------|------------------|--------------------------------------------------------------------------------------------------------------------------------------|------------------------------------------|---------------------------------------------------------|--------------------------------------------------------------------------------------------|
| Elisa                             | Bala       |                       |                  | Louis Stokes Cleveland Veterans Affairs Medical Center                                                                               | Cleveland, Ohio, USA                     |                                                         | International AMD Genomics Consortium                                                      |
| Kristine E                        | Lee        |                       |                  | Department of Ophthalmology and Visual Sciences, University of Wisconsin                                                             | Madison, Wisconsin, USA                  |                                                         | International AMD Genomics Consortium                                                      |
| David J                           | Hunter     |                       |                  | Department of Epidemiology, Harvard School of Public Health                                                                          | Boston, Massachusetts, USA               |                                                         | International AMD Genomics Consortium                                                      |
|                                   |            |                       |                  | Department of Nutrition, Harvard School of Public Health                                                                             | Boston, Massachusetts, USA               |                                                         | International AMD Genomics Consortium                                                      |
| Rebecca J                         | Sardell    |                       |                  | John P Hussman Institute for Human Genomics, Miller School of Medicine, University of Miami                                          | Miami, Florida, USA                      |                                                         | International AMD Genomics Consortium                                                      |
| Paul                              | Mitchell   |                       |                  | Centre for Vision Research, Department of Ophthalmology and Westmead Millennium Institute for Medical Research, University of Sydney | Sydney, New South Wales, Australia       |                                                         | International AMD Genomics Consortium                                                      |
| Joanna E                          | Merriam    |                       |                  | Department of Ophthalmology, Columbia University                                                                                     | New York, New York, USA                  |                                                         | International AMD Genomics Consortium                                                      |
| Joshua D                          | Hoffman    |                       |                  | Center for Human Genetics Research, Vanderbilt University Medical Center                                                             | Nashville, Tennessee, USA                |                                                         | International AMD Genomics Consortium                                                      |
| Tina                              | Schick     |                       |                  | Department of Ophthalmology, University Hospital of Cologne                                                                          | Cologne, Germany                         |                                                         | International AMD Genomics Consortium                                                      |
| Yara T E                          | Lechanteur |                       |                  | Department of Ophthalmology, Radboud University Medical Centre                                                                       | Nijmegen, the Netherlands                |                                                         | International AMD Genomics Consortium                                                      |
| Robyn H                           | Guymer     |                       |                  | Centre for Eye Research Australia, University of Melbourne, Royal Victorian Eye and Ear Hospital                                     | East Melbourne, Victoria, Australia      |                                                         | International AMD Genomics Consortium                                                      |
| Matthew P                         | Johnson    |                       |                  | South Texas Diabetes and Obesity Institute, School of Medicine, University of Texas Rio Grande Valley                                | Brownsville, Texas, USA                  |                                                         | International AMD Genomics Consortium                                                      |

## Supplemental Online Content: Nonauthor Collaborators

\*Indicates required information. Only first name, last name, and suffix will appear in PubMed.

| *First Name and Middle Initial(s) | *Last Name | *Suffix (eg, Jr, III) | Academic Degrees | Institution                                                                                                               | Location (city, state/province, country) | Role or Contribution, eg, chair, principal investigator | Group (if more than 1 Group listed in the byline) and/or Subgroup (eg, Steering Committee) |
|-----------------------------------|------------|-----------------------|------------------|---------------------------------------------------------------------------------------------------------------------------|------------------------------------------|---------------------------------------------------------|--------------------------------------------------------------------------------------------|
| Yingda                            | Jiang      |                       |                  | Department of Biostatistics, Graduate School of Public Health, University of Pittsburgh                                   | Pittsburgh, Pennsylvania, USA            |                                                         | International AMD Genomics Consortium                                                      |
| Chloe M                           | Stanton    |                       |                  | Medical Research Council (MRC) Human Genetics Unit, Institute of Genetics and Molecular Medicine, University of Edinburgh | Edinburgh, UK                            |                                                         | International AMD Genomics Consortium                                                      |
| Gabriëlle H S                     | Buitendijk |                       |                  | Department of Ophthalmology, Erasmus Medical Center                                                                       | Rotterdam, the Netherlands               |                                                         | International AMD Genomics Consortium                                                      |
|                                   |            |                       |                  | Department of Epidemiology, Erasmus Medical Center                                                                        | Rotterdam, the Netherlands               |                                                         | International AMD Genomics Consortium                                                      |
| Xiaowei                           | Zhan       |                       |                  | Center for Statistical Genetics, Department of Biostatistics, University of Michigan                                      | Ann Arbor, Michigan, USA                 |                                                         | International AMD Genomics Consortium                                                      |
|                                   |            |                       |                  | Quantitative Biomedical Research Center, Department of Clinical Science, University of Texas Southwestern Medical Center  | Dallas, Texas, USA                       |                                                         | International AMD Genomics Consortium                                                      |
|                                   |            |                       |                  | Center for the Genetics of Host Defense, University of Texas Southwestern Medical Center                                  | Dallas, Texas, USA                       |                                                         | International AMD Genomics Consortium                                                      |
| Alan M                            | Kwong      |                       |                  | Center for Statistical Genetics, Department of Biostatistics, University of Michigan                                      | Ann Arbor, Michigan, USA                 |                                                         | International AMD Genomics Consortium                                                      |
| Alexis                            | Boleda     |                       |                  | Neurobiology, Neurodegeneration and Repair Laboratory (N-NRL), National Eye Institute, US National Institutes of Health   | Bethesda, Maryland, USA                  |                                                         | International AMD Genomics Consortium                                                      |
| Matthew                           | Brooks     |                       |                  | Neurobiology, Neurodegeneration and Repair Laboratory (N-NRL), National Eye Institute, US National Institutes of Health   | Bethesda, Maryland, USA                  |                                                         | International AMD Genomics Consortium                                                      |

## Supplemental Online Content: Nonauthor Collaborators

\*Indicates required information. Only first name, last name, and suffix will appear in PubMed.

| *First Name and Middle Initial(s) | *Last Name   | *Suffix (eg, Jr, III) | Academic Degrees | Institution                                                                                                             | Location (city, state/province, country) | Role or Contribution, eg, chair, principal investigator | Group (if more than 1 Group listed in the byline) and/or Subgroup (eg, Steering Committee) |
|-----------------------------------|--------------|-----------------------|------------------|-------------------------------------------------------------------------------------------------------------------------|------------------------------------------|---------------------------------------------------------|--------------------------------------------------------------------------------------------|
| Linn                              | Gieser       |                       |                  | Neurobiology, Neurodegeneration and Repair Laboratory (N-NRL), National Eye Institute, US National Institutes of Health | Bethesda, Maryland, USA                  |                                                         | International AMD Genomics Consortium                                                      |
| Rinki                             | Ratnapriya   |                       |                  | Neurobiology, Neurodegeneration and Repair Laboratory (N-NRL), National Eye Institute, US National Institutes of Health | Bethesda, Maryland, USA                  |                                                         | International AMD Genomics Consortium                                                      |
| Kari E                            | Branham      |                       |                  | Department of Ophthalmology and Visual Sciences, University of Michigan, Kellogg Eye Center                             | Ann Arbor, Michigan, USA                 |                                                         | International AMD Genomics Consortium                                                      |
| Johanna R                         | Foerster     |                       |                  | Center for Statistical Genetics, Department of Biostatistics, University of Michigan                                    | Ann Arbor, Michigan, USA                 |                                                         | International AMD Genomics Consortium                                                      |
| John R                            | Heckenlively |                       |                  | Department of Ophthalmology and Visual Sciences, University of Michigan, Kellogg Eye Center                             | Ann Arbor, Michigan, USA                 |                                                         | International AMD Genomics Consortium                                                      |
| Mohammad I                        | Othman       |                       |                  | Department of Ophthalmology and Visual Sciences, University of Michigan, Kellogg Eye Center                             | Ann Arbor, Michigan, USA                 |                                                         | International AMD Genomics Consortium                                                      |
| Brendan J                         | Vote         |                       |                  | School of Medicine, Menzies Research Institute Tasmania, University of Tasmania                                         | Hobart, Tasmania, Australia              |                                                         | International AMD Genomics Consortium                                                      |
| Helena Hai                        | Liang        |                       |                  | Centre for Eye Research Australia, University of Melbourne, Royal Victorian Eye and Ear Hospital                        | East Melbourne, Victoria, Australia      |                                                         | International AMD Genomics Consortium                                                      |
| Emmanuelle                        | Souzeau      |                       |                  | Department of Ophthalmology, Flinders Medical Centre, Flinders University                                               | Adelaide, South Australia, Australia     |                                                         | International AMD Genomics Consortium                                                      |
| Ian L                             | McAllister   |                       |                  | Centre for Ophthalmology and Visual Science, Lions Eye Institute, University of Western Australia                       | Perth, Western Australia, Australia      |                                                         | International AMD Genomics Consortium                                                      |
| Timothy                           | Isaacs       |                       |                  | Centre for Ophthalmology and Visual Science, Lions Eye Institute, University of Western Australia                       | Perth, Western Australia, Australia      |                                                         | International AMD Genomics Consortium                                                      |

## Supplemental Online Content: Nonauthor Collaborators

\*Indicates required information. Only first name, last name, and suffix will appear in PubMed.

| *First Name and Middle Initial(s) | *Last Name | *Suffix (eg, Jr, III) | Academic Degrees | Institution                                                                                                                                                                       | Location (city, state/province, country) | Role or Contribution, eg, chair, principal investigator | Group (if more than 1 Group listed in the byline) and/or Subgroup (eg, Steering Committee) |
|-----------------------------------|------------|-----------------------|------------------|-----------------------------------------------------------------------------------------------------------------------------------------------------------------------------------|------------------------------------------|---------------------------------------------------------|--------------------------------------------------------------------------------------------|
| Janette                           | Hall       |                       |                  | Department of Ophthalmology, Flinders Medical Centre, Flinders University                                                                                                         | Adelaide, South Australia, Australia     |                                                         | International AMD Genomics Consortium                                                      |
| Stewart                           | Lake       |                       |                  | Department of Ophthalmology, Flinders Medical Centre, Flinders University                                                                                                         | Adelaide, South Australia, Australia     |                                                         | International AMD Genomics Consortium                                                      |
| David A                           | Mackey     |                       |                  | School of Medicine, Menzies Research Institute Tasmania, University of Tasmania                                                                                                   | Hobart, Tasmania, Australia              |                                                         | International AMD Genomics Consortium                                                      |
|                                   |            |                       |                  | Centre for Eye Research Australia, University of Melbourne, Royal Victorian Eye and Ear Hospital                                                                                  | East Melbourne, Victoria, Australia      |                                                         | International AMD Genomics Consortium                                                      |
|                                   |            |                       |                  | Centre for Ophthalmology and Visual Science, Lions Eye Institute, University of Western Australia                                                                                 | Perth, Western Australia, Australia      |                                                         | International AMD Genomics Consortium                                                      |
| Ian J                             | Constable  |                       |                  | Centre for Ophthalmology and Visual Science, Lions Eye Institute, University of Western Australia                                                                                 | Perth, Western Australia, Australia      |                                                         | International AMD Genomics Consortium                                                      |
| Jamie E                           | Craig      |                       |                  | Department of Ophthalmology, Flinders Medical Centre, Flinders University                                                                                                         | Adelaide, South Australia, Australia     |                                                         | International AMD Genomics Consortium                                                      |
| Terrie E                          | Kitchner   |                       |                  | Center for Human Genetics, Marshfield Clinic Research Foundation                                                                                                                  | Marshfield, Wisconsin, USA               |                                                         | International AMD Genomics Consortium                                                      |
| Zhenglin                          | Yang       |                       |                  | Sichuan Provincial Key Laboratory for Human Disease Gene Study, Hospital of the University of Electronic Science and Technology of China and Sichuan Provincial People's Hospital | Chengdu, China                           |                                                         | International AMD Genomics Consortium                                                      |
|                                   |            |                       |                  | Sichuan Translational Medicine Hospital, Chinese Academy of Sciences                                                                                                              | Chengdu, China                           |                                                         | International AMD Genomics Consortium                                                      |

## Supplemental Online Content: Nonauthor Collaborators

\*Indicates required information. Only first name, last name, and suffix will appear in PubMed.

| *First Name and Middle Initial(s) | *Last Name | *Suffix (eg, Jr, III) | Academic Degrees | Institution                                                                                                     | Location (city, state/province, country) | Role or Contribution, eg, chair, principal investigator | Group (if more than 1 Group listed in the byline) and/or Subgroup (eg, Steering Committee) |
|-----------------------------------|------------|-----------------------|------------------|-----------------------------------------------------------------------------------------------------------------|------------------------------------------|---------------------------------------------------------|--------------------------------------------------------------------------------------------|
| Zhiguang                          | Su         |                       |                  | Molecular Medicine Research Center, State Key Laboratory of Biotherapy, West China Hospital, Sichuan University | Chengdu, China                           |                                                         | International AMD Genomics Consortium                                                      |
| Hongrong                          | Luo        |                       |                  | Department of Ophthalmology, University of California, San Diego and Veterans Affairs San Diego Health System   | La Jolla, California, USA                |                                                         | International AMD Genomics Consortium                                                      |
| Daniel                            | Chen       |                       |                  | Department of Ophthalmology, University of California, San Diego and Veterans Affairs San Diego Health System   | La Jolla, California, USA                |                                                         | International AMD Genomics Consortium                                                      |
| Hong                              | Ouyang     |                       |                  | Department of Ophthalmology, University of California, San Diego and Veterans Affairs San Diego Health System   | La Jolla, California, USA                |                                                         | International AMD Genomics Consortium                                                      |
| Ken                               | Flagg      |                       |                  | Department of Ophthalmology, University of California, San Diego and Veterans Affairs San Diego Health System   | La Jolla, California, USA                |                                                         | International AMD Genomics Consortium                                                      |
| Danni                             | Lin        |                       |                  | Department of Ophthalmology, University of California, San Diego and Veterans Affairs San Diego Health System   | La Jolla, California, USA                |                                                         | International AMD Genomics Consortium                                                      |
| Guanping                          | Mao        |                       |                  | Department of Ophthalmology, University of California, San Diego and Veterans Affairs San Diego Health System   | La Jolla, California, USA                |                                                         | International AMD Genomics Consortium                                                      |
| Henry                             | Ferreyra   |                       |                  | Department of Ophthalmology, University of California, San Diego and Veterans Affairs San Diego Health System   | La Jolla, California, USA                |                                                         | International AMD Genomics Consortium                                                      |
| Klaus                             | Stark      |                       |                  | Department of Genetic Epidemiology, University of Regensburg                                                    | Regensburg, Germany                      |                                                         | International AMD Genomics Consortium                                                      |

## Supplemental Online Content: Nonauthor Collaborators

\*Indicates required information. Only first name, last name, and suffix will appear in PubMed.

| *First Name and Middle Initial(s) | *Last Name | *Suffix (eg, Jr, III) | Academic Degrees | Institution                                                                                           | Location (city, state/province, country) | Role or Contribution, eg, chair, principal investigator | Group (if more than 1 Group listed in the byline) and/or Subgroup (eg, Steering Committee) |
|-----------------------------------|------------|-----------------------|------------------|-------------------------------------------------------------------------------------------------------|------------------------------------------|---------------------------------------------------------|--------------------------------------------------------------------------------------------|
| Claudia N von                     | Strachwitz |                       |                  | EyeCentre Southwest                                                                                   | Stuttgart, Germany                       |                                                         | International AMD Genomics Consortium                                                      |
| Armin                             | Wolf       |                       |                  | University Eye Clinic, Ludwig Maximilians University                                                  | Munich, Germany                          |                                                         | International AMD Genomics Consortium                                                      |
| Caroline                          | Brandl     |                       |                  | Department of Genetic Epidemiology, University of Regensburg                                          | Regensburg, Germany                      |                                                         | International AMD Genomics Consortium                                                      |
|                                   |            |                       |                  | Institute of Human Genetics, University of Regensburg                                                 | Regensburg, Germany                      |                                                         | International AMD Genomics Consortium                                                      |
|                                   |            |                       |                  | Department of Ophthalmology, University Hospital Regensburg                                           | Regensburg, Germany                      |                                                         | International AMD Genomics Consortium                                                      |
| Guenther                          | Rudolph    |                       |                  | University Eye Clinic, Ludwig Maximilians University                                                  | Munich, Germany                          |                                                         | International AMD Genomics Consortium                                                      |
| Matthias                          | Olden      |                       |                  | Department of Genetic Epidemiology, University of Regensburg                                          | Regensburg, Germany                      |                                                         | International AMD Genomics Consortium                                                      |
| Margaux A                         | Morrison   |                       |                  | Department of Ophthalmology and Visual Sciences, University of Utah                                   | Salt Lake City, Utah, USA                |                                                         | International AMD Genomics Consortium                                                      |
| Denise J                          | Morgan     |                       |                  | Department of Ophthalmology and Visual Sciences, University of Utah                                   | Salt Lake City, Utah, USA                |                                                         | International AMD Genomics Consortium                                                      |
| Matthew                           | Schu       |                       |                  | Department of Medicine (Biomedical Genetics), Boston University Schools of Medicine and Public Health | Boston, Massachusetts, USA               |                                                         | International AMD Genomics Consortium                                                      |
|                                   |            |                       |                  | Department of Ophthalmology, Boston University Schools of Medicine and Public Health                  | Boston, Massachusetts, USA               |                                                         | International AMD Genomics Consortium                                                      |
|                                   |            |                       |                  | Department of Neurology, Boston University Schools of Medicine and Public Health                      | Boston, Massachusetts, USA               |                                                         | International AMD Genomics Consortium                                                      |
|                                   |            |                       |                  | Department of Epidemiology, Boston University Schools of Medicine and Public Health                   | Boston, Massachusetts, USA               |                                                         | International AMD Genomics Consortium                                                      |



## Supplemental Online Content: Nonauthor Collaborators

\*Indicates required information. Only first name, last name, and suffix will appear in PubMed.

| *First Name and Middle Initial(s) | *Last Name | *Suffix (eg, Jr, III) | Academic Degrees | Institution                                                                                                 | Location (city, state/province, country) | Role or Contribution, eg, chair, principal investigator | Group (if more than 1 Group listed in the byline) and/or Subgroup (eg, Steering Committee) |
|-----------------------------------|------------|-----------------------|------------------|-------------------------------------------------------------------------------------------------------------|------------------------------------------|---------------------------------------------------------|--------------------------------------------------------------------------------------------|
|                                   |            |                       |                  | Department of Biostatistics, Boston University Schools of Medicine and Public Health                        | Boston, Massachusetts, USA               |                                                         | International AMD Genomics Consortium                                                      |
| Jeeyun                            | Ahn        |                       |                  | Department of Ophthalmology, Seoul Metropolitan Government Seoul National University Boramae Medical Center | Seoul, Republic of Korea                 |                                                         | International AMD Genomics Consortium                                                      |
| Giuliana                          | Silvestri  |                       |                  | Centre for Experimental Medicine, Queen's University                                                        | Belfast, UK                              |                                                         | International AMD Genomics Consortium                                                      |
| Evangelia E                       | Tsironi    |                       |                  | Department of Ophthalmology, University of Thessaly, School of Medicine                                     | Larissa, Greece                          |                                                         | International AMD Genomics Consortium                                                      |
| Kyu Hyung                         | Park       |                       |                  | Department of Ophthalmology, Seoul National University Bundang Hospital                                     | Seongnam, Republic of Korea              |                                                         | International AMD Genomics Consortium                                                      |
| Lindsay A                         | Farrer     |                       |                  | Department of Medicine (Biomedical Genetics), Boston University Schools of Medicine and Public Health       | Boston, Massachusetts, USA               |                                                         | International AMD Genomics Consortium                                                      |
|                                   |            |                       |                  | Department of Ophthalmology, Boston University Schools of Medicine and Public Health                        | Boston, Massachusetts, USA               |                                                         | International AMD Genomics Consortium                                                      |
|                                   |            |                       |                  | Department of Neurology, Boston University Schools of Medicine and Public Health                            | Boston, Massachusetts, USA               |                                                         | International AMD Genomics Consortium                                                      |
|                                   |            |                       |                  | Department of Epidemiology, Boston University Schools of Medicine and Public Health                         | Boston, Massachusetts, USA               |                                                         | International AMD Genomics Consortium                                                      |
|                                   |            |                       |                  | Department of Biostatistics, Boston University Schools of Medicine and Public Health                        | Boston, Massachusetts, USA               |                                                         | International AMD Genomics Consortium                                                      |
| Anton                             | Orlin      |                       |                  | Department of Ophthalmology, Weill Cornell Medical College                                                  | New York, New York, USA                  |                                                         | International AMD Genomics Consortium                                                      |

\*Indicates required information. Only first name, last name, and suffix will appear in PubMed.

| *First Name and Middle Initial(s) | *Last Name  | *Suffix (eg, Jr, III) | Academic Degrees | Institution                                                                                               | Location (city, state/province, country) | Role or Contribution, eg, chair, principal investigator | Group (if more than 1 Group listed in the byline) and/or Subgroup (eg, Steering Committee) |
|-----------------------------------|-------------|-----------------------|------------------|-----------------------------------------------------------------------------------------------------------|------------------------------------------|---------------------------------------------------------|--------------------------------------------------------------------------------------------|
| Alexander                         | Brucker     |                       |                  | Scheie Eye Institute, Department of Ophthalmology, University of Pennsylvania Perelman School of Medicine | Philadelphia, Pennsylvania, USA          |                                                         | International AMD Genomics Consortium                                                      |
| Mingyao                           | Li          |                       |                  | Department of Biostatistics and Epidemiology, University of Pennsylvania Perelman School of Medicine      | Philadelphia, Pennsylvania, USA          |                                                         | International AMD Genomics Consortium                                                      |
| Christine A                       | Curcio      |                       |                  | Department of Ophthalmology, University of Alabama at Birmingham                                          | Birmingham, Alabama, USA                 |                                                         | International AMD Genomics Consortium                                                      |
| Saddek                            | Mohand-Saïd |                       |                  | INSERM                                                                                                    | Paris, France                            |                                                         | International AMD Genomics Consortium                                                      |
|                                   |             |                       |                  | Institut de la Vision, Department of Genetics                                                             | Paris, France                            |                                                         | International AMD Genomics Consortium                                                      |
|                                   |             |                       |                  | Centre National de la Recherche Scientifique (CNRS)                                                       | Paris, France                            |                                                         | International AMD Genomics Consortium                                                      |
|                                   |             |                       |                  | Centre Hospitalier National d'Ophtalmologie des Quinze-Vingts                                             | Paris, France                            |                                                         | International AMD Genomics Consortium                                                      |
| José-Alain                        | Sahel       |                       |                  | University College London Institute of Ophthalmology, University College London                           | London, UK                               |                                                         | International AMD Genomics Consortium                                                      |
|                                   |             |                       |                  | INSERM                                                                                                    | Paris, France                            |                                                         | International AMD Genomics Consortium                                                      |
|                                   |             |                       |                  | Institut de la Vision, Department of Genetics                                                             | Paris, France                            |                                                         | International AMD Genomics Consortium                                                      |
|                                   |             |                       |                  | Centre National de la Recherche Scientifique (CNRS)                                                       | Paris, France                            |                                                         | International AMD Genomics Consortium                                                      |
|                                   |             |                       |                  | Centre Hospitalier National d'Ophtalmologie des Quinze-Vingts                                             | Paris, France                            |                                                         | International AMD Genomics Consortium                                                      |
|                                   |             |                       |                  | Fondation Ophtalmologique Adolphe de Rothschild                                                           | Paris, France                            |                                                         | International AMD Genomics Consortium                                                      |
|                                   |             |                       |                  | Académie des Sciences–Institut de France                                                                  | Paris, France                            |                                                         | International AMD Genomics Consortium                                                      |

## Supplemental Online Content: Nonauthor Collaborators

\*Indicates required information. Only first name, last name, and suffix will appear in PubMed.

| *First Name and Middle Initial(s) | *Last Name  | *Suffix (eg, Jr, III) | Academic Degrees | Institution                                                                                    | Location (city, state/province, country) | Role or Contribution, eg, chair, principal investigator | Group (if more than 1 Group listed in the byline) and/or Subgroup (eg, Steering Committee) |
|-----------------------------------|-------------|-----------------------|------------------|------------------------------------------------------------------------------------------------|------------------------------------------|---------------------------------------------------------|--------------------------------------------------------------------------------------------|
| Isabelle                          | Audo        |                       |                  | Department of Molecular Genetics, Institute of Ophthalmology                                   | London, UK                               |                                                         | International AMD Genomics Consortium                                                      |
|                                   |             |                       |                  | INSERM                                                                                         | Paris, France                            |                                                         | International AMD Genomics Consortium                                                      |
|                                   |             |                       |                  | Institut de la Vision, Department of Genetics                                                  | Paris, France                            |                                                         | International AMD Genomics Consortium                                                      |
|                                   |             |                       |                  | Centre National de la Recherche Scientifique (CNRS)                                            | Paris, France                            |                                                         | International AMD Genomics Consortium                                                      |
| Mustapha                          | Benchaboune |                       |                  | Centre Hospitalier National d'Ophthalmologie des Quinze-Vingts                                 | Paris, France                            |                                                         | International AMD Genomics Consortium                                                      |
| Angela J                          | Cree        |                       |                  | Clinical and Experimental Sciences, Faculty of Medicine, University of Southampton             | Southampton, UK                          |                                                         | International AMD Genomics Consortium                                                      |
| Christina A                       | Rennie      |                       |                  | University Hospital Southampton                                                                | Southampton, UK                          |                                                         | International AMD Genomics Consortium                                                      |
| Srinivas V                        | Goverdhan   |                       |                  | Clinical and Experimental Sciences, Faculty of Medicine, University of Southampton             | Southampton, UK                          |                                                         | International AMD Genomics Consortium                                                      |
| Michelle                          | Grunin      |                       |                  | Department of Ophthalmology, Hadassah Hebrew University Medical Center                         | Jerusalem, Israel                        |                                                         | International AMD Genomics Consortium                                                      |
| Shira                             | Hagbi-Levi  |                       |                  | Department of Ophthalmology, Hadassah Hebrew University Medical Center                         | Jerusalem, Israel                        |                                                         | International AMD Genomics Consortium                                                      |
| Peter                             | Campochiaro |                       |                  | Department of Ophthalmology, Wilmer Eye Institute, Johns Hopkins University School of Medicine | Baltimore, Maryland, USA                 |                                                         | International AMD Genomics Consortium                                                      |
|                                   |             |                       |                  | Department of Neuroscience, Johns Hopkins University School of Medicine                        | Baltimore, Maryland, USA                 |                                                         | International AMD Genomics Consortium                                                      |
| Nicholas                          | Katsanis    |                       |                  | Center for Human Disease Modeling, Duke University, Durham                                     | North Carolina, USA                      |                                                         | International AMD Genomics Consortium                                                      |

Supplemental Online Content: Nonauthor Collaborators

\*Indicates required information. Only first name, last name, and suffix will appear in PubMed.

| *First Name and Middle Initial(s) | *Last Name | *Suffix (eg, Jr, III) | Academic Degrees | Institution                                                                                                                | Location (city, state/province, country) | Role or Contribution, eg, chair, principal investigator | Group (if more than 1 Group listed in the byline) and/or Subgroup (eg, Steering Committee) |
|-----------------------------------|------------|-----------------------|------------------|----------------------------------------------------------------------------------------------------------------------------|------------------------------------------|---------------------------------------------------------|--------------------------------------------------------------------------------------------|
|                                   |            |                       |                  | Department of Cell Biology, Duke University, Durham                                                                        | North Carolina, USA                      |                                                         | International AMD Genomics Consortium                                                      |
|                                   |            |                       |                  | Department of Pediatrics, Duke University, Durham                                                                          | North Carolina, USA                      |                                                         | International AMD Genomics Consortium                                                      |
| Frank G                           | Holz       |                       |                  | Department of Ophthalmology, University of Bonn                                                                            | Bonn, Germany                            |                                                         | International AMD Genomics Consortium                                                      |
| Frédéric                          | Blond      |                       |                  | INSERM                                                                                                                     | Paris, France                            |                                                         | International AMD Genomics Consortium                                                      |
|                                   |            |                       |                  | Institut de la Vision, Department of Genetics                                                                              | Paris, France                            |                                                         | International AMD Genomics Consortium                                                      |
|                                   |            |                       |                  | Centre National de la Recherche Scientifique (CNRS)                                                                        | Paris, France                            |                                                         | International AMD Genomics Consortium                                                      |
| Hélène                            | Blanché    |                       |                  | Centre d'Etude du Polymorphisme Humain (CEPH) Fondation Jean Dausset                                                       | Paris, France                            |                                                         | International AMD Genomics Consortium                                                      |
| Jean-François                     | Deleuze    |                       |                  | Centre d'Etude du Polymorphisme Humain (CEPH) Fondation Jean Dausset                                                       | Paris, France                            |                                                         | International AMD Genomics Consortium                                                      |
|                                   |            |                       |                  | Commissariat à l'Energie Atomique et aux Energies Alternatives (CEA), Institut de Génomique, Centre National de Génotypage | Evry, France                             |                                                         | International AMD Genomics Consortium                                                      |
| Robert P                          | Igo        | Jr                    |                  | Department of Epidemiology and Biostatistics, Case Western Reserve University School of Medicine                           | Cleveland, Ohio, USA                     |                                                         | International AMD Genomics Consortium                                                      |
| Barbara                           | Truitt     |                       |                  | Department of Epidemiology and Biostatistics, Case Western Reserve University School of Medicine                           | Cleveland, Ohio, USA                     |                                                         | International AMD Genomics Consortium                                                      |
| Neal S                            | Peachey    |                       |                  | Louis Stokes Cleveland Veterans Affairs Medical Center                                                                     | Cleveland, Ohio, USA                     |                                                         | International AMD Genomics Consortium                                                      |
|                                   |            |                       |                  | Cole Eye Institute, Cleveland Clinic                                                                                       | Cleveland, Ohio, USA                     |                                                         | International AMD Genomics Consortium                                                      |

## Supplemental Online Content: Nonauthor Collaborators

\*Indicates required information. Only first name, last name, and suffix will appear in PubMed.

| *First Name and Middle Initial(s) | *Last Name | *Suffix (eg, Jr, III) | Academic Degrees | Institution                                                                                 | Location (city, state/province, country) | Role or Contribution, eg, chair, principal investigator | Group (if more than 1 Group listed in the byline) and/or Subgroup (eg, Steering Committee) |
|-----------------------------------|------------|-----------------------|------------------|---------------------------------------------------------------------------------------------|------------------------------------------|---------------------------------------------------------|--------------------------------------------------------------------------------------------|
| Stacy M                           | Meuer      |                       |                  | Department of Ophthalmology and Visual Sciences, University of Wisconsin                    | Madison, Wisconsin, USA                  |                                                         | International AMD Genomics Consortium                                                      |
| Chelsea E                         | Myers      |                       |                  | Department of Ophthalmology and Visual Sciences, University of Wisconsin                    | Madison, Wisconsin, USA                  |                                                         | International AMD Genomics Consortium                                                      |
| Emily L                           | Moore      |                       |                  | Department of Ophthalmology and Visual Sciences, University of Wisconsin                    | Madison, Wisconsin, USA                  |                                                         | International AMD Genomics Consortium                                                      |
| Ronald                            | Klein      |                       |                  | Department of Ophthalmology and Visual Sciences, University of Wisconsin                    | Madison, Wisconsin, USA                  |                                                         | International AMD Genomics Consortium                                                      |
| Michael A                         | Hauser     |                       |                  | Department of Ophthalmology, Duke University Medical Center                                 | Durham, North Carolina, USA              |                                                         | International AMD Genomics Consortium                                                      |
|                                   |            |                       |                  | Department of Medicine, Duke University Medical Center                                      | Durham, North Carolina, USA              |                                                         | International AMD Genomics Consortium                                                      |
|                                   |            |                       |                  | Duke Molecular Physiology Institute, Duke University Medical Center                         | Durham, North Carolina, USA              |                                                         | International AMD Genomics Consortium                                                      |
| Eric A                            | Postel     |                       |                  | Department of Ophthalmology, Duke University Medical Center                                 | Durham, North Carolina, USA              |                                                         | International AMD Genomics Consortium                                                      |
| Monique D                         | Courtenay  |                       |                  | John P Hussman Institute for Human Genomics, Miller School of Medicine, University of Miami | Miami, Florida, USA                      |                                                         | International AMD Genomics Consortium                                                      |
| Stephen G                         | Schwartz   |                       |                  | Bascom Palmer Eye Institute, University of Miami Miller School of Medicine                  | Naples, Florida, USA                     |                                                         | International AMD Genomics Consortium                                                      |
| Jaclyn L                          | Kovach     |                       |                  | Bascom Palmer Eye Institute, University of Miami Miller School of Medicine                  | Naples, Florida, USA                     |                                                         | International AMD Genomics Consortium                                                      |
| William K                         | Scott      |                       |                  | John P Hussman Institute for Human Genomics, Miller School of Medicine, University of Miami | Miami, Florida, USA                      |                                                         | International AMD Genomics Consortium                                                      |

## Supplemental Online Content: Nonauthor Collaborators

\*Indicates required information. Only first name, last name, and suffix will appear in PubMed.

| *First Name and Middle Initial(s) | *Last Name | *Suffix (eg, Jr, III) | Academic Degrees | Institution                                                                                                                          | Location (city, state/province, country) | Role or Contribution, eg, chair, principal investigator | Group (if more than 1 Group listed in the byline) and/or Subgroup (eg, Steering Committee) |
|-----------------------------------|------------|-----------------------|------------------|--------------------------------------------------------------------------------------------------------------------------------------|------------------------------------------|---------------------------------------------------------|--------------------------------------------------------------------------------------------|
| Gerald                            | Liew       |                       |                  | Centre for Vision Research, Department of Ophthalmology and Westmead Millennium Institute for Medical Research, University of Sydney | Sydney, New South Wales, Australia       |                                                         | International AMD Genomics Consortium                                                      |
| Ava G                             | Tan        |                       |                  | Centre for Vision Research, Department of Ophthalmology and Westmead Millennium Institute for Medical Research, University of Sydney | Sydney, New South Wales, Australia       |                                                         | International AMD Genomics Consortium                                                      |
| Bamini                            | Gopinath   |                       |                  | Centre for Vision Research, Department of Ophthalmology and Westmead Millennium Institute for Medical Research, University of Sydney | Sydney, New South Wales, Australia       |                                                         | International AMD Genomics Consortium                                                      |
| John C                            | Merriam    |                       |                  | Department of Ophthalmology, Columbia University                                                                                     | New York, New York, USA                  |                                                         | International AMD Genomics Consortium                                                      |
| R Theodore                        | Smith      |                       |                  | Department of Ophthalmology, Columbia University                                                                                     | New York, New York, USA                  |                                                         | International AMD Genomics Consortium                                                      |
|                                   |            |                       |                  | Department of Ophthalmology, New York University School of Medicine                                                                  | New York, New York, USA                  |                                                         | International AMD Genomics Consortium                                                      |
| Jane C                            | Khan       |                       |                  | Centre for Ophthalmology and Visual Science, Lions Eye Institute, University of Western Australia                                    | Perth, Western Australia, Australia      |                                                         | International AMD Genomics Consortium                                                      |
|                                   |            |                       |                  | Department of Ophthalmology, Royal Perth Hospital                                                                                    | Perth, Western Australia, Australia      |                                                         | International AMD Genomics Consortium                                                      |
|                                   |            |                       |                  | Department of Medical Genetics, Cambridge Institute for Medical Research, University of Cambridge                                    | Cambridge, UK                            |                                                         | International AMD Genomics Consortium                                                      |
| Humma                             | Shahid     |                       |                  | Department of Medical Genetics, Cambridge Institute for Medical Research, University of Cambridge                                    | Cambridge, UK                            |                                                         | International AMD Genomics Consortium                                                      |

## Supplemental Online Content: Nonauthor Collaborators

\*Indicates required information. Only first name, last name, and suffix will appear in PubMed.

| *First Name and Middle Initial(s) | *Last Name | *Suffix (eg, Jr, III) | Academic Degrees | Institution                                                                                                | Location (city, state/province, country) | Role or Contribution, eg, chair, principal investigator | Group (if more than 1 Group listed in the byline) and/or Subgroup (eg, Steering Committee) |
|-----------------------------------|------------|-----------------------|------------------|------------------------------------------------------------------------------------------------------------|------------------------------------------|---------------------------------------------------------|--------------------------------------------------------------------------------------------|
|                                   |            |                       |                  | Department of Ophthalmology, Cambridge University Hospitals National Health Service (NHS) Foundation Trust | Cambridge, UK                            |                                                         | International AMD Genomics Consortium                                                      |
| Anthony T                         | Moore      |                       |                  | University College London Institute of Ophthalmology, University College London                            | London, UK                               |                                                         | International AMD Genomics Consortium                                                      |
|                                   |            |                       |                  | Moorfields Eye Hospital                                                                                    | London, UK                               |                                                         | International AMD Genomics Consortium                                                      |
|                                   |            |                       |                  | Department of Ophthalmology, University of California San Francisco Medical School                         | San Francisco, California, USA           |                                                         | International AMD Genomics Consortium                                                      |
| J Allie                           | McGrath    |                       |                  | Center for Human Genetics Research, Vanderbilt University Medical Center                                   | Nashville, Tennessee, USA                |                                                         | International AMD Genomics Consortium                                                      |
| Reneé                             | Laux       |                       |                  | Department of Epidemiology and Biostatistics, Case Western Reserve University School of Medicine           | Cleveland, Ohio, USA                     |                                                         | International AMD Genomics Consortium                                                      |
| Milam A                           | Brantley   | Jr                    |                  | Department of Ophthalmology and Visual Sciences, Vanderbilt University                                     | Nashville, Tennessee, USA                |                                                         | International AMD Genomics Consortium                                                      |
| Anita                             | Agarwal    |                       |                  | Department of Ophthalmology and Visual Sciences, Vanderbilt University                                     | Nashville, Tennessee, USA                |                                                         | International AMD Genomics Consortium                                                      |
| Lebriz                            | Ersoy      |                       |                  | Department of Ophthalmology, University Hospital of Cologne                                                | Cologne, Germany                         |                                                         | International AMD Genomics Consortium                                                      |
| Albert                            | Caramoy    |                       |                  | Department of Ophthalmology, University Hospital of Cologne                                                | Cologne, Germany                         |                                                         | International AMD Genomics Consortium                                                      |
| Thomas                            | Langmann   |                       |                  | Department of Ophthalmology, University Hospital of Cologne                                                | Cologne, Germany                         |                                                         | International AMD Genomics Consortium                                                      |
| Nicole T M                        | Saksens    |                       |                  | Department of Ophthalmology, Radboud University Medical Centre                                             | Nijmegen, the Netherlands                |                                                         | International AMD Genomics Consortium                                                      |

## Supplemental Online Content: Nonauthor Collaborators

\*Indicates required information. Only first name, last name, and suffix will appear in PubMed.

| *First Name and Middle Initial(s) | *Last Name | *Suffix (eg, Jr, III) | Academic Degrees | Institution                                                                                                             | Location (city, state/province, country) | Role or Contribution, eg, chair, principal investigator | Group (if more than 1 Group listed in the byline) and/or Subgroup (eg, Steering Committee) |
|-----------------------------------|------------|-----------------------|------------------|-------------------------------------------------------------------------------------------------------------------------|------------------------------------------|---------------------------------------------------------|--------------------------------------------------------------------------------------------|
| Eiko K de                         | Jong       |                       |                  | Department of Ophthalmology, Radboud University Medical Centre                                                          | Nijmegen, the Netherlands                |                                                         | International AMD Genomics Consortium                                                      |
| Carel B                           | Hoyng      |                       |                  | Department of Ophthalmology, Radboud University Medical Centre                                                          | Nijmegen, the Netherlands                |                                                         | International AMD Genomics Consortium                                                      |
| Melinda S                         | Cain       |                       |                  | Centre for Eye Research Australia, University of Melbourne, Royal Victorian Eye and Ear Hospital                        | East Melbourne, Victoria, Australia      |                                                         | International AMD Genomics Consortium                                                      |
| Andrea J                          | Richardson |                       |                  | Centre for Eye Research Australia, University of Melbourne, Royal Victorian Eye and Ear Hospital                        | East Melbourne, Victoria, Australia      |                                                         | International AMD Genomics Consortium                                                      |
| Tammy M                           | Martin     |                       |                  | Casey Eye Institute, Oregon Health and Science University                                                               | Portland, Oregon, USA                    |                                                         | International AMD Genomics Consortium                                                      |
| John                              | Blangero   |                       |                  | South Texas Diabetes and Obesity Institute, School of Medicine, University of Texas Rio Grande Valley                   | Brownsville, Texas, USA                  |                                                         | International AMD Genomics Consortium                                                      |
| Daniel E                          | Weeks      |                       |                  | Department of Biostatistics, Graduate School of Public Health, University of Pittsburgh                                 | Pittsburgh, Pennsylvania, USA            |                                                         | International AMD Genomics Consortium                                                      |
|                                   |            |                       |                  | Department of Human Genetics, Graduate School of Public Health, University of Pittsburgh                                | Pittsburgh, Pennsylvania, USA            |                                                         | International AMD Genomics Consortium                                                      |
| Bal                               | Dhillon    |                       |                  | School of Clinical Sciences, University of Edinburgh                                                                    | Edinburgh, UK                            |                                                         | International AMD Genomics Consortium                                                      |
| Cornelia M                        | Van Duijn  |                       |                  | Department of Epidemiology, Erasmus Medical Center                                                                      | Rotterdam, the Netherlands               |                                                         | International AMD Genomics Consortium                                                      |
| Kimberly F                        | Doheny     |                       |                  | Center for Inherited Disease Research (CIDR) Institute of Genetic Medicine, Johns Hopkins University School of Medicine | Baltimore, Maryland, USA                 |                                                         | International AMD Genomics Consortium                                                      |



## Supplemental Online Content: Nonauthor Collaborators

\*Indicates required information. Only first name, last name, and suffix will appear in PubMed.

| *First Name and Middle Initial(s) | *Last Name | *Suffix (eg, Jr, III) | Academic Degrees | Institution                                                                                                               | Location (city, state/province, country)  | Role or Contribution, eg, chair, principal investigator | Group (if more than 1 Group listed in the byline) and/or Subgroup (eg, Steering Committee) |
|-----------------------------------|------------|-----------------------|------------------|---------------------------------------------------------------------------------------------------------------------------|-------------------------------------------|---------------------------------------------------------|--------------------------------------------------------------------------------------------|
| Jane                              | Romm       |                       |                  | Center for Inherited Disease Research (CIDR) Institute of Genetic Medicine, Johns Hopkins University School of Medicine   | Baltimore, Maryland, USA                  |                                                         | International AMD Genomics Consortium                                                      |
| Caroline C W                      | Klaver     |                       |                  | Department of Ophthalmology, Erasmus Medical Center                                                                       | Rotterdam, the Netherlands                |                                                         | International AMD Genomics Consortium                                                      |
|                                   |            |                       |                  | Department of Epidemiology, Erasmus Medical Center                                                                        | Rotterdam, the Netherlands                |                                                         | International AMD Genomics Consortium                                                      |
| Caroline                          | Hayward    |                       |                  | Medical Research Council (MRC) Human Genetics Unit, Institute of Genetics and Molecular Medicine, University of Edinburgh | Edinburgh, UK                             |                                                         | International AMD Genomics Consortium                                                      |
| Michael B                         | Gorin      |                       |                  | Department of Ophthalmology, David Geffen School of Medicine, Stein Eye Institute, University of California               | Los Angeles, Los Angeles, California, USA |                                                         | International AMD Genomics Consortium                                                      |
|                                   |            |                       |                  | Department of Human Genetics, David Geffen School of Medicine, University of California                                   | Los Angeles, Los Angeles, California, USA |                                                         | International AMD Genomics Consortium                                                      |
| Michael L                         | Klein      |                       |                  | Casey Eye Institute, Oregon Health and Science University                                                                 | Portland, Oregon, USA                     |                                                         | International AMD Genomics Consortium                                                      |
| Paul N                            | Baird      |                       |                  | Centre for Eye Research Australia, University of Melbourne, Royal Victorian Eye and Ear Hospital                          | East Melbourne, Victoria, Australia       |                                                         | International AMD Genomics Consortium                                                      |
| Anneke I den                      | Hollander  |                       |                  | Department of Ophthalmology, Radboud University Medical Centre                                                            | Nijmegen, the Netherlands                 |                                                         | International AMD Genomics Consortium                                                      |
|                                   |            |                       |                  | Department of Human Genetics, Radboud University Medical Centre                                                           | Nijmegen, the Netherlands                 |                                                         | International AMD Genomics Consortium                                                      |
| Sascha                            | Fauser     |                       |                  | Department of Ophthalmology, University Hospital of Cologne                                                               | Cologne, Germany                          |                                                         | International AMD Genomics Consortium                                                      |
| John R W                          | Yates      |                       |                  | University College London Institute of Ophthalmology, University College London                                           | London, UK                                |                                                         | International AMD Genomics Consortium                                                      |

## Supplemental Online Content: Nonauthor Collaborators

\*Indicates required information. Only first name, last name, and suffix will appear in PubMed.

| *First Name and Middle Initial(s) | *Last Name | *Suffix (eg, Jr, III) | Academic Degrees | Institution                                                                                                                          | Location (city, state/province, country) | Role or Contribution, eg, chair, principal investigator | Group (if more than 1 Group listed in the byline) and/or Subgroup (eg, Steering Committee) |
|-----------------------------------|------------|-----------------------|------------------|--------------------------------------------------------------------------------------------------------------------------------------|------------------------------------------|---------------------------------------------------------|--------------------------------------------------------------------------------------------|
|                                   |            |                       |                  | Moorfields Eye Hospital                                                                                                              | London, UK                               |                                                         | International AMD Genomics Consortium                                                      |
|                                   |            |                       |                  | Department of Medical Genetics, Cambridge Institute for Medical Research, University of Cambridge                                    | Cambridge, UK                            |                                                         | International AMD Genomics Consortium                                                      |
| Rando                             | Allikmets  |                       |                  | Department of Ophthalmology, Columbia University                                                                                     | New York, New York, USA                  |                                                         | International AMD Genomics Consortium                                                      |
|                                   |            |                       |                  | Department of Pathology and Cell Biology, Columbia University                                                                        | New York, New York, USA                  |                                                         | International AMD Genomics Consortium                                                      |
| Jie Jin                           | Wang       |                       |                  | Centre for Vision Research, Department of Ophthalmology and Westmead Millennium Institute for Medical Research, University of Sydney | Sydney, New South Wales, Australia       |                                                         | International AMD Genomics Consortium                                                      |
| Debra A                           | Schaumberg |                       |                  | Department of Epidemiology, Harvard School of Public Health                                                                          | Boston, Massachusetts, USA               |                                                         | International AMD Genomics Consortium                                                      |
|                                   |            |                       |                  | Center for Translational Medicine, Moran Eye Center, University of Utah School of Medicine                                           | Salt Lake City, Utah, USA                |                                                         | International AMD Genomics Consortium                                                      |
|                                   |            |                       |                  | Division of Preventive Medicine, Brigham and Women's Hospital, Harvard Medical School                                                | Boston, Massachusetts, USA               |                                                         | International AMD Genomics Consortium                                                      |
| Barbara E K                       | Klein      |                       |                  | Department of Ophthalmology and Visual Sciences, University of Wisconsin                                                             | Madison, Wisconsin, USA                  |                                                         | International AMD Genomics Consortium                                                      |
| Stephanie A                       | Hagstrom   |                       |                  | Cole Eye Institute, Cleveland Clinic                                                                                                 | Cleveland, Ohio, USA                     |                                                         | International AMD Genomics Consortium                                                      |
| Itay                              | Chowers    |                       |                  | Department of Ophthalmology, Hadassah Hebrew University Medical Center                                                               | Jerusalem, Israel                        |                                                         | International AMD Genomics Consortium                                                      |
| Andrew J                          | Lotery     |                       |                  | Clinical and Experimental Sciences, Faculty of Medicine, University of Southampton                                                   | Southampton, UK                          |                                                         | International AMD Genomics Consortium                                                      |
| Thierry                           | Léveillard |                       |                  | INSERM                                                                                                                               | Paris, France                            |                                                         | International AMD Genomics Consortium                                                      |
|                                   |            |                       |                  | Institut de la Vision, Department of Genetics                                                                                        | Paris, France                            |                                                         | International AMD Genomics Consortium                                                      |

## Supplemental Online Content: Nonauthor Collaborators

\*Indicates required information. Only first name, last name, and suffix will appear in PubMed.

| *First Name and Middle Initial(s) | *Last Name    | *Suffix (eg, Jr, III) | Academic Degrees | Institution                                                                                                                          | Location (city, state/province, country) | Role or Contribution, eg, chair, principal investigator | Group (if more than 1 Group listed in the byline) and/or Subgroup (eg, Steering Committee) |
|-----------------------------------|---------------|-----------------------|------------------|--------------------------------------------------------------------------------------------------------------------------------------|------------------------------------------|---------------------------------------------------------|--------------------------------------------------------------------------------------------|
|                                   |               |                       |                  | Centre National de la Recherche Scientifique (CNRS)                                                                                  | Paris, France                            |                                                         | International AMD Genomics Consortium                                                      |
| Kang                              | Zhang         |                       |                  | Department of Ophthalmology, University of California, San Diego and Veterans Affairs San Diego Health System                        | La Jolla, California, USA                |                                                         | International AMD Genomics Consortium                                                      |
|                                   |               |                       |                  | Molecular Medicine Research Center, State Key Laboratory of Biotherapy, West China Hospital, Sichuan University                      | Chengdu, China                           |                                                         | International AMD Genomics Consortium                                                      |
| Murray H                          | Brilliant     |                       |                  | Center for Human Genetics, Marshfield Clinic Research Foundation                                                                     | Marshfield, Wisconsin, USA               |                                                         | International AMD Genomics Consortium                                                      |
| Alex W                            | Hewitt        |                       |                  | School of Medicine, Menzies Research Institute Tasmania, University of Tasmania                                                      | Hobart, Tasmania, Australia              |                                                         | International AMD Genomics Consortium                                                      |
|                                   |               |                       |                  | Centre for Eye Research Australia, University of Melbourne, Royal Victorian Eye and Ear Hospital                                     | East Melbourne, Victoria, Australia      |                                                         | International AMD Genomics Consortium                                                      |
|                                   |               |                       |                  | Centre for Ophthalmology and Visual Science, Lions Eye Institute, University of Western Australia                                    | Perth, Western Australia, Australia      |                                                         | International AMD Genomics Consortium                                                      |
| Anand                             | Swaroop       |                       |                  | Neurobiology, Neurodegeneration and Repair Laboratory (N-NRL), National Eye Institute, US National Institutes of Health              | Bethesda, Maryland, USA                  |                                                         | International AMD Genomics Consortium                                                      |
| Emily Y                           | Chew          |                       |                  | Division of Epidemiology and Clinical Applications, Clinical Trials Branch, National Eye Institute, US National Institutes of Health | Bethesda, Maryland, USA                  |                                                         | International AMD Genomics Consortium                                                      |
| Margaret A                        | Pericak-Vance |                       |                  | John P Hussman Institute for Human Genomics, Miller School of Medicine, University of Miami                                          | Miami, Florida, USA                      |                                                         | International AMD Genomics Consortium                                                      |

## Supplemental Online Content: Nonauthor Collaborators

\*Indicates required information. Only first name, last name, and suffix will appear in PubMed.

| *First Name and Middle Initial(s) | *Last Name | *Suffix (eg, Jr, III) | Academic Degrees | Institution                                                                                      | Location (city, state/province, country) | Role or Contribution, eg, chair, principal investigator | Group (if more than 1 Group listed in the byline) and/or Subgroup (eg, Steering Committee) |
|-----------------------------------|------------|-----------------------|------------------|--------------------------------------------------------------------------------------------------|------------------------------------------|---------------------------------------------------------|--------------------------------------------------------------------------------------------|
| Margaret                          | DeAngelis  |                       |                  | Department of Ophthalmology and Visual Sciences, University of Utah                              | Salt Lake City, Utah, USA                |                                                         | International AMD Genomics Consortium                                                      |
| Dwight                            | Stambolian |                       |                  | Department of Ophthalmology, Perelman School of Medicine, University of Pennsylvania             | Philadelphia, Pennsylvania, USA          |                                                         | International AMD Genomics Consortium                                                      |
| Jonathan L                        | Haines     |                       |                  | Department of Epidemiology and Biostatistics, Case Western Reserve University School of Medicine | Cleveland, Ohio, USA                     |                                                         | International AMD Genomics Consortium                                                      |
|                                   |            |                       |                  | Institute for Computational Biology, Case Western Reserve University School of Medicine          | Cleveland, Ohio, USA.                    |                                                         | International AMD Genomics Consortium                                                      |
| Sudha K                           | Iyengar    |                       |                  | Department of Epidemiology and Biostatistics, Case Western Reserve University School of Medicine | Cleveland, Ohio, USA.                    |                                                         | International AMD Genomics Consortium                                                      |
| Bernhard H F                      | Weber      |                       |                  | Institute of Human Genetics, University of Regensburg                                            | Regensburg, Germany                      |                                                         | International AMD Genomics Consortium                                                      |
| Gonçalo R                         | Abecasis   |                       |                  | Center for Statistical Genetics, Department of Biostatistics, University of Michigan             | Ann Arbor, Michigan, USA                 |                                                         | International AMD Genomics Consortium                                                      |
| Iris M                            | Heid       |                       |                  | Department of Genetic Epidemiology, University of Regensburg                                     | Regensburg, Germany                      |                                                         | International AMD Genomics Consortium                                                      |
